# Supplementary material for: Mechanistic insight into the borrowing hydrogen reaction catalysed by a Pd MLC catalyst: unveiling the ligand-to-ligand hydrogen transfer pathway
Source: Royal Society of Chemistry journal article supplement (doi:10.1039/d4qo00688g), 2024-01-01
Supplement: d4qo00688g1.pdf [file d4qo00688g1.pdf]

## Electronic Supplementary Information

# Mechanistic insight into the borrowing hydrogen reaction catalysed by Pd MLC catalyst: Unveiling the ligand-to-ligand hydrogen transfer pathway

Lan-Yu Li and Cheng Hou\*

School of Chemistry and Pharmaceutical Sciences, State Key Laboratory for  
Chemistry and Molecular Engineering of Medicinal Resources, Guangxi Normal  
University, Guilin, 541004, P. R. China

*\*Author to whom correspondence should be addressed at:  
houcheng@gxnu.edu.cn*

### Table of Contents

|                                                                                                                              |     |
|------------------------------------------------------------------------------------------------------------------------------|-----|
| 1. The comparison of free energy barriers using different functionals.....                                                   | S2  |
| 2. The calculation details of standard state correction.....                                                                 | S3  |
| 3. The dehydrogenation reaction pathway mediated by active species A-IM0.....                                                | S4  |
| 4. The hydrogenation reaction pathway mediated by active species A-IM0.....                                                  | S5  |
| 5. The alternative reaction pathway mediated by active species B-IM0.....                                                    | S6  |
| 6. The free energy profile of the chalcone hydrogenation reaction considering B-IM0 as the<br>zero point in free energy..... | S7  |
| 7. The DFT calculated energies of all optimized structures.....                                                              | S8  |
| 8. The cartesian coordinates for all structures.....                                                                         | S11 |

## 1. The comparison of free energy barriers using different functionals.

| Functionals        | B-IM0 | B-TS2 | B-TS3 | B-IM4 |
|--------------------|-------|-------|-------|-------|
| <b>M06-L</b>       | 0.0   | 19.8  | 9.7   | -9.1  |
| <b>PBE0-D3(BJ)</b> | 0.0   | 22.0  | 10.0  | -2.6  |
| <b>TPSSH</b>       | 0.0   | 14.4  | 2.9   | -10.1 |
| <b>TPSSTPSS</b>    | 0.0   | 14.2  | 2.7   | -11.0 |
| <b>BP86</b>        | 0.0   | 12.5  | 0.1   | -11.9 |

**Table S1.** The comparison of free energy barrier using different functionals (kcal/mol).

In order to select appropriate functional for our calculation, we compare a series of functionals which are widely used in the computational studies relevant to catalytic borrowing hydrogenation reaction. The rate-determining transition states and intermediates were calculated using different functionals. The results are shown in Table S1. The relative reaction activation energy and mechanism selectivity calculated by different functionals is basically the same trend. Based on these results, we chose M06-L as the functional considering the computational expense and accuracy.

## 2. The calculation details of standard state correction

As for the room temperature (298.15 K), the molar volume of an ideal gas in the gas phase standard state (298.15 K, 1 atm):

$$V_m = \frac{RT}{P} = \frac{8.314 \times 298.15}{101325} = 0.02246 \text{ m}^3/\text{mol} = 24.46 \text{ L/mol}$$

The free energy change of the process of compressing 1M ideal gas into 1M solution concentration in the standard state:

$$\Delta G_{1\text{atm} \rightarrow 1\text{M}}^{298.15\text{K}} = RT \ln\left(\frac{V_a}{V_b}\right) = \frac{8.314 \times 298.15 \times \ln(24.46)}{1000} = 7.92 \text{ KJ/mol} = 1.89 \text{ kcal/mol}$$

As for the experimental condition (393.15 K), the molar volume of an ideal gas in the gas phase state (393.15 K, 1 atm):

$$V_m = \frac{RT}{P} = \frac{8.314 \times 393.15}{101325} = 0.03226 \text{ m}^3/\text{mol} = 32.26 \text{ L/mol}$$

The free energy change of the process of compressing 1M ideal gas into 1M solution concentration in the standard state:

$$\Delta G_{1\text{atm} \rightarrow 1\text{M}}^{393.15\text{K}} = RT \ln\left(\frac{V_a}{V_b}\right) = \frac{8.314 \times 393.15 \times \ln(32.26)}{1000} = 11.35 \text{ KJ/mol} = 2.71 \text{ kcal/mol}$$

Therefore, a correction factor of 2.71 kcal/mol was applied for the standard state change from 1 atm to 1 M.

### 3. The dehydrogenation reaction pathway mediated by active species A-IM0

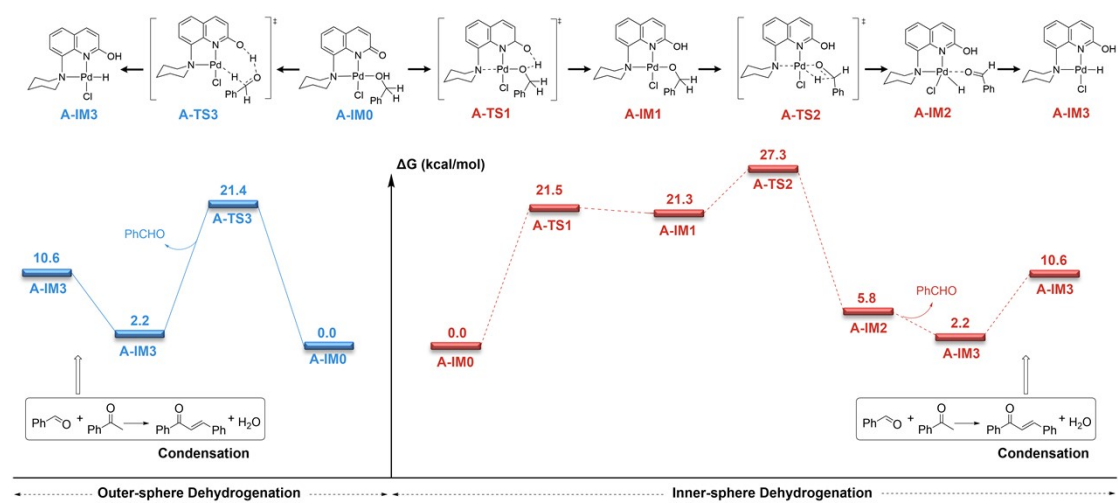

**Figure S1.** Relative free energies (in kcal/mol) of alcohol dehydrogenation reaction.

The active species A-IM0 exhibits a preference for the outer-sphere mechanism during the dehydrogenation process.

#### 4. The hydrogenation reaction pathway mediated by active species A-IM0

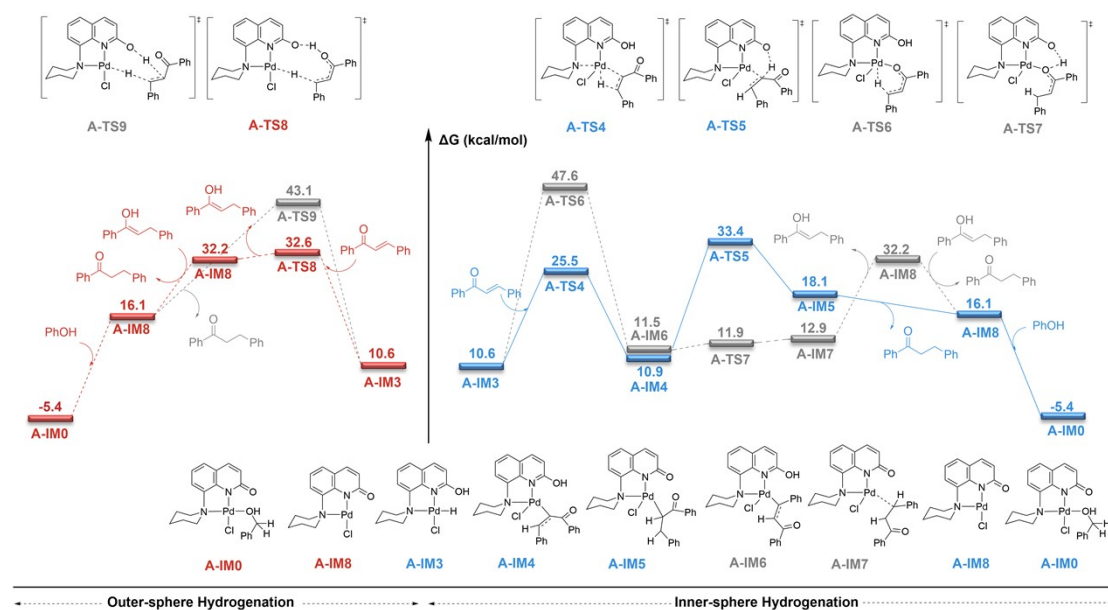

**Figure S2.** Relative free energies (in kcal/mol) of chalcone hydrogenation reaction.

The active species A-IM0 switches to the inner-sphere pathway for the hydrogenation process

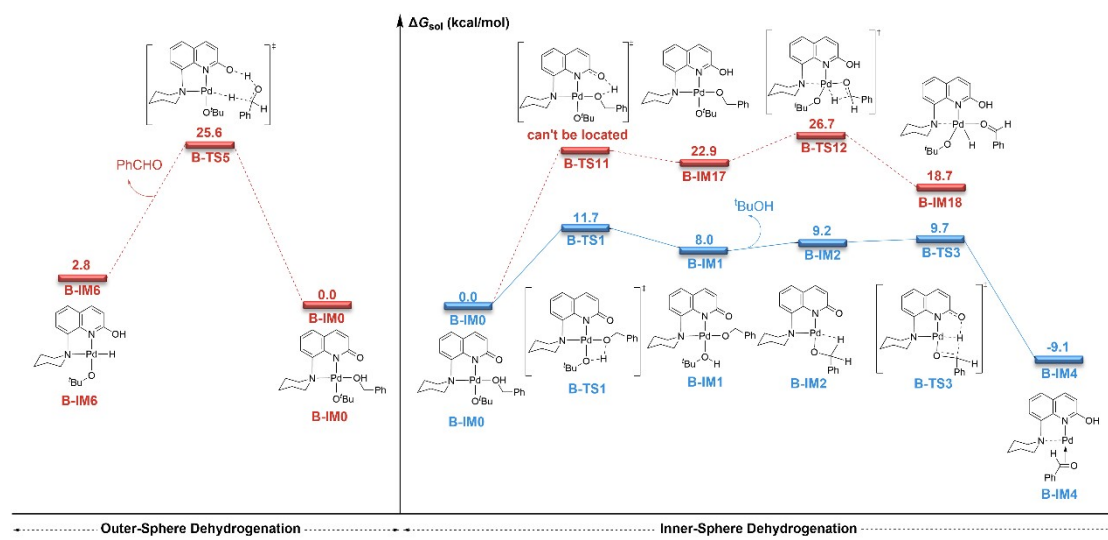

## 5. The alternative reaction pathway mediated by active species B-IM0

Figure S3. Relative free energies (in kcal/mol) of alcohol dehydrogenation reaction.

6. The free energy profile of the chalcone hydrogenation reaction considering B-IM0 as the zero point in free energy

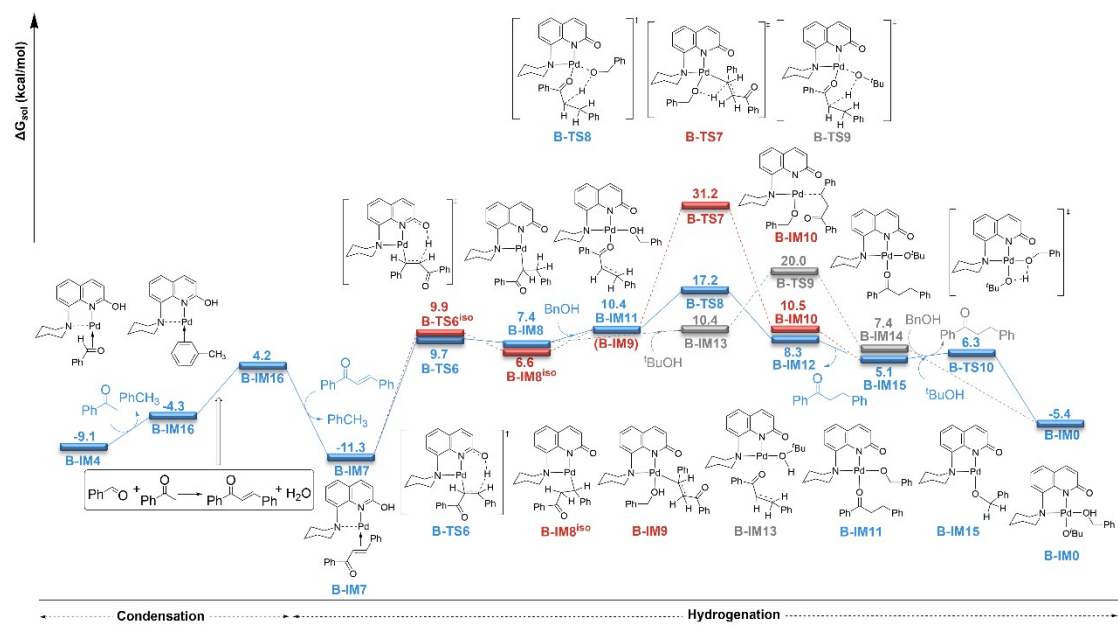

Figure S4. Relative free energies (in kcal/mol) of chalcone hydrogenation reaction.

## 7. The DFT calculated energies of all optimized structures

**Table S2.** The DFT calculated energies of all optimized structures

| Species                        | Gc<br>hartree | G(gas)<br>hartree | Esp +<br>G <sub>SOL</sub><br>hartree | Final G<br>hartree | <i>i</i> (cm <sup>-1</sup> ) |
|--------------------------------|---------------|-------------------|--------------------------------------|--------------------|------------------------------|
| Ph-COCH <sub>3</sub>           | 0.103772      | -<br>384.463763   | -<br>384.9932708                     | -384.8895          |                              |
| BnOH                           | 0.100447      | -<br>346.374027   | -<br>346.8581367                     | -346.7577          |                              |
| <sup>t</sup> BuOH              | 0.107053      | -<br>233.360953   | -<br>233.7325246                     | -233.6255          |                              |
| PhCHO                          | 0.079188      | -<br>345.200149   | -<br>345.6606088                     | -345.5814          |                              |
| Chalcone                       | 0.17578       | -<br>653.303764   | -<br>654.1953979                     | -654.0196          |                              |
| Dihydrochalcone enol form      | 0.197419      | -<br>654.479224   | -<br>655.3925196                     | -655.1951          |                              |
| H <sub>2</sub> O               | 0.00958       | -76.346006        | -<br>76.44736865                     | -76.43779          |                              |
| Dihydrochalcone                | 0.198659      | -<br>654.501053   | -<br>655.4166845                     | -655.218           |                              |
| KCl                            | -0.018883     | -<br>1059.995865  | -<br>1060.219213                     | -1060.238          |                              |
| <sup>t</sup> BuOK              | 0.088184      | -832.63647        | -<br>833.0756276                     | -832.9874          |                              |
| Toluene                        | 0.097483      | -<br>271.234929   | -<br>271.6268358                     | -<br>271.5293528   |                              |
| <b>pre-catalyst activation</b> |               |                   |                                      |                    |                              |
| pre-IM0                        | 0.227274      | -<br>1775.23427   | -<br>1776.59512                      | -<br>1776.36785    |                              |
| pre-IM1                        | 0.339402      | -1547.8668        | -<br>1549.44866                      | -<br>1549.10925    |                              |
| pre-TS1                        | 0.334799      | -<br>1547.86778   | -<br>1549.44443                      | -<br>1549.10964    | -602.06                      |
| pre-IM2                        | 0.342676      | -<br>1547.91128   | -<br>1549.49569                      | -<br>1549.15301    |                              |
| <b>active species B-IM0</b>    |               |                   |                                      |                    |                              |
| B-IM0                          | 0.45089       | -<br>1433.575639  | -<br>1435.500318                     | -<br>1435.049428   |                              |
| B-IM1                          | 0.446197      | -<br>1433.558212  | -<br>1435.482879                     | -<br>1435.036682   |                              |
| B-IM0iso                       | 0.446472      | -<br>1433.548648  | -<br>1435.476238                     | -<br>1435.029766   |                              |
| B-IM1iso                       | 0.447528      | -<br>1433.559899  | -<br>1435.484773                     | -<br>1435.037245   |                              |
| B-IM2iso                       | 0.32242       | -<br>1200.178607  | -<br>1201.720782                     | -<br>1201.398362   |                              |
| B-IM3                          | 0.322244      | -<br>1200.196827  | -<br>1201.733082                     | -<br>1201.410838   |                              |
| B-IM2                          | 0.323429      | -<br>1200.193844  | -<br>1201.732734                     | -<br>1201.409305   |                              |



|                |          |             |             |             |          |
|----------------|----------|-------------|-------------|-------------|----------|
| B-IM4          | 0.323349 | -           | -           | -           |          |
|                |          | 1200.225844 | 1201.761792 | 1201.438443 |          |
| B-IM5          | 0.346846 | -           | -           | -           |          |
|                |          | 1088.363572 | 1089.810634 | 1089.463788 |          |
| B-IM6          | 0.349215 | -           | -           | -           |          |
|                |          | 1088.367027 | 1089.812687 | 1089.463472 |          |
| B-IM7          | 0.423841 | -           | -           | -           |          |
|                |          | 1508.351678 | 1510.317494 | 1509.893653 |          |
| B-IM8          | 0.42628  | -           | -           | -           |          |
|                |          | 1508.321251 | 1510.290219 | 1509.863939 |          |
| B-IM8iso       | 0.423178 | -           | -           | -           |          |
|                |          | 1508.320675 | 1510.288359 | 1509.865181 |          |
| B-IM9          | 0.54366  | -           | -           | -           |          |
|                |          | 1854.694057 | 1857.160375 | 1856.616715 |          |
| B-IM10         | 0.542357 | -           | -           | -           |          |
|                |          | 1854.694848 | 1857.15896  | 1856.616603 |          |
| B-IM11         | 0.545669 | -           | -           | -           |          |
|                |          | 1854.694742 | 1857.162415 | 1856.616746 |          |
| B-IM12         | 0.544233 | -           | -           | -           |          |
|                |          | 1854.696803 | 1857.164357 | 1856.620124 |          |
| B-IM13         | 0.548857 | -           | -           | -           |          |
|                |          | 1741.680848 | 1744.033379 | 1743.484522 |          |
| B-IM14         | 0.544773 | -           | -           | -           |          |
|                |          | 1741.678744 | 1744.034197 | 1743.489424 |          |
| B-IM15         | 0.327398 | -           | -           | -           |          |
|                |          | 1200.196885 | 1201.734644 | 1201.407246 |          |
| B-IM16         | 0.340201 | -           | -           | -           |          |
|                |          | 1126.254984 | 1127.718962 | 1127.378761 |          |
| B-IM17         | 0.447321 | -           | -           | -           |          |
|                |          | 1433.53347  | 1435.460265 | 1435.012944 |          |
| B-IM18         | 0.441335 | -           | -           | -           |          |
|                |          | 1433.546818 | 1435.460968 | 1435.019633 |          |
| B-TS1          | 0.445587 | -           | -           | -           | -782.16  |
|                |          | 1433.554095 | 1435.476315 | 1435.030728 |          |
| B-TS1iso       | 0.444071 | -           | -           | -           | -853.38  |
|                |          | 1433.551685 | 1435.47391  | 1435.029839 |          |
| B-TS2          | 0.321229 | -           | -           | -           | -410.91  |
|                |          | 1200.175399 | 1201.713585 | 1201.392356 |          |
| B-TS3          | 0.320724 | -           | -           | -           | -596.02  |
|                |          | 1200.194216 | 1201.729265 | 1201.408541 |          |
| B-TS4          | 0.442168 | -           | -           | -           | -884.27  |
|                |          | 1433.547941 | 1435.464506 | 1435.022338 |          |
| B-TS5          | 0.444254 | -           | -           | -           | -816.22  |
|                |          | 1433.534899 | 1435.452958 | 1435.008704 |          |
| B-TS6          | 0.420061 | -           | -           | -           | -679.80  |
|                |          | 1508.316876 | 1510.280201 | 1509.86014  |          |
| B-TS6iso       | 0.420737 | -           | -           | -           | -481.00  |
|                |          | 1508.315434 | 1510.280623 | 1509.859886 |          |
| B-TS7          | 0.537313 | -           | -           | -           | -1325.40 |
|                |          | 1854.659719 | 1857.120987 | 1856.583674 |          |
| B-TS8          | 0.539475 | -           | -           | -           | -1558.04 |
|                |          | 1854.683275 | 1857.14545  | 1856.605975 |          |
| B-TS9          | 0.546455 | -           | -           | -           | -1594.56 |
|                |          | 1741.664789 | 1744.015659 | 1743.469204 |          |
| B-TS10         | 0.445587 | -           | -           | -           | -782.16  |
|                |          | 1433.554095 | 1435.476315 | 1435.030728 |          |
| B-TS12         | 0.445176 | -           | -           | -           | -682.69  |
|                |          | 1433.534311 | 1435.451984 | 1435.006808 |          |
| active species |          |             |             |             |          |
| <b>A-IM0</b>   |          |             |             |             |          |
| A-IM0          | 0.336215 | -           | -           | -           |          |
|                |          | 1660.92276  | 1662.62215  | 1662.28593  |          |

|       |          |            |            |            |          |
|-------|----------|------------|------------|------------|----------|
| A-TS1 | 0.330307 | -          | -          | -          | -758.42  |
| A-IM1 | 0.335282 | 1660.89268 | 1662.58194 | 1662.25163 |          |
| A-TS2 | 0.329619 | -          | -          | -          | -751.42  |
| A-TS3 | 0.326528 | 1660.87963 | 1662.57204 | 1662.24242 |          |
| A-IM2 | 0.330542 | -          | -          | -          | -691.32  |
| A-IM3 | 0.236254 | 1660.88886 | 1662.57809 | 16562.2516 |          |
| A-TS4 | 0.426757 | -          | -          | -          | -527.28  |
| A-IM4 | 0.431392 | 1660.91564 | 1662.60722 | 1662.27668 |          |
| A-TS5 | 0.429031 | 1315.71641 | 1316.93732 | 1316.70107 |          |
| A-IM5 | 0.430985 | -          | -1971.1237 | 1970.69695 |          |
| A-TS6 | 0.429691 | 1969.00134 | 1971.15173 | 1970.72033 |          |
| A-IM6 | 0.437844 | 1969.02502 | 1971.11339 | 1970.68436 | -1594.54 |
| A-TS7 | 0.436279 | 1968.99069 | 1971.13985 | 1970.70886 |          |
| A-IM7 | 0.437999 | 1969.01181 | 1971.09149 | -1970.6618 | -901.99  |
| A-TS8 | 0.426429 | 1969.03174 | 1971.15713 | 1970.71929 |          |
| A-IM8 | 0.217075 | 1969.03185 | 1971.15498 | -1970.7187 | -435.66  |
| A-TS9 | 0.425812 | 1969.02995 | 1971.15511 | 1970.71711 |          |
|       |          | 1969.02995 | 1971.15511 | 1970.71711 |          |
|       |          | 1314.50901 | 1315.71103 | 1315.49396 |          |
|       |          | -          | -          | -          | -1594.54 |
|       |          | 1968.98907 | 1971.11214 | 1970.68571 |          |
|       |          | -          | -          | -          | -869.65  |
|       |          | 1968.97402 | 1971.09474 | 1970.66893 |          |

- The  $\Delta G_{TS}$  and  $G_C$  designate the Gibbs Free Energy at the M06-L/def2-SVP level.
- The  $\Delta G_{IM}$  and  $G(\text{gas})$  designate Gibbs Free Energy in the gas phase at the M06-L/def2-SVP level.
- The  $E_{SP} + G_{SOL}$  designates the sum of single point energy at the M06-L/def2-TZVP level and the solvation free energy calculated by SMD continuum solvent mode.
- The **Final G** designates the sum of  $E_{SP} + G_{SOL}$  and  $G_C$ .
- The  $i$  designates the imaginary frequency of transition states

## 8. The cartesian coordinates for all structures

|                  |             |             |             |                      |             |             |             |      |             |             |             |
|------------------|-------------|-------------|-------------|----------------------|-------------|-------------|-------------|------|-------------|-------------|-------------|
| H <sub>2</sub> O |             |             |             | 1                    | -2.43259500 | 1.89867000  | 0.00000000  | 1    | -3.59663000 | 0.77935900  | 0.00047600  |
| 8                | 0.00000000  | 0.00000000  | 0.12029300  | 6                    | 1.99022500  | 0.46509700  | 0.00000000  | 8    | -2.21183200 | -1.30656700 | 0.00004500  |
| 1                | 0.00000000  | 0.75134400  | -0.48117200 | 1                    | 2.26723400  | 1.55485400  | 0.00000000  |      |             |             |             |
| 1                | 0.00000000  | -0.75134400 | -0.48117200 | 8                    | 2.83894900  | -0.39498600 | 0.00000000  |      |             |             |             |
| KCl              |             |             |             | Ph-COCH <sub>3</sub> |             |             |             | BnOH |             |             |             |
| 17               | 0.00000000  | 0.00000000  | -1.41076900 | 6                    | 1.81869100  | 1.27440000  | 0.00002700  | 6    | 1.35366100  | -1.35155900 | 0.00008600  |
| 19               | 0.00000000  | 0.00000000  | 1.26226700  | 6                    | 0.42788100  | 1.19271900  | 0.00004800  | 6    | -0.00944000 | -1.05276300 | 0.00021500  |
|                  |             |             |             | 6                    | -0.21077400 | -0.05556700 | 0.00002800  | 6    | -0.44038800 | 0.27575000  | 0.00015600  |
|                  |             |             |             | 6                    | 0.57137300  | -1.21991700 | -0.00001200 | 6    | 0.51639400  | 1.29862400  | -0.00003400 |
| PhCHO            |             |             |             | 6                    | 1.95858400  | -1.13923800 | -0.00004500 | 6    | 1.87587500  | 1.00041000  | -0.00016600 |
| 6                | -2.21295500 | -0.25051500 | 0.00000000  | 6                    | 2.58506300  | 0.10934700  | -0.00002300 | 6    | 2.30022900  | -0.32946100 | -0.00010600 |
| 6                | -1.32365500 | -1.32988200 | 0.00000000  | 1                    | 2.30758900  | 2.25117200  | 0.00005300  | 1    | 1.67772700  | -2.39532800 | 0.00013300  |
| 6                | 0.04620800  | -1.09975600 | 0.00000000  | 1                    | -0.16209000 | 2.11245100  | 0.00010100  | 1    | -0.75545100 | -1.84857000 | 0.00033100  |
| 6                | 0.53568300  | 0.21472700  | 0.00000000  | 1                    | 0.05357100  | -2.18170800 | -0.00001500 | 1    | 0.18888400  | 2.34333400  | -0.00009100 |
| 6                | -0.36017400 | 1.29073000  | 0.00000000  | 1                    | 2.55962200  | -2.05150700 | -0.00008600 | 1    | 2.60973300  | 1.81004700  | -0.00032400 |
| 6                | -1.73325600 | 1.05971600  | 0.00000000  | 1                    | 3.67575900  | 0.17408000  | -0.00004100 | 1    | 3.36688200  | -0.56555400 | -0.00021400 |
| 1                | -3.29010300 | -0.43444900 | 0.00000000  | 6                    | -1.69861700 | -0.20408900 | 0.00007400  | 6    | -1.90094800 | 0.62183200  | 0.00034400  |
| 1                | -1.70843300 | -2.35230600 | 0.00000000  | 6                    | -2.53535300 | 1.04745100  | -0.00006900 | 1    | -2.11554900 | 1.25846300  | 0.88415300  |
| 1                | 0.76802100  | -1.92036800 | 0.00000000  | 1                    | -2.32176400 | 1.66952100  | 0.88106200  | 1    | -2.11549000 | 1.25973700  | -0.88255900 |
| 1                | 0.03182400  | 2.31278900  | 0.00000000  | 1                    | -2.32249200 | 1.66853200  | -0.88208700 | 8    | -2.67810600 | -0.54405000 | -0.00050100 |
|                  |             |             |             |                      |             |             |             | 1    | -3.60418300 | -0.28671900 | -0.00038900 |

|                 |             |             |             |                           |             |             |             |          |             |             |             |
|-----------------|-------------|-------------|-------------|---------------------------|-------------|-------------|-------------|----------|-------------|-------------|-------------|
|                 |             |             |             | 1                         | -5.88555500 | -0.06285800 | 0.92345600  | 6        | 3.81332800  | -1.06600900 | -0.00005300 |
| Dihydrochalcone |             |             |             | 1                         | -5.64023200 | 1.81523700  | -0.69673000 | 6        | 3.98932800  | 1.70412000  | -0.00006800 |
| 6               | 4.78349200  | 1.19108800  | 0.14607100  | 8                         | 1.17196100  | -2.05799100 | -0.80453300 | 1        | 1.84088100  | 1.70286100  | 0.00024800  |
| 6               | 4.73440300  | -0.11104000 | -0.34713000 | 1                         | -0.04226800 | 0.31704700  | 1.21983100  | 6        | 5.06030300  | -0.45000000 | -0.00023500 |
| 6               | 3.52309400  | -0.79577200 | -0.40880300 | 1                         | -1.35391500 | -2.11516400 | -0.20441700 | 1        | 3.74772600  | -2.15831000 | -0.00005500 |
| 6               | 2.33281900  | -0.19194100 | 0.02772400  | 1                         | 0.33617300  | -2.53853000 | -0.77003000 | 6        | 5.15450300  | 0.94298200  | -0.00024600 |
| 6               | 2.39468700  | 1.12602300  | 0.51103900  |                           |             |             |             | 1        | 4.04825400  | 2.79533300  | -0.00007500 |
| 6               | 3.60519600  | 1.80642500  | 0.57305800  | Dihydrochalcone enol form |             |             |             | 1        | 5.96696700  | -1.05999800 | -0.00037400 |
| 1               | 5.73315900  | 1.72888900  | 0.19223100  | 6                         | -4.99234000 | 1.07382100  | -0.00015800 | 1        | 6.13226700  | 1.42998000  | -0.00039200 |
| 1               | 5.64906400  | -0.60156400 | -0.68867200 | 6                         | -4.93079700 | -0.32147300 | -0.00031200 | 8        | -1.19515600 | -2.18217600 | 0.00005200  |
| 1               | 3.48802300  | -1.81506300 | -0.79453200 | 6                         | -3.69755600 | -0.96206200 | -0.00020100 | 1        | 0.05726500  | 0.51143700  | -0.87252500 |
| 1               | 1.48091400  | 1.63397300  | 0.82658100  | 6                         | -2.50735800 | -0.21961500 | 0.00007000  | 1        | 0.05714900  | 0.51136500  | 0.87296400  |
| 1               | 3.62837500  | 2.83178100  | 0.94945300  | 6                         | -2.50735800 | -0.21961500 | 0.00007000  | 1        | 1.26164900  | -1.71741400 | 0.86494400  |
| 6               | 1.06464800  | -0.93936600 | -0.03854500 | 6                         | -2.58054700 | 1.18105800  | 0.00019600  |          |             |             |             |
| 6               | -0.07276100 | -0.57852000 | 0.59693700  | 6                         | -3.81644200 | 1.82353500  | 0.00009100  | Chalcone |             |             |             |
| 6               | -1.38058000 | -1.29430800 | 0.53936200  | 1                         | -5.96118700 | 1.57885200  | -0.00024400 | 6        | -5.00082300 | 1.02386200  | -0.00019600 |
| 1               | -1.58716800 | -1.80713000 | 1.49636500  | 1                         | -5.85197200 | -0.90868000 | -0.00052600 | 6        | -4.90483700 | -0.36963600 | -0.00160800 |
| 6               | -2.56231900 | -0.41176100 | 0.20940800  | 1                         | -3.61965600 | -2.05145700 | -0.00031800 | 6        | -3.65703700 | -0.97983100 | -0.00139300 |
| 6               | -2.43733200 | 0.64941200  | -0.69548500 | 1                         | -1.66790200 | 1.78145400  | 0.00035400  | 6        | -2.48069200 | -0.21321800 | 0.00013500  |
| 6               | -3.81600600 | -0.65231300 | 0.78417100  | 1                         | -3.86306300 | 2.91477100  | 0.00019600  | 6        | -2.59087900 | 1.18552400  | 0.00156100  |
| 6               | -3.53548000 | 1.44316400  | -1.02128500 | 6                         | -1.21255800 | -0.96538200 | 0.00012500  | 6        | -3.84214300 | 1.79870300  | 0.00143300  |
| 1               | -1.46059100 | 0.85275700  | -1.14484000 | 6                         | 0.07083300  | -0.16569600 | 0.00019400  | 1        | -5.98112500 | 1.50635500  | -0.00034200 |
| 6               | -4.91646700 | 0.13961400  | 0.46094700  | 6                         | 1.30721000  | -1.03471400 | 0.00028800  | 1        | -5.81121900 | -0.97955700 | -0.00286600 |
| 1               | -3.92861300 | -1.47267700 | 1.49971500  | 1                         | 1.26158500  | -1.71766800 | -0.86417400 | 1        | -3.55317000 | -2.06675800 | -0.00239800 |
| 6               | -4.77991300 | 1.19103400  | -0.44452800 | 6                         | 2.62774400  | -0.31421200 | 0.00012000  | 1        | -1.69946500 | 1.81485700  | 0.00295900  |
| 1               | -3.41793800 | 2.26680600  | -1.72978200 | 6                         | 2.73956200  | 1.08112600  | 0.00011500  |          |             |             |             |

|                   |             |             |             |                   |             |             |             |            |             |             |             |
|-------------------|-------------|-------------|-------------|-------------------|-------------|-------------|-------------|------------|-------------|-------------|-------------|
| 1                 | -3.91241100 | 2.88874800  | 0.00262000  | 6                 | 0.68412400  | 1.25340000  | -0.50769500 | 8          | -0.30241500 | -0.00048100 | -0.00003600 |
| 6                 | -1.17905200 | -0.95209200 | 0.00031000  | 1                 | 0.65031700  | 1.31174600  | -1.60526000 | 19         | -2.54586300 | -0.00009200 | 0.00000700  |
| 6                 | 0.08156100  | -0.18240800 | 0.00000600  | 1                 | 0.20638700  | 2.15537200  | -0.10142700 |            |             |             |             |
| 6                 | 1.26911300  | -0.82541900 | 0.00046000  | 1                 | 1.74464600  | 1.27273700  | -0.21253900 |            |             |             |             |
| 1                 | 1.21561500  | -1.92115700 | 0.00116800  | 6                 | -1.47831300 | 0.00042200  | -0.35307500 | Toluene    |             |             |             |
| 6                 | 2.59956800  | -0.24209700 | 0.00011200  | 1                 | -1.97765700 | -0.88631200 | 0.05974000  | C          | 1.19840800  | -1.20386800 |             |
| 6                 | 2.82859700  | 1.14798700  | -0.00085900 | 1                 | -1.97709300 | 0.88758400  | 0.05949800  | 0.00207400 |             |             |             |
| 6                 | 3.71787000  | -1.09646500 | 0.00075200  | 1                 | -1.61652900 | 0.00031200  | -1.44265000 | C          | 1.90194800  | -0.00005500 |             |
| 6                 | 4.12053300  | 1.65652900  | -0.00117600 | 8                 | 0.01652500  | 0.00010800  | 1.44455400  | 0.00863600 |             |             |             |
| 1                 | 1.98036700  | 1.83638700  | -0.00138100 | 1                 | 0.94091600  | -0.00007900 | 1.71710000  | C          | 1.19853600  | 1.20380000  |             |
| 6                 | 5.01268100  | -0.58704500 | 0.00043600  |                   |             |             |             | 0.00207200 |             |             |             |
| 1                 | 3.55449200  | -2.17748200 | 0.00150300  |                   |             |             |             | C          | -0.19506600 | 1.20117200  | -           |
| 6                 | 5.21869500  | 0.79182400  | -0.00053100 | <sup>t</sup> BuOK |             |             |             | 0.00894100 |             |             |             |
| 1                 | 4.27784200  | 2.73748600  | -0.00193600 | 6                 | 1.60481800  | -0.76387800 | 1.22176600  | C          | -0.91692200 | 0.00007900  | -           |
| 1                 | 5.86587500  | -1.26892700 | 0.00094500  | 6                 | 1.06123500  | 0.00001600  | 0.00001600  | 0.01180600 |             |             |             |
| 1                 | 6.23359300  | 1.19565500  | -0.00078400 | 1                 | 1.23735800  | -0.29701100 | 2.14931300  | C          | -0.19516100 | -1.20111900 | -           |
| 8                 | -1.17167900 | -2.17646800 | 0.00058000  | 1                 | 1.23815400  | -1.80248000 | 1.20759100  | 0.00894700 |             |             |             |
| 1                 | 0.04411100  | 0.90883900  | -0.00077500 | 1                 | 2.70696500  | -0.79376500 | 1.27053600  | H          | 1.73891600  | -2.15367500 |             |
|                   |             |             |             | 6                 | 1.60475500  | -0.67594800 | -1.27252200 | 0.00166700 |             |             |             |
|                   |             |             |             | 6                 | 1.60378400  | 1.44040900  | 0.05076800  | H          | 2.99433600  | -0.00011200 |             |
| <sup>t</sup> BuOH |             |             |             | 1                 | 1.23746600  | -0.14475500 | -2.16487100 | 0.01425400 |             |             |             |
| 6                 | -0.00609400 | 0.00000200  | 0.01623600  | 1                 | 2.70690200  | -0.70269700 | -1.32332600 | H          | 1.73911500  | 2.15356500  |             |
| 6                 | 0.68334900  | -1.25390200 | -0.50752000 | 1                 | 1.23789100  | -1.71290800 | -1.33147200 | 0.00164200 |             |             |             |
| 1                 | 0.20499100  | -2.15552200 | -0.10120600 | 1                 | 2.70589200  | 1.49856700  | 0.05301200  | H          | -0.73845200 | 2.15078900  | -           |
| 1                 | 0.64958400  | -1.31232800 | -1.60508100 | 1                 | 1.23644400  | 2.00969100  | -0.81774500 | 0.01835800 |             |             |             |
| 1                 | 1.74383500  | -1.27390800 | -0.21227900 | 1                 | 1.23608300  | 1.94737000  | 0.95694200  | H          | -0.73862100 | -2.15069800 | -           |

|            |             |             |             |         |             |             |             |   |             |             |             |
|------------|-------------|-------------|-------------|---------|-------------|-------------|-------------|---|-------------|-------------|-------------|
| 0.01836600 |             |             |             | O       | -3.46855400 | -1.21021300 | -0.00013900 | 8 | -1.61125300 | 2.45518100  | -1.16600800 |
| C          | -2.41377300 | 0.00003700  |             | H       | -2.79215200 | -1.95721800 | 0.00000400  | 6 | -0.32423700 | 2.38333300  | -0.92548900 |
| 0.00842300 |             |             |             | C       | 2.02259800  | 0.36781200  | 1.24691100  | 6 | 0.47553800  | 3.53316100  | -1.16651800 |
| H          | -2.83082600 | 0.89004900  | -           | C       | 2.02250700  | 0.36776700  | -1.24701700 | 1 | -0.01418900 | 4.42316600  | -1.56130300 |
| 0.48122700 |             |             |             | C       | 3.29094700  | 1.20346600  | 1.25184600  | 6 | 1.80224600  | 3.49542300  | -0.84074900 |
| H          | -2.83087400 | -0.88610100 | -           | H       | 2.30057800  | -0.69274800 | 1.32705800  | 1 | 2.42390000  | 4.38732400  | -0.95479300 |
| 0.48821000 |             |             |             | H       | 1.36155800  | 0.60065800  | 2.09338900  | 6 | 2.40575800  | 2.29638800  | -0.37402100 |
| H          | -2.80140600 | -0.00409800 |             | C       | 3.29085400  | 1.20341400  | -1.25210700 | 6 | 1.57356300  | 1.14524700  | -0.26581800 |
| 1.03953300 |             |             |             | H       | 2.30043600  | -0.69280600 | -1.32714000 | 6 | 3.77141400  | 2.21439400  | -0.02542800 |
|            |             |             |             | H       | 1.36139900  | 0.60056300  | -2.09345900 | 1 | 4.39701600  | 3.10521700  | -0.11296500 |
|            |             |             |             | C       | 4.11412400  | 0.94585400  | -0.00015800 | 6 | 4.28840600  | 1.01403300  | 0.41576900  |
| pre-IM0    |             |             |             | H       | 3.85824800  | 0.92448700  | 2.15272900  | 1 | 5.33748000  | 0.94241500  | 0.71014500  |
| C          | 0.81125300  | 2.93220000  | 0.00014400  | H       | 3.07772000  | 2.27806400  | 1.37013200  | 6 | 3.49591000  | -0.14336700 | 0.42560400  |
| C          | 0.31395500  | 1.63487000  | 0.00007500  | H       | 3.85807100  | 0.92442300  | -2.15303600 | 1 | 3.95377400  | -1.09330200 | 0.70580100  |
| C          | -1.08958300 | 1.43276600  | 0.00007600  | H       | 3.07757100  | 2.27799800  | -1.37037900 | 6 | 2.15544000  | -0.12908100 | 0.03652800  |
| C          | -1.94865600 | 2.57203700  | 0.00004200  | H       | 5.03082600  | 1.55376100  | -0.00020200 | 8 | -2.35417800 | -0.04162000 | -0.95054400 |
| C          | -1.40334500 | 3.87085500  | 0.00010300  | H       | 4.44081200  | -0.10860300 | -0.00014200 | 1 | -2.02682200 | 1.52889900  | -1.12219800 |
| C          | -0.03790900 | 4.04954900  | 0.00017300  | N       | 1.18626800  | 0.46766400  | -0.00002300 | 6 | -3.56579000 | -0.47184000 | -0.34671800 |
| H          | 1.88464800  | 3.09879800  | 0.00018000  | Pd      | -0.06843100 | -1.29876700 | 0.00011400  | 6 | -3.19208000 | -1.26377100 | 0.92020500  |
| C          | -3.35114800 | 2.34323800  | -0.00012200 | Cl      | 1.78786400  | -2.71616400 | -0.00010300 | 1 | -4.08315200 | -1.55508200 | 1.49676200  |
| H          | -2.08392200 | 4.72535400  | 0.00005700  | Cl      | -1.38299400 | -3.24162500 | 0.00009000  | 1 | -2.62911600 | -2.17889800 | 0.68768800  |
| H          | 0.39332400  | 5.05185100  | 0.00021700  | N       | -1.59396300 | 0.14785300  | 0.00005800  | 1 | -2.64096800 | -0.66358000 | 1.70083300  |
| C          | -3.82904200 | 1.07031600  | -0.00031700 |         |             |             |             | 6 | -4.28713900 | -1.37293100 | -1.33457300 |
| C          | -2.91955600 | -0.03059300 | -0.00014800 |         |             |             |             | 1 | -5.23477700 | -1.74971400 | -0.92116900 |
| H          | -4.03084400 | 3.19850500  | -0.00013300 | pre-IM1 |             |             |             | 1 | -4.51374400 | -0.81975700 | -2.25605600 |
| H          | -4.89293400 | 0.83435700  | -0.00044700 | 7       | 0.21732800  | 1.26487900  | -0.43575800 | 1 | -3.65800800 | -2.23161200 | -1.60576900 |

|         |             |             |             |   |             |             |             |         |             |             |             |
|---------|-------------|-------------|-------------|---|-------------|-------------|-------------|---------|-------------|-------------|-------------|
| 6       | -4.42205100 | 0.73544700  | 0.02595600  | 8 | -1.85766900 | 2.15702800  | -1.15638100 | 6       | -4.36306200 | 0.65871200  | 0.19878500  |
| 1       | -5.37653300 | 0.44203900  | 0.48735500  | 6 | -0.60961800 | 2.25970300  | -0.90625000 | 1       | -5.30762000 | 0.38326600  | 0.68859700  |
| 1       | -3.89005700 | 1.38852300  | 0.73477400  | 6 | 0.07233700  | 3.50449200  | -1.11721900 | 1       | -3.74283900 | 1.19470100  | 0.93294000  |
| 1       | -4.65013000 | 1.33059200  | -0.86958600 | 1 | -0.51983900 | 4.33487300  | -1.50262000 | 1       | -4.59546000 | 1.35946900  | -0.61448000 |
| 6       | 1.70668900  | -2.43211100 | 0.78694200  | 6 | 1.38414000  | 3.63057600  | -0.77174300 | 6       | 2.06875800  | -2.29470100 | 0.73681700  |
| 6       | 0.72855300  | -1.63719600 | -1.28998600 | 1 | 1.88908300  | 4.59639600  | -0.86245500 | 6       | 0.94789100  | -1.58347700 | -1.29509100 |
| 6       | 2.55673500  | -3.46187700 | 0.05160400  | 6 | 2.13561500  | 2.50886700  | -0.31574200 | 6       | 3.02615700  | -3.19025300 | -0.04180100 |
| 1       | 0.74939200  | -2.90091700 | 1.08674900  | 6 | 1.45512400  | 1.26092500  | -0.23347400 | 1       | 1.18529700  | -2.88779800 | 1.04169500  |
| 1       | 2.16861400  | -2.08256200 | 1.72029900  | 6 | 3.50068000  | 2.59384200  | 0.02379300  | 1       | 2.50431100  | -1.91277300 | 1.66983300  |
| 6       | 1.58549700  | -2.60604100 | -2.09341500 | 1 | 4.00790500  | 3.55808400  | -0.05467800 | 6       | 1.89888200  | -2.41932400 | -2.14242200 |
| 1       | -0.24915600 | -2.10409200 | -1.06147500 | 6 | 4.17469300  | 1.46079100  | 0.43706400  | 1       | 0.04427200  | -2.17728200 | -1.05379700 |
| 1       | 0.49780200  | -0.72928500 | -1.86149900 | 1 | 5.22697600  | 1.51882700  | 0.72253700  | 1       | 0.59378600  | -0.69968200 | -1.84012000 |
| 6       | 1.90897300  | -3.84510600 | -1.27148600 | 6 | 3.53666300  | 0.21415500  | 0.42321000  | 6       | 2.40015100  | -3.62406800 | -1.35976600 |
| 1       | 2.70380300  | -4.34662700 | 0.69039300  | 1 | 4.11366300  | -0.67682700 | 0.67614500  | 1       | 3.30089200  | -4.06266800 | 0.57127900  |
| 1       | 3.56326900  | -3.05181200 | -0.14063100 | 6 | 2.20127000  | 0.06679400  | 0.03766700  | 1       | 3.96630500  | -2.64865800 | -0.24445200 |
| 1       | 1.06551000  | -2.87438800 | -3.02618600 | 8 | -2.39903800 | -0.18872300 | -0.95541900 | 1       | 1.39279900  | -2.73145200 | -3.06921400 |
| 1       | 2.51978200  | -2.09844800 | -2.39293600 | 1 | -2.24158000 | 0.98512900  | -1.11699100 | 1       | 2.75193300  | -1.78905300 | -2.45052600 |
| 1       | 2.55133700  | -4.53772300 | -1.83661200 | 6 | -3.64127800 | -0.57199400 | -0.33353000 | 1       | 3.11222600  | -4.21405000 | -1.95694400 |
| 1       | 0.97225900  | -4.39686000 | -1.07033800 | 6 | -3.27410100 | -1.51855500 | 0.81474800  | 1       | 1.54834200  | -4.29760100 | -1.15218000 |
| 7       | 1.37371400  | -1.27578800 | -0.02787100 | 1 | -4.16494700 | -1.86626700 | 1.35888500  | 7       | 1.57783800  | -1.17205200 | -0.04278700 |
| 46      | -1.10777400 | 0.06409300  | 0.64423500  | 1 | -2.73129200 | -2.40331500 | 0.45393300  | 46      | -1.08287300 | -0.11693000 | 0.64952800  |
| 17      | 0.09564300  | 0.17420300  | 2.64383900  | 1 | -2.67963600 | -1.02292500 | 1.62788100  | 17      | 0.10917200  | -0.04305600 | 2.62932100  |
|         |             |             |             | 6 | -4.46958000 | -1.29341500 | -1.38024100 |         |             |             |             |
|         |             |             |             | 1 | -5.42733700 | -1.63722100 | -0.96310800 |         |             |             |             |
|         |             |             |             | 1 | -4.68756200 | -0.62461200 | -2.22358200 | pre-IM2 |             |             |             |
| pre-TS1 |             |             |             | 1 | -3.92848200 | -2.16461500 | -1.77263800 | 6       | -3.50057400 | 0.49505500  | -0.31154100 |
| 7       | 0.09792900  | 1.21089600  | -0.41394200 |   |             |             |             |         |             |             |             |

|   |             |             |             |         |             |             |             |   |             |             |             |
|---|-------------|-------------|-------------|---------|-------------|-------------|-------------|---|-------------|-------------|-------------|
| 6 | -2.12849900 | 0.41384700  | -0.10351700 | 1       | -3.99558100 | -1.78281100 | 1.07581500  | 6 | 0.66727300  | 1.43069100  | 0.40498600  |
| 6 | -1.36520700 | 1.60062800  | 0.00071800  | 1       | -3.99003600 | -3.89950500 | -0.24629500 | 6 | -0.72733600 | 1.53462500  | 0.12603700  |
| 6 | -2.02727600 | 2.85930000  | -0.10538900 | 1       | -2.25120200 | -4.06884900 | -0.00440800 | 6 | -1.36588100 | 2.79684700  | 0.32086200  |
| 6 | -3.41583700 | 2.90224200  | -0.31717600 | 7       | -1.41386600 | -0.86170000 | 0.02164900  | 6 | -0.65094600 | 3.85923600  | 0.90199100  |
| 6 | -4.14725400 | 1.73495100  | -0.42073100 | 46      | 0.65819200  | -0.41871000 | 0.28979000  | 6 | 0.67552900  | 3.70682700  | 1.26544500  |
| 1 | -4.09834100 | -0.40867000 | -0.39205100 | 17      | 1.24196900  | -2.71291800 | 0.38673700  | 1 | 2.39068900  | 2.40370100  | 1.24582600  |
| 6 | -1.22137500 | 4.03105700  | 0.01441500  | 7       | -0.01377600 | 1.51321800  | 0.20171400  | 6 | -2.74388500 | 2.87409600  | -0.05276700 |
| 1 | -3.90368700 | 3.87702200  | -0.39700700 | 6       | 3.71645500  | -0.12617500 | -0.42162400 | 1 | -1.17317300 | 4.80479800  | 1.07954900  |
| 1 | -5.22560800 | 1.76537100  | -0.58434800 | 6       | 4.64703700  | 1.07728900  | -0.37869200 | 1 | 1.22236700  | 4.52414000  | 1.74092800  |
| 6 | 0.11398200  | 3.92414900  | 0.22882200  | 1       | 4.12671000  | 2.00399700  | -0.65475500 | 6 | -3.35661900 | 1.80249500  | -0.61564400 |
| 6 | 0.76735400  | 2.63342800  | 0.34198900  | 1       | 5.06660700  | 1.21014500  | 0.62811400  | 6 | -2.66222000 | 0.53368800  | -0.87665300 |
| 1 | -1.70096700 | 5.01077500  | -0.06519300 | 1       | 5.48355600  | 0.92968300  | -1.07532000 | 1 | -3.28389800 | 3.81300200  | 0.11524600  |
| 1 | 0.76160200  | 4.79571400  | 0.33323200  | 6       | 3.05852800  | -0.26007800 | -1.78465100 | 1 | -4.39932500 | 1.83888800  | -0.94015500 |
| 8 | 1.99412500  | 2.55867500  | 0.56029100  | 1       | 3.81532700  | -0.38274800 | -2.57304400 | 8 | -3.17016100 | -0.35072700 | -1.54905400 |
| 6 | -1.49754100 | -1.69808400 | -1.22688700 | 1       | 2.39681400  | -1.13881200 | -1.80886300 | 6 | 2.52767000  | -0.18653600 | 0.75549000  |
| 6 | -1.82547600 | -1.63966100 | 1.24193300  | 1       | 2.46648800  | 0.63726300  | -2.02177600 | 6 | 1.55428700  | 0.12647800  | -1.46727100 |
| 6 | -2.77336300 | -2.50751800 | -1.38471000 | 6       | 4.45237900  | -1.39002300 | -0.02504300 | 6 | 3.83477600  | 0.45549700  | 0.29475400  |
| 1 | -0.64663000 | -2.39161300 | -1.17493600 | 1       | 4.89916600  | -1.27818000 | 0.97177500  | 1 | 2.60650000  | -1.28111600 | 0.65704800  |
| 1 | -1.32454800 | -1.01991500 | -2.07417100 | 1       | 3.77438300  | -2.25083400 | -0.00213200 | 1 | 2.32976200  | 0.00988600  | 1.81857700  |
| 6 | -3.10953500 | -2.43668100 | 1.09650900  | 1       | 5.26015100  | -1.59580000 | -0.74174000 | 6 | 2.77042300  | 0.92254700  | -1.90188000 |
| 1 | -0.99855400 | -2.33534000 | 1.44248100  | 8       | 2.68029800  | 0.10580000  | 0.59052400  | 1 | 1.69802800  | -0.93979200 | -1.70944500 |
| 1 | -1.86761400 | -0.92397600 | 2.07447300  | 1       | 2.52937400  | 1.10611800  | 0.65182600  | 1 | 0.63330900  | 0.44573800  | -1.97273600 |
| 6 | -3.05772300 | -3.32630600 | -0.13543800 |         |             |             |             | 6 | 4.01109200  | 0.37968200  | -1.21302300 |
| 1 | -2.63216000 | -3.16602600 | -2.25525500 |         |             |             |             | 1 | 4.65796000  | -0.06555300 | 0.80969400  |
| 1 | -3.63363700 | -1.87079700 | -1.64364300 |         |             |             |             | 1 | 3.91543100  | 1.50953700  | 0.60594500  |
| 1 | -3.22024100 | -3.04290600 | 2.00835000  |         |             |             |             | 1 | 2.86208000  | 0.86781400  | -2.99795800 |
|   |             |             |             | pre-IM3 |             |             |             |   |             |             |             |
|   |             |             |             | 6       | 1.33544800  | 2.49483400  | 0.99244300  |   |             |             |             |



|       |             |             |             |    |             |             |             |                      |             |             |             |
|-------|-------------|-------------|-------------|----|-------------|-------------|-------------|----------------------|-------------|-------------|-------------|
| 1     | 2.62966300  | 1.99065800  | -1.65524700 | 6  | -2.23979200 | -1.24900900 | -1.56695600 | 1                    | 7.11870200  | -1.05888200 | -1.11355000 |
| 1     | 4.91885500  | 0.91982600  | -1.52674900 | 6  | -2.64254800 | -1.53281000 | 0.84449700  | 1                    | 4.69092500  | -1.50103900 | -1.42132100 |
| 1     | 4.15628200  | -0.67260600 | -1.51694600 | 6  | -3.52988400 | -1.98426300 | -1.88737400 | 1                    | 3.77926700  | 2.44315200  | 0.04415700  |
| 7     | 1.30594200  | 0.18752400  | 0.00336100  | 1  | -1.40813500 | -1.97241400 | -1.54169700 | 6                    | 2.61307400  | 0.18619100  | -0.89931700 |
| 46    | -0.34245400 | -1.30075900 | 0.15592400  | 1  | -2.00249400 | -0.48116400 | -2.31642100 | 1                    | 2.16264500  | 0.94914300  | -1.56144100 |
| 17    | 1.10012100  | -3.13183400 | 0.56927400  | 6  | -3.93900700 | -2.27345600 | 0.56832500  | 1                    | 2.43029400  | -0.79806000 | -1.35313300 |
| 17    | -2.19953200 | -2.64817100 | 0.49099900  | 1  | -1.82411500 | -2.26549900 | 0.90658400  | 8                    | 1.92665300  | 0.20171200  | 0.36014000  |
| 7     | -1.38852000 | 0.43331400  | -0.31292000 | 1  | -2.66976800 | -0.97232700 | 1.78975200  | 1                    | 1.80830200  | 1.18134800  | 0.62445500  |
|       |             |             |             | 6  | -3.88407700 | -2.96832900 | -0.78345800 | 6                    | 0.92697600  | -2.98605500 | 0.75518100  |
|       |             |             |             | 1  | -3.38121500 | -2.51112900 | -2.84229000 | 6                    | 2.41379300  | -3.06592700 | 0.40096500  |
| B-IM0 |             |             |             | 1  | -4.35930700 | -1.28266600 | -2.07104400 | 1                    | 2.90666100  | -2.09566100 | 0.55032500  |
| 6     | -4.24860800 | 0.86779000  | -0.38743200 | 1  | -4.07778700 | -3.00797400 | 1.37668700  | 1                    | 2.94467200  | -3.80216700 | 1.02441200  |
| 6     | -2.88175500 | 0.71819800  | -0.18629400 | 1  | -4.81077300 | -1.60347900 | 0.63503000  | 1                    | 2.53736300  | -3.36304500 | -0.65134300 |
| 6     | -2.08510000 | 1.86528300  | 0.07162900  | 1  | -4.83217700 | -3.48216000 | -1.00168100 | 6                    | 0.30526900  | -4.38143100 | 0.65403500  |
| 6     | -2.70964500 | 3.14608300  | 0.12127900  | 1  | -3.10883400 | -3.75435100 | -0.74699400 | 1                    | 0.81359100  | -5.10604900 | 1.30838700  |
| 6     | -4.09575800 | 3.25526100  | -0.08797900 | 7  | -2.20617200 | -0.58145000 | -0.22574700 | 1                    | -0.75854700 | -4.35560700 | 0.93668500  |
| 6     | -4.85856600 | 2.13145200  | -0.34010600 | 46 | -0.12759200 | -0.23114200 | 0.12023800  | 1                    | 0.36711900  | -4.75219200 | -0.37918600 |
| 1     | -4.87084500 | -0.00140200 | -0.58685500 | 7  | -0.74116200 | 1.71641300  | 0.26788600  | 6                    | 0.77553900  | -2.45821800 | 2.18275000  |
| 6     | -1.86762200 | 4.26689100  | 0.38920700  | 6  | 5.87483200  | 1.91913700  | -0.02671300 | 1                    | 1.21165200  | -1.45225600 | 2.27298100  |
| 1     | -4.55673900 | 4.24555700  | -0.04702000 | 6  | 6.81425300  | 0.93949200  | -0.35323400 | 1                    | -0.28329600 | -2.40102800 | 2.47875600  |
| 1     | -5.93440100 | 2.21436200  | -0.50296200 | 6  | 6.38822800  | -0.28743800 | -0.85859300 | 1                    | 1.28729000  | -3.10792300 | 2.90954800  |
| 6     | -0.53436800 | 4.09565800  | 0.58890300  | 6  | 5.02684800  | -0.53489000 | -1.03333400 | 8                    | 0.22743900  | -2.18882200 | -0.17059400 |
| 6     | 0.07471900  | 2.78182600  | 0.53657900  | 6  | 4.07899200  | 0.44268800  | -0.71498300 |                      |             |             |             |
| 1     | -2.31660000 | 5.26336800  | 0.43270700  | 6  | 4.51637300  | 1.67477500  | -0.20911000 |                      |             |             |             |
| 1     | 0.13500100  | 4.93105200  | 0.79910600  | 1  | 6.20474700  | 2.88256900  | 0.36921100  | B-IM0 <sup>iso</sup> |             |             |             |
| 8     | 1.30393400  | 2.63192700  | 0.73468000  | 1  | 7.88017800  | 1.13378500  | -0.21235600 | 7                    | 1.78866600  | -1.11374000 | -0.57015500 |

|   |             |             |             |    |             |             |             |       |             |             |             |
|---|-------------|-------------|-------------|----|-------------|-------------|-------------|-------|-------------|-------------|-------------|
| 8 | 0.86275000  | -2.80829300 | -1.81510300 | 1  | 2.94768900  | 3.53748800  | -1.02498300 | 1     | -3.47254300 | -2.78198900 | 1.05942600  |
| 6 | 1.84591500  | -2.30928200 | -1.28939000 | 1  | 0.83791800  | 4.27386000  | 2.08181600  | 8     | -1.32835700 | -1.67491600 | 0.08719300  |
| 6 | 3.17561700  | -2.92519600 | -1.33971800 | 1  | 2.46698200  | 3.84704800  | 1.61891100  | 6     | -1.31695100 | -1.88412700 | 2.50313600  |
| 1 | 3.21444000  | -3.91027200 | -1.80868600 | 1  | 1.63460500  | 5.44945200  | -0.03508700 | 1     | -1.31257700 | -2.58985000 | 3.34748700  |
| 6 | 4.28920200  | -2.31305300 | -0.86541300 | 1  | 0.14421200  | 4.53877400  | -0.25382300 | 1     | -0.42699600 | -1.24000000 | 2.60386300  |
| 1 | 5.26706700  | -2.80060600 | -0.92715700 | 7  | 1.43542600  | 1.47652500  | 0.13616500  | 1     | -2.20800000 | -1.24543700 | 2.60810600  |
| 6 | 4.20880000  | -1.00143000 | -0.29811100 | 46 | 0.09219000  | -0.21040600 | 0.02590200  | 6     | -0.08813500 | -3.51912200 | 1.06720800  |
| 6 | 2.90919000  | -0.42668700 | -0.20588000 | 6  | -2.52124100 | 1.33994300  | -0.54188500 | 1     | -0.10778900 | -4.27874900 | 1.86318400  |
| 6 | 5.31576100  | -0.27244500 | 0.16731800  | 6  | -3.98923000 | 1.03260900  | -0.53550000 | 1     | -0.04735900 | -4.02044500 | 0.09290800  |
| 1 | 6.30508200  | -0.73526000 | 0.11798200  | 6  | -4.41135400 | -0.28154500 | -0.78169600 | 1     | 0.83910700  | -2.93729000 | 1.18450000  |
| 6 | 5.16295600  | 1.00408000  | 0.68242100  | 6  | -4.94592600 | 2.01563800  | -0.26807800 |       |             |             |             |
| 1 | 6.02553200  | 1.56074500  | 1.05217300  | 6  | -5.76548900 | -0.60273500 | -0.75485200 |       |             |             |             |
| 6 | 3.89267400  | 1.60135500  | 0.70247100  | 1  | -3.66291700 | -1.05532200 | -0.98670800 | B-IM1 |             |             |             |
| 1 | 3.79719600  | 2.62419600  | 1.06323700  | 6  | -6.30367100 | 1.69603800  | -0.25089600 | 7     | -0.64821800 | -1.61972100 | 0.34863700  |
| 6 | 2.77676800  | 0.90474000  | 0.25815400  | 1  | -4.62417100 | 3.04250600  | -0.07106300 | 8     | 1.28180800  | -2.28384500 | 1.40087000  |
| 8 | -1.85118300 | 0.70312300  | 0.55137700  | 6  | -6.71488200 | 0.38638800  | -0.49149400 | 6     | 0.19218700  | -2.57254700 | 0.92192400  |
| 6 | 1.25865100  | 2.20117500  | -1.15758000 | 1  | -6.08299800 | -1.63052400 | -0.94616700 | 6     | -0.31704700 | -3.94536600 | 0.88899600  |
| 6 | 0.96438300  | 2.30173500  | 1.28378000  | 1  | -7.04297700 | 2.47306200  | -0.04305600 | 1     | 0.36527500  | -4.70362600 | 1.27767900  |
| 6 | 1.85339600  | 3.59543600  | -1.15351300 | 1  | -7.77780800 | 0.13469300  | -0.47432300 | 6     | -1.54751400 | -4.26278200 | 0.41469600  |
| 1 | 0.17156500  | 2.26697800  | -1.33784000 | 1  | -2.06965800 | 1.00665400  | -1.49608500 | 1     | -1.89198000 | -5.30138700 | 0.39864400  |
| 1 | 1.67491500  | 1.56280300  | -1.94864100 | 1  | -2.34069500 | 2.42190200  | -0.44776100 | 6     | -2.42817800 | -3.23835200 | -0.05603200 |
| 6 | 1.41740400  | 3.75691400  | 1.30188400  | 1  | -2.07107700 | -0.28620400 | 0.50682100  | 6     | -1.92726700 | -1.90592500 | -0.03102000 |
| 1 | -0.13604600 | 2.27786900  | 1.23645200  | 6  | -1.30424500 | -2.60731300 | 1.15453400  | 6     | -3.72585400 | -3.47642400 | -0.53986700 |
| 1 | 1.24664900  | 1.77130800  | 2.20399100  | 6  | -2.58376900 | -3.42692800 | 0.99112400  | 1     | -4.08794100 | -4.50719800 | -0.58085000 |
| 6 | 1.22476900  | 4.42879400  | -0.04837700 | 1  | -2.59378100 | -3.92175500 | 0.01065200  | 6     | -4.52931500 | -2.43205800 | -0.96449700 |
| 1 | 1.68962500  | 4.05279000  | -2.14058300 | 1  | -2.66379800 | -4.19846600 | 1.77129800  | 1     | -5.53105500 | -2.62376800 | -1.35228600 |

|    |             |             |             |   |             |             |             |                      |             |             |             |
|----|-------------|-------------|-------------|---|-------------|-------------|-------------|----------------------|-------------|-------------|-------------|
| 6  | -4.06476100 | -1.11064800 | -0.86819900 | 1 | 4.64182800  | -0.10376900 | -2.59022700 | B-IM1 <sup>iso</sup> |             |             |             |
| 1  | -4.72720800 | -0.29724100 | -1.15942500 | 6 | 5.75652600  | -1.14804700 | 0.97360400  | 7                    | 1.85794300  | -1.12884800 | -0.51923000 |
| 6  | -2.78660300 | -0.84158200 | -0.39820600 | 1 | 3.64147600  | -1.45285400 | 1.36165900  | 8                    | 1.01966400  | -2.96656200 | -1.59325900 |
| 8  | 1.90573700  | 0.18768700  | -0.17989100 | 6 | 6.71518300  | -0.76929600 | 0.02995100  | 6                    | 1.98875500  | -2.36372900 | -1.14465400 |
| 6  | -2.64975400 | 0.99174200  | 1.20285400  | 1 | 7.05791400  | -0.09761100 | -1.99395600 | 6                    | 3.35433500  | -2.88897200 | -1.20223300 |
| 6  | -2.54883000 | 1.52124600  | -1.20009700 | 1 | 6.06937400  | -1.44494800 | 1.97817200  | 1                    | 3.45719200  | -3.88750400 | -1.63157100 |
| 6  | -4.07112200 | 1.51308900  | 1.26985100  | 1 | 7.77558200  | -0.76617000 | 0.29493000  | 6                    | 4.42837200  | -2.18271300 | -0.76612100 |
| 1  | -1.94914000 | 1.80470200  | 1.45930000  | 1 | 2.38448700  | -0.58968400 | -2.06218400 | 1                    | 5.43696800  | -2.60398600 | -0.82243100 |
| 1  | -2.46114800 | 0.17437500  | 1.91230500  | 1 | 2.11082400  | -1.78232500 | -0.76690400 | 6                    | 4.26444000  | -0.86124800 | -0.24166500 |
| 6  | -3.90959700 | 2.20600000  | -1.12753600 | 1 | 1.48897600  | 1.71719400  | -0.70552400 | 6                    | 2.93040900  | -0.36607400 | -0.17335600 |
| 1  | -1.76278600 | 2.28488600  | -1.09501500 | 6 | 0.94157000  | 3.30222300  | 0.36543800  | 6                    | 5.32148400  | -0.05124500 | 0.20511100  |
| 1  | -2.38361000 | 1.04142300  | -2.17474400 | 6 | 2.18623300  | 4.04267200  | -0.09778500 | 1                    | 6.33887000  | -0.45019300 | 0.17036400  |
| 6  | -4.25402700 | 2.65550300  | 0.28378700  | 1 | 2.03771100  | 4.47357900  | -1.09718100 | 6                    | 5.08395700  | 1.22590500  | 0.68545300  |
| 1  | -4.28096300 | 1.83810200  | 2.29974000  | 1 | 2.43821300  | 4.85861100  | 0.59355600  | 1                    | 5.90720400  | 1.84758800  | 1.04099300  |
| 1  | -4.78267900 | 0.69649400  | 1.05964400  | 1 | 3.05034600  | 3.36358500  | -0.14042100 | 6                    | 3.77746500  | 1.73985800  | 0.69178000  |
| 1  | -3.88295200 | 3.06581500  | -1.81436800 | 8 | 0.66337700  | 2.28111400  | -0.63690900 | 1                    | 3.61642900  | 2.76101400  | 1.03196900  |
| 1  | -4.70716100 | 1.55579600  | -1.51688600 | 6 | 1.17040900  | 2.64406300  | 1.71651100  | 6                    | 2.70993800  | 0.96388600  | 0.26013300  |
| 1  | -5.27788400 | 3.05585800  | 0.32183100  | 1 | 1.41800100  | 3.39453600  | 2.48094200  | 8                    | -1.69670300 | 0.63906700  | 0.41504200  |
| 1  | -3.59286500 | 3.49064900  | 0.57765200  | 1 | 0.27030300  | 2.10524600  | 2.05128000  | 6                    | 1.13938300  | 2.21076400  | -1.14655600 |
| 7  | -2.26035800 | 0.50104100  | -0.15318400 | 1 | 1.98804900  | 1.91186600  | 1.66494600  | 6                    | 0.80998000  | 2.22921800  | 1.30380700  |
| 46 | -0.10697100 | 0.27281200  | -0.08675700 | 6 | -0.26552100 | 4.21863800  | 0.38486600  | 6                    | 1.65724400  | 3.63426000  | -1.09434500 |
| 6  | 2.52400400  | -0.77855200 | -0.97556900 | 1 | -0.11088300 | 5.05162100  | 1.08414800  | 1                    | 0.05555900  | 2.22611100  | -1.34435200 |
| 6  | 3.99403900  | -0.78522800 | -0.64938200 | 1 | -0.45874700 | 4.63897300  | -0.61214800 | 1                    | 1.60715500  | 1.61891100  | -1.94511300 |
| 6  | 4.95792500  | -0.40001600 | -1.58481100 | 1 | -1.16754900 | 3.67963000  | 0.70954300  | 6                    | 1.18557700  | 3.70440000  | 1.35839100  |
| 6  | 4.40549900  | -1.15379500 | 0.63928700  |   |             |             |             | 1                    | -0.28543600 | 2.13018400  | 1.25139000  |
| 6  | 6.31373200  | -0.39632400 | -1.25105700 |   |             |             |             | 1                    | 1.12853400  | 1.69145400  | 2.20761400  |

|    |             |             |             |       |             |             |             |   |             |             |             |
|----|-------------|-------------|-------------|-------|-------------|-------------|-------------|---|-------------|-------------|-------------|
| 6  | 0.97112400  | 4.40107300  | 0.02430100  | 1     | -2.64342000 | -4.14336700 | 0.02673100  | 1 | -1.54027700 | -3.75330500 | 2.10837000  |
| 1  | 1.47334600  | 4.10558000  | -2.07132700 | 1     | -2.83033900 | -4.27683600 | 1.79264600  | 1 | -2.89121000 | -2.66837900 | 1.86630500  |
| 1  | 2.75203300  | 3.63801800  | -0.96016300 | 1     | -3.59141200 | -2.92936000 | 0.92131100  | 1 | -3.16935800 | -4.62980600 | 0.36580900  |
| 1  | 0.56732900  | 4.16774100  | 2.14232100  | 8     | -1.36854800 | -1.85112900 | -0.00577100 | 1 | -1.52997200 | -4.43552600 | -0.24377400 |
| 1  | 2.22378400  | 3.84761100  | 1.69394900  | 6     | -1.51731900 | -1.89825400 | 2.41690800  | 7 | -1.43640000 | -1.08077200 | -0.07915700 |
| 1  | 1.32562500  | 5.44141500  | 0.06957700  | 1     | -1.56474000 | -2.53950400 | 3.30819600  | 7 | -0.66380500 | 1.52472800  | -0.27877500 |
| 1  | -0.11070200 | 4.45726400  | -0.19211300 | 1     | -0.63226100 | -1.24927100 | 2.50835800  | 6 | -0.10482500 | 2.78031100  | -0.44773000 |
| 7  | 1.33289800  | 1.45574600  | 0.13257700  | 1     | -2.40441200 | -1.24819400 | 2.41441200  | 6 | -0.97276200 | 3.89546400  | -0.07923100 |
| 46 | 0.08605600  | -0.26089600 | -0.05909400 | 6     | -0.19484800 | -3.60061700 | 1.13800800  | 1 | -0.55153400 | 4.89437900  | -0.20622400 |
| 6  | -2.32084000 | 1.36913000  | -0.59157700 | 1     | -0.22636900 | -4.31890100 | 1.96911400  | 6 | -2.23219000 | 3.70590100  | 0.39634900  |
| 6  | -3.80442400 | 1.09572300  | -0.58176300 | 1     | -0.09841600 | -4.14439200 | 0.19130000  | 1 | -2.85910000 | 4.56170100  | 0.66514200  |
| 6  | -4.28897800 | -0.12477100 | -1.07160700 | 1     | 0.70544300  | -2.97984500 | 1.25722900  | 6 | -2.76906800 | 2.38871500  | 0.55822000  |
| 6  | -4.71224900 | 2.00262900  | -0.02859900 |       |             |             |             | 6 | -1.91596600 | 1.30719100  | 0.19447300  |
| 6  | -5.64659300 | -0.42905900 | -1.01234100 |       |             |             |             | 6 | -2.37643100 | -0.02839900 | 0.32655700  |
| 1  | -3.58888300 | -0.84188000 | -1.51491400 | B-IM2 |             |             |             | 6 | -3.65722400 | -0.26357700 | 0.81355100  |
| 6  | -6.07413900 | 1.70368700  | 0.03033700  | 6     | -1.87051000 | -1.86589000 | -1.27500300 | 1 | -4.03122600 | -1.27967700 | 0.92371600  |
| 1  | -4.34409000 | 2.95605800  | 0.36220400  | 6     | -1.00922300 | -1.99701100 | 1.02307000  | 6 | -4.49683000 | 0.80293200  | 1.17431400  |
| 6  | -6.54413400 | 0.48662600  | -0.45946400 | 6     | -2.89471800 | -2.94793300 | -0.98186600 | 1 | -5.49722600 | 0.59099600  | 1.55512400  |
| 1  | -6.00923200 | -1.38184600 | -1.40619200 | 1     | -0.95729100 | -2.33331900 | -1.67984200 | 6 | -4.05593400 | 2.10982200  | 1.04601400  |
| 1  | -6.77155900 | 2.42436800  | 0.46453400  | 1     | -2.22691800 | -1.14773800 | -2.02619200 | 1 | -4.70578000 | 2.94372500  | 1.32478000  |
| 1  | -7.61000600 | 0.25106700  | -0.41399600 | 6     | -2.00708200 | -3.09049000 | 1.36403800  | 6 | 2.54270900  | -0.50087600 | -1.30049300 |
| 1  | -1.92787100 | 1.10837200  | -1.60205100 | 1     | -0.06838300 | -2.46067400 | 0.68143400  | 1 | 2.94882200  | -0.27705500 | -2.31554200 |
| 1  | -2.15264000 | 2.46566600  | -0.47687900 | 1     | -0.76423200 | -1.37117900 | 1.89228800  | 8 | 1.74320000  | -1.55931400 | -1.22867900 |
| 1  | -2.02886400 | -1.13456700 | 0.15971800  | 6     | -2.40765800 | -3.87422800 | 0.12285900  | 1 | 1.88570500  | 0.56703500  | -1.24795300 |
| 6  | -1.43834100 | -2.74143700 | 1.15431500  | 1     | -3.07031800 | -3.50994900 | -1.91156400 | 6 | 3.58662000  | -0.31974500 | -0.22881000 |
| 6  | -2.69803200 | -3.57018200 | 0.96139800  | 1     | -3.86776400 | -2.50207700 | -0.72293100 | 6 | 3.72946100  | -1.28257600 | 0.77315600  |

|       |            |             |             |   |             |             |             |       |             |             |             |
|-------|------------|-------------|-------------|---|-------------|-------------|-------------|-------|-------------|-------------|-------------|
| 6     | 4.41888700 | 0.80486500  | -0.23033100 | 1 | 5.18608600  | -1.19150000 | -0.63519900 | 6     | -4.80032800 | -0.22803600 | 1.24491500  |
| 6     | 4.70254200 | -1.12746400 | 1.75823400  | 1 | 5.61650400  | -2.32329800 | 1.46679700  | 6     | -6.00606800 | -0.42123900 | -1.26706300 |
| 1     | 3.07036200 | -2.15394300 | 0.75539400  | 1 | 4.10594200  | -3.22437300 | 1.37369200  | 1     | -4.04762700 | -1.01782800 | -1.98344600 |
| 6     | 5.38708500 | 0.96137200  | 0.75795600  | 7 | 2.25103900  | -0.82771900 | -0.09022300 | 6     | -6.15095100 | 0.07009600  | 1.10129500  |
| 1     | 4.29306300 | 1.56942800  | -1.00322200 | 7 | 0.19043000  | 0.94780200  | 0.26865900  | 1     | -4.30585400 | -0.13302000 | 2.21494700  |
| 6     | 5.53258400 | -0.00616600 | 1.75328000  | 8 | -1.99164100 | 1.27380600  | 0.89241200  | 6     | -6.75429700 | -0.02994600 | -0.15365800 |
| 1     | 4.81699700 | -1.88750500 | 2.53509400  | 6 | -0.87245300 | 1.74464700  | 0.60420200  | 1     | -6.48372800 | -0.49537900 | -2.24655900 |
| 1     | 6.02977300 | 1.84472700  | 0.75450300  | 6 | -0.65262000 | 3.18573200  | 0.60637900  | 1     | -6.73733700 | 0.38628000  | 1.96665800  |
| 1     | 6.29410500 | 0.11563200  | 2.52714500  | 1 | -1.50479900 | 3.80525300  | 0.89153200  | 1     | -7.81618500 | 0.20175900  | -0.26636100 |
| 46    | 0.39228400 | -0.11557500 | -0.70309900 | 6 | 0.53698600  | 3.72487800  | 0.23314600  | 46    | 0.15632900  | -1.11707300 | -0.39988700 |
| 8     | 1.04071700 | 2.91155800  | -0.87900100 | 1 | 0.67597300  | 4.81010600  | 0.20178600  |       |             |             |             |
|       |            |             |             | 6 | 1.62942900  | 2.88152900  | -0.13684200 |       |             |             |             |
|       |            |             |             | 6 | 1.40090000  | 1.47739600  | -0.05534100 | B-IM4 |             |             |             |
| B-IM3 |            |             |             | 6 | 2.47869400  | 0.59342400  | -0.36113700 | 6     | -2.36017700 | -1.17501700 | -1.19732200 |
| 6     | 2.38370100 | -1.10616200 | 1.38168900  | 6 | 3.66881400  | 1.10570400  | -0.85310500 | 6     | -2.14703200 | -1.95008600 | 1.11042500  |
| 6     | 3.08952600 | -1.79030600 | -0.86930600 | 1 | 4.47942600  | 0.43833300  | -1.13760100 | 6     | -3.80928300 | -1.62798800 | -1.23279000 |
| 6     | 3.82366200 | -1.14805800 | 1.85057600  | 6 | 3.86042700  | 2.49147200  | -0.99348600 | 1     | -1.70679600 | -1.98136700 | -1.57648900 |
| 1     | 1.90387000 | -2.08188700 | 1.56111100  | 1 | 4.80651700  | 2.86400500  | -1.38991700 | 1     | -2.18044800 | -0.30192500 | -1.84028300 |
| 1     | 1.78638300 | -0.35118200 | 1.90913400  | 6 | 2.86318500  | 3.36671100  | -0.60839600 | 6     | -3.54838000 | -2.55416500 | 1.07143000  |
| 6     | 4.51456400 | -2.02187400 | -0.37370200 | 1 | 3.00846500  | 4.44755600  | -0.68742800 | 1     | -1.41504200 | -2.73635400 | 0.85349000  |
| 1     | 2.54970900 | -2.74539900 | -0.82172100 | 6 | -2.62876600 | -0.93591300 | 0.30253100  | 1     | -1.88114200 | -1.60361300 | 2.11957100  |
| 1     | 3.06243100 | -1.47024000 | -1.92006600 | 1 | -2.26564200 | -1.03030400 | 1.34078600  | 6     | -3.99081400 | -2.85450600 | -0.35241000 |
| 6     | 4.57253700 | -2.25383900 | 1.12703700  | 8 | -1.90449200 | -1.22695900 | -0.65980600 | 1     | -4.10250000 | -1.83675900 | -2.27290000 |
| 1     | 3.83494400 | -1.30061000 | 2.94005900  | 1 | 0.27969000  | -2.57443300 | -0.94734600 | 1     | -4.46354500 | -0.80743600 | -0.88649000 |
| 1     | 4.30634600 | -0.17117600 | 1.67266300  | 6 | -4.04619500 | -0.62313800 | 0.13207200  | 1     | -3.55133800 | -3.46834000 | 1.68485300  |
| 1     | 4.90854200 | -2.89272300 | -0.92001100 | 6 | -4.65441600 | -0.71306500 | -1.12823500 | 1     | -4.28297500 | -1.88162100 | 1.54360300  |

|   |             |             |             |       |             |             |             |    |             |             |             |
|---|-------------|-------------|-------------|-------|-------------|-------------|-------------|----|-------------|-------------|-------------|
| 1 | -5.03262200 | -3.20846000 | -0.36853400 | 1     | 2.76278600  | -1.90400900 | 1.79557000  | 1  | 0.23987400  | 5.17246600  | -0.51426500 |
| 1 | -3.38212700 | -3.68100100 | -0.76106100 | 6     | 5.29011400  | 0.62443600  | 0.27862900  | 1  | 1.51246900  | 3.97897100  | -0.74634900 |
| 7 | -1.90189400 | -0.84439800 | 0.17254700  | 1     | 4.30852900  | 0.22599700  | -1.60322200 | 7  | -0.33449100 | 1.26396600  | -0.09902900 |
| 7 | -0.29268300 | 1.22611100  | -0.62870900 | 6     | 5.33791200  | 0.33821500  | 1.64344400  | 7  | -1.21100200 | -1.40302400 | -0.15334900 |
| 6 | 0.44819900  | 2.19741000  | -1.14494100 | 1     | 4.47103800  | -0.80606800 | 3.25830600  | 6  | -1.55055700 | -2.75165100 | -0.25182800 |
| 6 | 0.11239500  | 3.56753800  | -1.01685700 | 1     | 6.00177400  | 1.32965900  | -0.15784100 | 6  | -2.96602900 | -3.06063100 | -0.06896100 |
| 1 | 0.75832700  | 4.31243300  | -1.48149200 | 1     | 6.08469800  | 0.81954900  | 2.27932300  | 1  | -3.23303100 | -4.11526600 | -0.15446100 |
| 6 | -0.98383900 | 3.90303700  | -0.26677100 | 46    | 0.48818500  | -0.75784600 | -0.48732300 | 6  | -3.88813800 | -2.10627500 | 0.20612400  |
| 1 | -1.24632400 | 4.95191900  | -0.10846200 | 8     | 1.56094700  | 1.86889900  | -1.78434800 | 1  | -4.94057300 | -2.36889100 | 0.35293400  |
| 6 | -1.78666000 | 2.89235500  | 0.32688300  |       |             |             |             | 6  | -3.50687100 | -0.73300300 | 0.31106100  |
| 6 | -1.42787800 | 1.53825100  | 0.06837700  |       |             |             |             | 6  | -2.12635000 | -0.42134400 | 0.10477900  |
| 6 | -2.23337600 | 0.47500200  | 0.58142600  | B-IM5 |             |             |             | 6  | -1.72530700 | 0.94672100  | 0.18101000  |
| 6 | -3.27138800 | 0.79741300  | 1.44436600  | 8     | -0.72020200 | -3.62870500 | -0.47157100 | 6  | -2.67150000 | 1.92208000  | 0.48340900  |
| 1 | -3.87499100 | 0.00088100  | 1.87964000  | 6     | 0.39683600  | 2.02149700  | 0.93796800  | 1  | -2.36660200 | 2.96583800  | 0.54305700  |
| 6 | -3.58479700 | 2.13569000  | 1.75301300  | 6     | -0.11666700 | 1.85356400  | -1.43964000 | 6  | -4.01749300 | 1.60338700  | 0.71035400  |
| 1 | -4.41464300 | 2.34507900  | 2.43098000  | 6     | 0.21629700  | 3.53461000  | 0.91315700  | 1  | -4.73066000 | 2.39390200  | 0.95037400  |
| 6 | -2.88204000 | 3.17078500  | 1.17660800  | 1     | 1.46804300  | 1.80549100  | 0.77145200  | 6  | -4.42503000 | 0.28548600  | 0.61291700  |
| 1 | -3.14453900 | 4.21158200  | 1.38003800  | 1     | 0.13498900  | 1.59216300  | 1.91625700  | 1  | -5.47158100 | 0.01185900  | 0.77339000  |
| 6 | 2.40378100  | -1.54470200 | -0.85250200 | 6     | -0.39049900 | 3.34630800  | -1.51704200 | 46 | 0.69159600  | -0.79984700 | -0.29183500 |
| 1 | 2.62793200  | -1.49495000 | -1.94388700 | 1     | 0.94408200  | 1.67577800  | -1.69871700 | 1  | 1.12265400  | -2.26615000 | -0.46236900 |
| 8 | 1.63045300  | -2.47791200 | -0.41756500 | 1     | -0.71946400 | 1.28212700  | -2.15995900 | 6  | 3.81563800  | -0.56586200 | 0.40266700  |
| 1 | 1.64491000  | 0.88675100  | -1.69661900 | 6     | 0.44395500  | 4.09138400  | -0.48510400 | 6  | 5.00474300  | 0.36400900  | 0.23922900  |
| 6 | 3.41672000  | -0.89901600 | 0.01246000  | 1     | 0.92730200  | 3.97987400  | 1.62675300  | 1  | 4.73498400  | 1.39639300  | 0.50000900  |
| 6 | 3.47798900  | -1.18650700 | 1.38550800  | 1     | -0.78025200 | 3.81985800  | 1.28376900  | 1  | 5.83530500  | 0.05381700  | 0.88775800  |
| 6 | 4.34064700  | 0.00619300  | -0.53059800 | 1     | -0.16242800 | 3.70069500  | -2.53412200 | 1  | 5.37936000  | 0.35892500  | -0.79523200 |
| 6 | 4.43013600  | -0.57282500 | 2.19115400  | 1     | -1.46493200 | 3.54239600  | -1.36718700 | 6  | 4.14366200  | -1.98544500 | -0.01736300 |

|       |             |             |             |    |             |             |             |       |             |             |             |
|-------|-------------|-------------|-------------|----|-------------|-------------|-------------|-------|-------------|-------------|-------------|
| 1     | 4.93042000  | -2.40866300 | 0.62184200  | 1  | 0.66830000  | 3.67830600  | 1.39974200  | 6     | -4.71186400 | 0.46024400  | 0.03834700  |
| 1     | 3.25372200  | -2.62589900 | 0.05406800  | 1  | -0.94457000 | 5.01439100  | 0.04233800  | 1     | -5.72434700 | 0.10075000  | 0.27584700  |
| 1     | 4.50988800  | -2.02215300 | -1.05469500 | 1  | -2.05180300 | 3.64343300  | -0.02471600 | 1     | -4.44927800 | 1.24789500  | 0.76009100  |
| 6     | 3.24914600  | -0.51738800 | 1.80512800  | 7  | 0.21750300  | 1.21164600  | -0.05068900 | 1     | -4.73462600 | 0.91513500  | -0.96215100 |
| 1     | 3.00295300  | 0.51167300  | 2.10131300  | 7  | 1.35195000  | -1.32581800 | -0.02157100 | 6     | -3.63843600 | -1.26509700 | 1.49251400  |
| 1     | 2.33328100  | -1.12570600 | 1.86803900  | 6  | 1.84727500  | -2.56115400 | 0.00288000  | 1     | -2.89439200 | -2.07517500 | 1.53954100  |
| 1     | 3.97844600  | -0.91206600 | 2.52498000  | 6  | 3.24074200  | -2.81773300 | 0.06422300  | 1     | -3.34335500 | -0.49838400 | 2.22540800  |
| 8     | 2.74832300  | -0.04834300 | -0.46397000 | 1  | 3.57484700  | -3.85494700 | 0.08110800  | 1     | -4.61211700 | -1.67673600 | 1.80177700  |
| 1     | 3.02681200  | -0.17935700 | -1.38043300 | 6  | 4.10710500  | -1.75953100 | 0.09564000  | 8     | -2.45843800 | -0.07013200 | -0.24062800 |
|       |             |             |             | 1  | 5.18600000  | -1.92570800 | 0.13990200  |       |             |             |             |
|       |             |             |             | 6  | 3.61364000  | -0.42735300 | 0.07016600  |       |             |             |             |
|       |             |             |             | 6  | 2.20009300  | -0.24434900 | 0.01326000  |       |             |             |             |
| B-IM6 |             |             |             | 6  | 1.65541700  | 1.07137100  | -0.00791200 | B-IM7 |             |             |             |
| 8     | 1.01858300  | -3.58269300 | -0.03234100 | 6  | 2.53066500  | 2.14936200  | 0.01963800  | 6     | -4.74820800 | -3.39162900 | 1.55408400  |
| 1     | 0.09634800  | -3.20441700 | -0.08084200 | 1  | 2.13443700  | 3.16307300  | 0.00282900  | 6     | -3.60098300 | -3.03498200 | 2.26759700  |
| 6     | -0.32267800 | 1.86650700  | -1.27290600 | 6  | 3.92530800  | 1.97030600  | 0.07023000  | 6     | -2.43631400 | -2.67976200 | 1.59730400  |
| 6     | -0.38976000 | 1.78854100  | 1.18010000  | 1  | 4.57727200  | 2.84554700  | 0.09006100  | 6     | -2.37874600 | -2.67996100 | 0.19043900  |
| 6     | -0.30637500 | 3.38643800  | -1.25028700 | 6  | 4.46055100  | 0.70153600  | 0.09734800  | 6     | -3.54327900 | -3.04080500 | -0.51002700 |
| 1     | -1.36640900 | 1.51594900  | -1.34588600 | 1  | 5.54159400  | 0.54840300  | 0.13926600  | 6     | -4.71292100 | -3.38957700 | 0.16064500  |
| 1     | 0.22180100  | 1.45874700  | -2.13685200 | 1  | -0.65496900 | -0.89276200 | -0.12163000 | 1     | -5.66371000 | -3.66550700 | 2.08327900  |
| 6     | -0.35993700 | 3.30576000  | 1.25446900  | 46 | -1.24032800 | -2.35606900 | -0.15971000 | 1     | -3.61904700 | -3.02767600 | 3.36037800  |
| 1     | -1.43787100 | 1.44228400  | 1.16692200  | 1  | -3.68014400 | -0.67028000 | 0.08555700  | 1     | -1.55393200 | -2.37846700 | 2.16880800  |
| 1     | 0.10118400  | 1.31946000  | 2.04536700  | 6  | -4.05601800 | -1.74906600 | -0.92788900 | 1     | -3.52105700 | -3.04796100 | -1.60426900 |
| 6     | -0.98141900 | 3.91502400  | 0.00655900  | 1  | -3.31033500 | -2.55828300 | -0.91556400 | 1     | -5.60266800 | -3.66581800 | -0.41052700 |
| 1     | -0.82711800 | 3.74708500  | -2.15076900 | 1  | -5.04266700 | -2.19074300 | -0.71795300 | 6     | 0.15507300  | -2.35368600 | -0.02309600 |
| 1     | 0.72090100  | 3.77943200  | -1.33369600 | 1  | -4.07592100 | -1.33051600 | -1.94443000 | 6     | 1.29960100  | -2.37341900 | -0.94693600 |
| 1     | -0.91129300 | 3.61681000  | 2.15528500  |    |             |             |             | 8     | 1.16933300  | -2.41078100 | -2.16866300 |

|   |            |             |             |       |             |             |             |   |             |             |             |
|---|------------|-------------|-------------|-------|-------------|-------------|-------------|---|-------------|-------------|-------------|
| 6 | 2.68728000 | -2.27974100 | -0.36811800 | 1     | 4.18500900  | 0.68502800  | -0.31368400 | 6 | -2.48574500 | -4.80369400 | 1.09310100  |
| 6 | 3.75615700 | -2.17002600 | -1.27031300 | 7     | 1.03673600  | 1.52001600  | 0.30221000  | 6 | -2.00800000 | -3.74477800 | 0.32215300  |
| 6 | 2.97126800 | -2.28663200 | 1.00563400  | 7     | -1.56049500 | 1.48957900  | -0.57720600 | 6 | -0.63676200 | -3.62266800 | 0.06687000  |
| 6 | 5.06693200 | -2.06317900 | -0.81720400 | 8     | -3.21637300 | 0.29735600  | -1.59110300 | 6 | 0.24236600  | -4.57704000 | 0.59556800  |
| 1 | 3.51677900 | -2.17441900 | -2.33630100 | 6     | -2.77042300 | 1.44770900  | -1.11053600 | 6 | -0.23916000 | -5.63524400 | 1.36330400  |
| 6 | 4.28437400 | -2.18021200 | 1.46255900  | 6     | -3.62064500 | 2.58198200  | -1.17121000 | 1 | -1.98412600 | -6.57901200 | 2.21951400  |
| 1 | 2.16250000 | -2.37300000 | 1.73440800  | 1     | -4.60037700 | 2.48130400  | -1.63808800 | 1 | -3.55769400 | -4.88689400 | 1.28729000  |
| 6 | 5.33569900 | -2.06608700 | 0.55319300  | 6     | -3.18952000 | 3.74853900  | -0.59896000 | 1 | -2.69654200 | -2.99974000 | -0.09118600 |
| 1 | 5.88759400 | -1.97863300 | -1.53403800 | 1     | -3.83243300 | 4.63228400  | -0.59295700 | 1 | 1.31462400  | -4.49127700 | 0.39447300  |
| 1 | 4.48825400 | -2.19054800 | 2.53626400  | 6     | -1.90529400 | 3.82503200  | 0.00477900  | 1 | 0.45800200  | -6.37363800 | 1.76678800  |
| 1 | 6.36456000 | -1.98445600 | 0.91225300  | 6     | -1.09064100 | 2.65719600  | -0.04994800 | 6 | 1.04330000  | -1.73441200 | -0.23656300 |
| 1 | 0.31404600 | -2.66989500 | 1.01300600  | 6     | 0.23119000  | 2.68190200  | 0.49026200  | 6 | 2.08467500  | -1.27049600 | -1.15801300 |
| 6 | 1.98377200 | 1.17153900  | 1.37772000  | 6     | 0.64213500  | 3.82321100  | 1.16363700  | 8 | 1.93102500  | -1.30078900 | -2.37699500 |
| 6 | 1.67815500 | 1.46441900  | -1.03921100 | 1     | 1.63514000  | 3.85433400  | 1.61157500  | 6 | 3.33285400  | -0.65755700 | -0.58802900 |
| 6 | 3.35753600 | 1.83143400  | 1.31321800  | 6     | -0.18534700 | 4.95891100  | 1.26609100  | 6 | 4.17246600  | 0.03717000  | -1.47282500 |
| 1 | 2.12878500 | 0.08059300  | 1.30817000  | 1     | 0.18106800  | 5.83769700  | 1.80044300  | 6 | 3.70907300  | -0.74992200 | 0.76064400  |
| 1 | 1.48376100 | 1.35856000  | 2.33925000  | 6     | -1.42739400 | 4.97656700  | 0.67068400  | 6 | 5.34550300  | 0.63306000  | -1.02336500 |
| 6 | 2.96471700 | 2.26557500  | -1.11065900 | 1     | -2.06153800 | 5.86503300  | 0.71735000  | 1 | 3.87199000  | 0.08627900  | -2.52221500 |
| 1 | 1.89488800 | 0.40377100  | -1.26140800 | 6     | -1.16650100 | -2.30948100 | -0.55517500 | 6 | 4.88833500  | -0.15791300 | 1.21182400  |
| 1 | 0.93667100 | 1.79115700  | -1.78200000 | 1     | -1.23270200 | -2.44481400 | -1.64454900 | 1 | 3.09084600  | -1.30339600 | 1.47083600  |
| 6 | 3.95399800 | 1.74097400  | -0.08203200 | 1     | -2.52013000 | -0.37656100 | -1.40903800 | 6 | 5.70679700  | 0.53758500  | 0.32267900  |
| 1 | 4.00885000 | 1.33473100  | 2.04968000  | 46    | -0.45304900 | -0.35794700 | -0.17569800 | 1 | 5.98761700  | 1.17202100  | -1.72408900 |
| 1 | 3.31330900 | 2.88799300  | 1.62490800  |       |             |             |             | 1 | 5.17304800  | -0.24704200 | 2.26288000  |
| 1 | 3.37477500 | 2.19779900  | -2.12967300 |       |             |             |             | 1 | 6.63050600  | 1.00091600  | 0.67733800  |
| 1 | 2.75373200 | 3.33602600  | -0.93302600 | B-IM8 |             |             |             | 1 | 1.31860800  | -1.94137900 | 0.80390100  |
| 1 | 4.91073900 | 2.28237200  | -0.13153200 | 6     | -1.60597400 | -5.75089800 | 1.61553800  | 6 | 0.95804200  | 1.52566100  | 1.54112600  |



|   |             |             |             |    |             |             |             |   |             |             |             |
|---|-------------|-------------|-------------|----|-------------|-------------|-------------|---|-------------|-------------|-------------|
| 6 | 0.92892700  | 2.16460500  | -0.84543400 | 1  | -0.19904600 | 4.21445500  | 1.42686700  | 6 | -4.22684300 | -0.50392400 | 0.63714100  |
| 6 | 1.90471300  | 2.67291600  | 1.86244600  | 6  | -2.30880400 | 4.50052600  | 1.13587000  | 6 | -5.33746200 | -0.57578400 | 1.49450300  |
| 1 | 1.56919400  | 0.62732400  | 1.36477800  | 1  | -2.29216600 | 5.49611000  | 1.58235200  | 6 | -4.31539600 | 0.25417400  | -0.54088000 |
| 1 | 0.28148600  | 1.29610300  | 2.37599000  | 6  | -3.48997100 | 3.96794400  | 0.64825000  | 6 | -6.51715600 | 0.08289400  | 1.17482800  |
| 6 | 1.78485000  | 3.37772000  | -0.53881900 | 1  | -4.42105300 | 4.53835600  | 0.70477800  | 1 | -5.24377000 | -1.16208400 | 2.41109800  |
| 1 | 1.58668700  | 1.33369900  | -1.14738300 | 6  | -0.09526900 | -2.50465300 | -0.77934100 | 6 | -5.49626700 | 0.92634200  | -0.84894500 |
| 1 | 0.23222200  | 2.33841800  | -1.67692200 | 1  | 0.10820200  | -2.79716800 | -1.82634800 | 1 | -3.45757900 | 0.38276000  | -1.20502700 |
| 6 | 2.70349900  | 3.09255900  | 0.63867000  | 1  | -1.05545600 | -1.83113900 | -1.02781200 | 6 | -6.59767400 | 0.83659500  | 0.00048700  |
| 1 | 2.57794300  | 2.32632600  | 2.66237100  | 46 | -0.49653300 | -0.31557600 | -0.32286500 | 1 | -7.37910600 | 0.01596400  | 1.84259600  |
| 1 | 1.36825900  | 3.53233300  | 2.29188700  |    |             |             |             | 1 | -5.54667300 | 1.53235100  | -1.75580800 |
| 1 | 2.36752200  | 3.61948700  | -1.44080300 |    |             |             |             | 1 | -7.52316100 | 1.36185600  | -0.24803700 |
| 1 | 1.15255400  | 4.25997200  | -0.34530500 |    |             |             |             | 1 | -2.30219900 | -1.85211100 | -0.92841600 |
| 1 | 3.33794700  | 3.96169800  | 0.86748600  |    |             |             |             | 6 | 2.43286100  | -0.51398800 | 1.75799200  |
| 1 | 3.39339700  | 2.27519500  | 0.36061400  |    |             |             |             | 6 | 2.77268300  | -0.41577100 | -0.67105900 |
| 7 | 0.11391000  | 1.68410700  | 0.31837200  |    |             |             |             | 6 | 3.89792100  | -0.87556600 | 1.97708000  |
| 7 | -2.28775900 | 0.66914700  | -0.49178700 |    |             |             |             | 1 | 1.86316000  | -1.45612900 | 1.70266600  |
| 8 | -3.34102400 | -1.14852500 | -1.37198400 |    |             |             |             | 1 | 2.01889500  | 0.06124200  | 2.59791900  |
| 6 | -3.40710200 | 0.01568500  | -0.96385300 |    |             |             |             | 6 | 4.26338100  | -0.61722700 | -0.48159700 |
| 6 | -4.64495400 | 0.78830000  | -0.93428500 |    |             |             |             | 1 | 2.29471300  | -1.39880300 | -0.82163000 |
| 1 | -5.53493100 | 0.29076800  | -1.32385100 |    |             |             |             | 1 | 2.53669900  | 0.19783100  | -1.55167600 |
| 6 | -4.69280300 | 2.05038400  | -0.43080400 |    |             |             |             | 6 | 4.51794800  | -1.49367700 | 0.73401900  |
| 1 | -5.63697700 | 2.60324800  | -0.40447400 |    |             |             |             | 1 | 3.94003300  | -1.57833000 | 2.82377100  |
| 6 | -3.51578800 | 2.68312100  | 0.08092900  |    |             |             |             | 1 | 4.48711700  | -0.00476600 | 2.30084600  |
| 6 | -2.31017700 | 1.92626200  | 0.01201100  |    |             |             |             | 1 | 4.67246200  | -1.07728200 | -1.39374600 |
| 6 | -1.10029900 | 2.49110700  | 0.49421500  |    |             |             |             | 1 | 4.77121100  | 0.35705400  | -0.37777500 |
| 6 | -1.11546200 | 3.76403800  | 1.05076800  |    |             |             |             | 1 | 5.59353800  | -1.67006200 | 0.88362500  |

B-IM8<sup>iso</sup>

|       |             |             |             |   |             |            |             |   |             |             |             |
|-------|-------------|-------------|-------------|---|-------------|------------|-------------|---|-------------|-------------|-------------|
| 1     | 4.06526900  | -2.48586600 | 0.55457100  | 6 | 0.72001200  | 2.52722100 | 0.50252200  | 1 | -0.12714300 | 2.54802100  | 1.21242700  |
| 7     | 2.10493100  | 0.22220800  | 0.50605300  | 6 | 0.33834800  | 1.75912400 | -0.74919100 | 6 | 0.65987600  | -2.20092000 | 1.82219000  |
| 7     | 0.22498400  | 1.86181400  | -0.60122700 | 6 | -0.87059600 | 2.21792900 | -1.45997300 | 6 | -1.46496100 | -2.87638400 | 0.83464900  |
| 8     | -1.80210100 | 1.93315200  | -1.63159600 | 6 | -1.83238400 | 3.08132500 | -0.89406600 | 6 | 0.66391200  | -3.44093100 | 2.69368700  |
| 6     | -0.78248000 | 2.52924700  | -1.26026200 | 6 | -1.11528700 | 1.75444100 | -2.77168100 | 1 | 0.18773000  | -1.35999400 | 2.35849000  |
| 6     | -0.56420600 | 3.95708700  | -1.46667600 | 6 | -2.99228600 | 3.43204400 | -1.58803000 | 1 | 1.66912300  | -1.85728600 | 1.56306000  |
| 1     | -1.34652500 | 4.49895200  | -2.00157800 | 1 | -1.66278100 | 3.51169400 | 0.09811100  | 6 | -1.57940400 | -4.05134800 | 1.80457400  |
| 6     | 0.54199200  | 4.58857400  | -0.98782700 | 6 | -2.26238600 | 2.11448800 | -3.46718900 | 1 | -2.00452000 | -2.02262200 | 1.28071500  |
| 1     | 0.67166300  | 5.66617800  | -1.12987200 | 1 | -0.37820300 | 1.09054900 | -3.23360300 | 1 | -1.95090400 | -3.10189400 | -0.12717900 |
| 6     | 1.55716100  | 3.86538600  | -0.28505900 | 6 | -3.21685000 | 2.95006400 | -2.87558900 | 6 | -0.75932000 | -3.82401600 | 3.06368300  |
| 6     | 1.34520800  | 2.46390300  | -0.14175600 | 1 | -3.72170000 | 4.09717100 | -1.11824800 | 1 | 1.27207100  | -3.24698200 | 3.58966600  |
| 6     | 2.32600200  | 1.66965000  | 0.51715400  | 1 | -2.41836200 | 1.74116000 | -4.48250800 | 1 | 1.15830400  | -4.27188900 | 2.15947300  |
| 6     | 3.44244400  | 2.28613600  | 1.06471100  | 1 | -4.12094000 | 3.23062200 | -3.42101300 | 1 | -2.64492700 | -4.19053600 | 2.04546700  |
| 1     | 4.19935500  | 1.69775000  | 1.58024000  | 6 | 1.86325800  | 1.94126900 | 1.31852600  | 1 | -1.25903200 | -4.99217200 | 1.33222700  |
| 6     | 3.62749000  | 3.67619800  | 0.95944100  | 6 | 3.16950100  | 2.65298700 | 1.36874800  | 1 | -0.78439600 | -4.71643600 | 3.70703800  |
| 1     | 4.51145900  | 4.13322000  | 1.40750800  | 6 | 4.04866700  | 2.35092600 | 2.41725900  | 1 | -1.20810800 | -3.00701200 | 3.65734300  |
| 6     | 2.70524400  | 4.45027900  | 0.27711900  | 6 | 3.55795800  | 3.59385100 | 0.40595900  | 7 | -0.10396500 | -2.38699300 | 0.55138500  |
| 1     | 2.85239900  | 5.52911400  | 0.17593500  | 6 | 5.27933200  | 2.99078800 | 2.51611200  | 7 | 1.80213500  | -1.00295300 | -0.85415000 |
| 6     | -0.65035700 | -2.02743600 | 0.48875600  | 1 | 3.73646900  | 1.60265200 | 3.14913100  | 8 | 3.07587100  | 0.90337500  | -0.95389300 |
| 1     | -0.65266000 | -2.23493000 | 1.56664300  | 6 | 4.79465800  | 4.22515900 | 0.49625700  | 6 | 2.91605000  | -0.28561500 | -1.25181600 |
| 1     | -1.72864300 | -0.30857400 | -0.45658400 | 1 | 2.90641000  | 3.80276900 | -0.44509500 | 6 | 3.89053700  | -0.99875500 | -2.07237700 |
| 46    | -0.04604400 | -0.09266500 | 0.02949000  | 6 | 5.65436300  | 3.93158200 | 1.55539800  | 1 | 4.74222700  | -0.40752000 | -2.41343800 |
|       |             |             |             | 1 | 5.95359900  | 2.75532800 | 3.34314100  | 6 | 3.73694500  | -2.30390300 | -2.40840900 |
|       |             |             |             | 1 | 5.09483300  | 4.94579800 | -0.26795100 | 1 | 4.46458100  | -2.80951500 | -3.05096700 |
| B-IM9 |             |             |             | 1 | 6.62233100  | 4.43354500 | 1.62881700  | 6 | 2.62585100  | -3.05001300 | -1.90812400 |
| 1     | -2.01477900 | 1.32514400  | 0.68033900  | 8 | 1.66070500  | 0.95779000 | 2.01356000  | 6 | 1.70709200  | -2.35188200 | -1.07434300 |

|    |             |             |             |        |             |            |             |  |   |             |             |             |
|----|-------------|-------------|-------------|--------|-------------|------------|-------------|--|---|-------------|-------------|-------------|
| 6  | 0.65972300  | -3.09154400 | -0.45152700 |        |             |            |             |  | 1 | 2.98669600  | 5.62298400  | 0.80269300  |
| 6  | 0.45329000  | -4.41828000 | -0.80155700 | B-IM10 |             |            |             |  | 1 | 5.07848300  | 4.50231400  | 1.55103800  |
| 1  | -0.37197400 | -4.97633300 | -0.36066600 | 1      | -1.79722600 | 0.38441000 | 0.88195700  |  | 8 | 0.47946600  | 0.56342700  | 1.88346200  |
| 6  | 1.30423000  | -5.07210100 | -1.70921300 | 6      | -0.77995000 | 2.28666800 | 0.84077400  |  | 1 | -1.33239000 | 2.76962200  | 1.66806500  |
| 1  | 1.11248600  | -6.11353000 | -1.97387200 | 6      | -1.66597800 | 1.23339200 | 0.19213900  |  | 6 | 1.08719700  | -2.69012200 | 1.18698100  |
| 6  | 2.39897600  | -4.40388300 | -2.22205700 | 6      | -2.99842600 | 1.74258200 | -0.27299100 |  | 6 | 1.29911200  | -3.31681200 | -1.18803500 |
| 1  | 3.09902000  | -4.90983700 | -2.89239000 | 6      | -4.06347500 | 1.85720900 | 0.62960000  |  | 6 | 1.68768100  | -4.02121100 | 1.61359500  |
| 46 | 0.00271900  | -0.21771900 | -0.18336000 | 6      | -3.19626900 | 2.12445900 | -1.60565000 |  | 1 | -0.00898200 | -2.79186500 | 1.15355700  |
| 1  | 1.19103000  | 1.67374300  | -1.43115900 | 6      | -5.29943600 | 2.34067700 | 0.20983700  |  | 1 | 1.32200800  | -1.87440700 | 1.88313000  |
| 6  | -3.11298200 | 0.05891000  | -0.31725100 | 1      | -3.92448500 | 1.54132000 | 1.66840900  |  | 6 | 1.95845700  | -4.62896100 | -0.80359800 |
| 1  | -2.97747900 | 0.53975700  | -1.30101100 | 6      | -4.43702800 | 2.60104000 | -2.02804300 |  | 1 | 0.20930800  | -3.46233500 | -1.26270400 |
| 8  | -2.00867600 | 0.36269800  | 0.54624600  | 1      | -2.36120800 | 2.04668400 | -2.30923600 |  | 1 | 1.65793900  | -2.93416600 | -2.15373400 |
| 6  | -4.42732500 | 0.44371200  | 0.29278400  | 6      | -5.49139700 | 2.71021600 | -1.12200500 |  | 6 | 1.46887600  | -5.09456600 | 0.55882000  |
| 6  | -4.64660200 | 0.31023000  | 1.66954100  | 1      | -6.12359700 | 2.41225700 | 0.92413000  |  | 1 | 1.20622700  | -4.30684900 | 2.56124400  |
| 6  | -5.46320200 | 0.92640000  | -0.51519900 | 1      | -4.57976100 | 2.89099200 | -3.07193000 |  | 1 | 2.75742700  | -3.92300400 | 1.85511600  |
| 6  | -5.87866300 | 0.65010200  | 2.22468900  | 1      | -6.46411000 | 3.08140100 | -1.45374100 |  | 1 | 1.71577700  | -5.36934100 | -1.58102000 |
| 1  | -3.83875500 | -0.05674400 | 2.30827100  | 6      | 0.48163900  | 1.70283500 | 1.43844900  |  | 1 | 3.05657000  | -4.53564000 | -0.82023100 |
| 6  | -6.69841000 | 1.25676700  | 0.03882900  | 6      | 1.72540600  | 2.52173500 | 1.47354000  |  | 1 | 1.95526300  | -6.03698000 | 0.85196200  |
| 1  | -5.29169500 | 1.04902500  | -1.58877600 | 6      | 2.91011600  | 1.90386600 | 1.90473600  |  | 1 | 0.38911200  | -5.31515000 | 0.49073400  |
| 6  | -6.90871100 | 1.12097000  | 1.41071300  | 6      | 1.76794700  | 3.86710500 | 1.07527200  |  | 7 | 1.47875200  | -2.22548200 | -0.18191600 |
| 1  | -6.03627800 | 0.54515000  | 3.30064400  | 6      | 4.10785200  | 2.60794100 | 1.92767400  |  | 7 | 1.62200000  | 0.36587900  | -1.10922600 |
| 1  | -7.49846900 | 1.63229700  | -0.60326600 | 1      | 2.86644700  | 0.85344700 | 2.20420900  |  | 8 | 0.45144700  | 2.12259100  | -1.96231600 |
| 1  | -7.87431600 | 1.38706300  | 1.84657400  | 6      | 2.96567200  | 4.57551200 | 1.11156200  |  | 6 | 1.54483500  | 1.62641600  | -1.66477000 |
| 1  | -3.05030100 | -1.02794100 | -0.48361300 | 1      | 0.86188100  | 4.36888800 | 0.73044900  |  | 6 | 2.81412700  | 2.32229600  | -1.84139900 |
| 1  | 0.91012200  | 3.58626900  | 0.24927500  | 6      | 4.13763200  | 3.94664500 | 1.53214100  |  | 1 | 2.75563900  | 3.32777600  | -2.26272600 |
|    |             |             |             | 1      | 5.02592200  | 2.11028000 | 2.24987000  |  | 6 | 3.99732500  | 1.76184200  | -1.48020300 |

|    |             |             |             |        |             |             |             |   |             |             |             |
|----|-------------|-------------|-------------|--------|-------------|-------------|-------------|---|-------------|-------------|-------------|
| 1  | 4.93613000  | 2.31153500  | -1.60105500 | 1      | -2.93621000 | -2.59524300 | -1.60993000 | 1 | -4.09869400 | 2.71661600  | 0.10072500  |
| 6  | 4.04362300  | 0.44180800  | -0.93124400 | 1      | -0.55813800 | 3.07602800  | 0.11146800  | 6 | -4.79751700 | 1.61891200  | -3.04126500 |
| 6  | 2.79786400  | -0.23282300 | -0.77703300 |        |             |             |             | 1 | -3.41661900 | 0.56683400  | -4.32571600 |
| 6  | 2.78026100  | -1.55272500 | -0.25888000 |        |             |             |             | 1 | -5.92758900 | 2.69508000  | -1.54590500 |
| 6  | 3.97316300  | -2.15233300 | 0.12791300  | B-IM11 |             |             |             | 1 | -5.61050000 | 1.61361200  | -3.77100900 |
| 1  | 3.97643700  | -3.16246500 | 0.53148900  | 1      | -1.87661600 | -0.30404200 | 0.87032100  | 8 | -0.41729600 | 1.17288300  | -0.64961300 |
| 6  | 5.19577500  | -1.47293100 | 0.00539200  | 6      | -1.74712400 | 1.88201000  | 1.15048000  | 1 | -2.72203400 | 2.21940900  | 1.50854200  |
| 1  | 6.11629800  | -1.96567200 | 0.32286100  | 6      | -0.61164900 | 1.85300700  | 2.11938600  | 6 | 2.11357900  | 0.52712900  | -2.18620300 |
| 6  | 5.22769300  | -0.19596200 | -0.52760000 | 6      | 0.32592800  | 3.04449300  | 2.10209400  | 6 | 2.58627700  | 1.22136600  | 0.13842800  |
| 1  | 6.17589500  | 0.33766300  | -0.63769000 | 6      | 0.33267700  | 3.98001900  | 1.06158900  | 6 | 3.15338700  | 1.50901000  | -2.70194800 |
| 46 | -0.00842400 | -0.74468800 | -0.66266100 | 6      | 1.26265900  | 3.19794200  | 3.13452300  | 1 | 1.13009100  | 1.02203300  | -2.18734600 |
| 1  | -1.12422100 | 0.91443600  | -0.74293300 | 6      | 1.24492300  | 5.03620200  | 1.05372900  | 1 | 2.04197900  | -0.37157700 | -2.81457200 |
| 6  | -2.64789200 | -1.79190500 | -0.89309500 | 1      | -0.38721200 | 3.87579900  | 0.24576500  | 6 | 3.64591100  | 2.19435600  | -0.34291300 |
| 1  | -2.55271100 | -0.89308700 | -1.55913400 | 6      | 2.17500400  | 4.25062700  | 3.13010500  | 1 | 1.62984000  | 1.75900700  | 0.21013000  |
| 8  | -1.45844800 | -2.07977800 | -0.27317700 | 1      | 1.27268900  | 2.47509800  | 3.95667700  | 1 | 2.81612600  | 0.80577600  | 1.12989500  |
| 6  | -3.81024400 | -1.54355200 | 0.03996800  | 6      | 2.17031700  | 5.17752500  | 2.08637800  | 6 | 3.32446100  | 2.68027800  | -1.74703200 |
| 6  | -3.63836700 | -1.57752400 | 1.42574500  | 1      | 1.22922100  | 5.75659200  | 0.23142500  | 1 | 2.81285400  | 1.85785400  | -3.68884200 |
| 6  | -5.08290600 | -1.27312800 | -0.47745800 | 1      | 2.89125100  | 4.35141700  | 3.94954500  | 1 | 4.11712200  | 1.01007500  | -2.88902200 |
| 6  | -4.71733100 | -1.33997800 | 2.27887000  | 1      | 2.88126300  | 6.00720400  | 2.08242800  | 1 | 3.65745900  | 3.03506400  | 0.36782100  |
| 1  | -2.64152500 | -1.79264400 | 1.82033700  | 6      | -1.57779800 | 1.57444800  | -0.17541900 | 1 | 4.65332700  | 1.75079300  | -0.29602200 |
| 6  | -6.15956000 | -1.03487600 | 0.37099700  | 6      | -2.70304400 | 1.62915500  | -1.15235800 | 1 | 4.09714100  | 3.37317200  | -2.11216200 |
| 1  | -5.22488400 | -1.23518100 | -1.56289600 | 6      | -2.53363400 | 1.04563300  | -2.41824300 | 1 | 2.38302000  | 3.25742800  | -1.71427500 |
| 6  | -5.98023300 | -1.06636500 | 1.75565500  | 6      | -3.94002800 | 2.22963300  | -0.86363500 | 7 | 2.32199700  | 0.06102400  | -0.77760000 |
| 1  | -4.57037300 | -1.37101400 | 3.36194500  | 6      | -3.56963900 | 1.03431100  | -3.34978900 | 7 | 1.48655400  | -2.36151500 | 0.21064000  |
| 1  | -7.14463900 | -0.81433800 | -0.04861900 | 1      | -1.56838800 | 0.59067300  | -2.65317500 | 8 | -0.26433700 | -3.65935200 | 0.93051600  |
| 1  | -6.82505700 | -0.88052200 | 2.42364300  | 6      | -4.97428000 | 2.22198800  | -1.79425600 | 6 | 0.93615900  | -3.54225100 | 0.69593600  |

|    |             |             |             |        |             |             |             |   |             |             |             |
|----|-------------|-------------|-------------|--------|-------------|-------------|-------------|---|-------------|-------------|-------------|
| 6  | 1.87704600  | -4.64139900 | 0.90487900  | 6      | -6.26359200 | -1.97980600 | 1.53493600  | 6 | 3.89309200  | 0.74179500  | 3.02074800  |
| 1  | 1.44255300  | -5.55678100 | 1.31066500  | 1      | -5.37029800 | -3.23299400 | 3.05203300  | 1 | 1.76375500  | 0.69634000  | 2.62704400  |
| 6  | 3.19423900  | -4.54399400 | 0.60018100  | 1      | -6.87838000 | -0.72283700 | -0.11297100 | 6 | 5.28656800  | 1.40348600  | 1.15744200  |
| 1  | 3.87174400  | -5.38913900 | 0.75566700  | 1      | -7.25480700 | -1.99837900 | 1.99451800  | 1 | 4.27612400  | 1.86054200  | -0.67751700 |
| 6  | 3.72371800  | -3.32977800 | 0.06265200  | 1      | -1.89725500 | -2.87694900 | -0.32540600 | 6 | 5.15711000  | 0.99389900  | 2.48581500  |
| 6  | 2.80952000  | -2.24838500 | -0.11104100 |        |             |             |             | 1 | 3.79329400  | 0.41833500  | 4.05935100  |
| 6  | 3.29489200  | -1.02714100 | -0.63718000 |        |             |             |             | 1 | 6.27624500  | 1.58599300  | 0.73382000  |
| 6  | 4.63559100  | -0.89781900 | -0.98125400 | B-IM12 |             |             |             | 1 | 6.04813800  | 0.86446000  | 3.10505600  |
| 1  | 5.01170300  | 0.03864900  | -1.38688400 | 1      | 2.46566500  | 1.10336100  | -1.84171800 | 8 | 0.53805400  | 1.26699800  | 0.62641000  |
| 6  | 5.52816800  | -1.96571700 | -0.81174200 | 6      | 1.78322100  | 1.82275400  | -1.36507300 | 1 | 2.31905600  | 2.78959700  | -1.38845900 |
| 1  | 6.57607400  | -1.84114000 | -1.08907900 | 6      | 0.49365100  | 1.90874000  | -2.15102500 | 6 | -2.11646100 | 0.42338200  | 2.20555200  |
| 6  | 5.07170500  | -3.16493000 | -0.29325300 | 6      | -0.41074000 | 3.07789300  | -1.86434300 | 6 | -2.79441900 | 1.21942700  | -0.02195800 |
| 1  | 5.75526900  | -4.00665300 | -0.15369000 | 6      | -0.18687600 | 3.98370300  | -0.82089400 | 6 | -3.17243200 | 1.30002000  | 2.86132500  |
| 46 | 0.44735700  | -0.65298800 | -0.11793600 | 6      | -1.55329900 | 3.26417000  | -2.65864800 | 1 | -1.16587500 | 0.97919600  | 2.18003100  |
| 1  | 0.01285800  | 0.95296300  | 1.92967600  | 6      | -1.07615300 | 5.03069000  | -0.57209300 | 1 | -1.93848700 | -0.50252100 | 2.77022100  |
| 1  | -0.98673200 | 1.72010900  | 3.14651700  | 1      | 0.68841000  | 3.87411700  | -0.17617000 | 6 | -3.88806600 | 2.07771300  | 0.58669500  |
| 6  | -2.35523600 | -1.88442000 | -0.23475500 | 6      | -2.44295700 | 4.30640600  | -2.41516000 | 1 | -1.88419800 | 1.83269800  | -0.12100800 |
| 1  | -2.37491200 | -1.39404100 | -1.22302500 | 1      | -1.74532300 | 2.56821600  | -3.48153600 | 1 | -3.05476600 | 0.85645200  | -1.02658500 |
| 8  | -1.46139700 | -1.16730300 | 0.64699300  | 6      | -2.20963300 | 5.19606900  | -1.36446300 | 6 | -3.50534300 | 2.50556900  | 1.99488200  |
| 6  | -3.72451600 | -1.93590000 | 0.35985700  | 1      | -0.87758600 | 5.72253300  | 0.25034300  | 1 | -2.77913000 | 1.62014000  | 3.83834900  |
| 6  | -3.94147800 | -2.65038100 | 1.54637600  | 1      | -3.32380300 | 4.42762700  | -3.05085100 | 1 | -4.08009900 | 0.72115300  | 3.09158800  |
| 6  | -4.78804400 | -1.24353300 | -0.22866300 | 1      | -2.90482000 | 6.01625900  | -1.17050800 | 1 | -4.02320800 | 2.95488100  | -0.06413700 |
| 6  | -5.20518600 | -2.67145500 | 2.12935000  | 6      | 1.65385300  | 1.40545500  | 0.07326700  | 1 | -4.85485000 | 1.54936100  | 0.58096500  |
| 1  | -3.10259400 | -3.18724300 | 1.99872000  | 6      | 2.87650200  | 1.30602600  | 0.88973800  | 1 | -4.30192100 | 3.10888200  | 2.45538700  |
| 6  | -6.05448900 | -1.26734900 | 0.35532000  | 6      | 2.76104400  | 0.89564200  | 2.22890900  | 1 | -2.61897200 | 3.16267200  | 1.93471600  |
| 1  | -4.61843200 | -0.68114500 | -1.15283800 | 6      | 4.15673800  | 1.55897300  | 0.36469100  | 7 | -2.39916900 | 0.03035300  | 0.79179900  |

|    |             |             |             |        |             |             |             |   |             |             |             |
|----|-------------|-------------|-------------|--------|-------------|-------------|-------------|---|-------------|-------------|-------------|
| 7  | -1.47272000 | -2.24628800 | -0.45938700 | 1      | 3.19575900  | -1.16910500 | -2.27618000 | 6 | -2.95833600 | -2.29392000 | 0.10039400  |
| 8  | 0.20611800  | -3.29339000 | -1.63867900 | 6      | 5.89740600  | -1.94646200 | 0.39478600  | 6 | -2.32922100 | -3.02231300 | 1.12270100  |
| 6  | -0.93046800 | -3.30918300 | -1.18718300 | 1      | 4.24002100  | -2.26936300 | 1.74037700  | 6 | -4.34462800 | -2.45077300 | -0.06064500 |
| 6  | -1.81349600 | -4.46254500 | -1.37411600 | 6      | 6.29177600  | -1.58478300 | -0.89350600 | 6 | -3.05868600 | -3.85554600 | 1.96726600  |
| 1  | -1.37095200 | -5.29666700 | -1.92166900 | 1      | 5.62048600  | -1.03466300 | -2.87114600 | 1 | -1.25122000 | -2.90541100 | 1.25563500  |
| 6  | -3.08487100 | -4.49840400 | -0.91143000 | 1      | 6.65063700  | -2.16949100 | 1.15564400  | 6 | -5.07513400 | -3.28122400 | 0.78371500  |
| 1  | -3.71914100 | -5.37623200 | -1.06913400 | 1      | 7.35285800  | -1.53012000 | -1.14971200 | 1 | -4.86297500 | -1.92557200 | -0.86595500 |
| 6  | -3.62792500 | -3.37638800 | -0.21134900 | 1      | 1.71922600  | -2.80078800 | 0.00177700  | 6 | -4.43707400 | -3.98652700 | 1.80554500  |
| 6  | -2.76859600 | -2.25191000 | -0.01710600 |        |             |             |             | 1 | -2.54697900 | -4.40568800 | 2.76109800  |
| 6  | -3.29462400 | -1.11564300 | 0.64805000  |        |             |             |             | 1 | -6.15309000 | -3.38598300 | 0.63808200  |
| 6  | -4.60616700 | -1.11735600 | 1.11232300  | B-IM13 |             |             |             | 1 | -5.01187200 | -4.63967500 | 2.46623600  |
| 1  | -5.00713700 | -0.24362500 | 1.62172900  | 1      | -2.04201800 | 0.69520100  | 0.20833300  | 8 | -0.83250900 | -1.54794900 | -0.64886900 |
| 6  | -5.43549500 | -2.23187900 | 0.93379400  | 6      | -2.70683100 | -0.44164900 | -1.56162600 | 1 | -3.79689300 | -0.35253300 | -1.58490800 |
| 1  | -6.45956500 | -2.21134000 | 1.30987900  | 6      | -1.93981100 | 0.46728300  | -2.47049700 | 6 | 1.81229700  | -2.69734400 | -0.03437000 |
| 6  | -4.94438300 | -3.34465200 | 0.27332600  | 6      | -2.19646800 | 1.93598600  | -2.22289700 | 6 | 1.95932600  | -1.25960400 | -2.03515500 |
| 1  | -5.57725600 | -4.22216700 | 0.11551100  | 6      | -3.42070800 | 2.51959600  | -2.57852800 | 6 | 2.52804500  | -3.82440300 | -0.76753800 |
| 46 | -0.49047000 | -0.53359600 | 0.00136500  | 6      | -1.23788300 | 2.73357000  | -1.58948400 | 1 | 0.72832700  | -2.84375300 | -0.15074200 |
| 1  | -0.07319400 | 0.96783400  | -2.00374800 | 6      | -3.67552200 | 3.86320400  | -2.31119900 | 1 | 2.04068600  | -2.69366700 | 1.04064700  |
| 1  | 0.73625400  | 1.90934300  | -3.22544100 | 1      | -4.18197400 | 1.91073700  | -3.07758800 | 6 | 2.77378700  | -2.31850600 | -2.75245400 |
| 6  | 2.09791900  | -1.76422200 | 0.12226300  | 6      | -1.49005600 | 4.07677200  | -1.31435300 | 1 | 0.89050600  | -1.41139300 | -2.25500100 |
| 1  | 2.00695000  | -1.52817800 | 1.21190200  | 1      | -0.28615500 | 2.29514500  | -1.27077100 | 1 | 2.22799900  | -0.23928800 | -2.34374900 |
| 8  | 1.38122600  | -0.88352500 | -0.66827000 | 6      | -2.70911900 | 4.64650800  | -1.67718900 | 6 | 2.37168900  | -3.70465500 | -2.27518900 |
| 6  | 3.56208200  | -1.71786000 | -0.23251700 | 1      | -4.63356900 | 4.30263500  | -2.60081700 | 1 | 2.09162300  | -4.76921500 | -0.40907800 |
| 6  | 3.96616700  | -1.37333500 | -1.52849000 | 1      | -0.72787700 | 4.66289900  | -0.79613300 | 1 | 3.59205600  | -3.88137100 | -0.49261700 |
| 6  | 4.54378100  | -2.00748500 | 0.72143600  | 1      | -2.91064100 | 5.69916900  | -1.46368700 | 1 | 2.59717700  | -2.20773800 | -3.83290400 |
| 6  | 5.31966700  | -1.30294400 | -1.85461100 | 6      | -2.13437800 | -1.39007900 | -0.75154700 | 1 | 3.85309100  | -2.14568300 | -2.60909900 |

|    |             |             |             |        |             |            |             |   |             |             |             |
|----|-------------|-------------|-------------|--------|-------------|------------|-------------|---|-------------|-------------|-------------|
| 1  | 2.95165800  | -4.48568600 | -2.78886600 | 1      | -3.45756300 | 0.59307300 | 3.40686400  | 1 | -1.03789200 | 6.53051000  | -2.32266600 |
| 1  | 1.31518600  | -3.87955400 | -2.54407400 | 1      | -3.78259900 | 0.39630100 | 1.67598400  | 6 | -2.61095200 | -0.50679400 | -0.00346200 |
| 7  | 2.07300000  | -1.31198300 | -0.54044700 | 6      | -2.28391800 | 2.69923200 | 2.05660600  | 6 | -3.82322500 | -1.32514400 | 0.21431900  |
| 7  | 1.95975500  | 1.16536300  | 0.63354600  | 1      | -2.69619400 | 3.02901400 | 3.02131800  | 6 | -3.71818900 | -2.50332300 | 0.97558000  |
| 8  | 0.69296700  | 3.04177800  | 0.98182200  | 1      | -1.43964900 | 3.34311300 | 1.78401600  | 6 | -5.07098800 | -0.97461000 | -0.32656800 |
| 6  | 1.79536700  | 2.49544600  | 0.99383900  | 1      | -3.07084500 | 2.81925600 | 1.29636700  | 6 | -4.83228800 | -3.30205300 | 1.19625000  |
| 6  | 3.00709100  | 3.20095500  | 1.40517100  | 6      | -0.70330600 | 1.05511300 | 3.12388700  | 1 | -2.74709800 | -2.76350500 | 1.40198200  |
| 1  | 2.85965200  | 4.22868400  | 1.74196100  | 1      | 0.12859400  | 1.73280800 | 2.90024800  | 6 | -6.18246300 | -1.78608200 | -0.11780600 |
| 6  | 4.23479900  | 2.62714400  | 1.36059100  | 1      | -1.05344500 | 1.26351200 | 4.14411500  | 1 | -5.17307900 | -0.07219500 | -0.93205800 |
| 1  | 5.12656300  | 3.17881100  | 1.67339400  | 1      | -0.33813000 | 0.01688600 | 3.09675500  | 6 | -6.06671000 | -2.94638900 | 0.64693400  |
| 6  | 4.38690400  | 1.28959600  | 0.88097700  |        |             |            |             | 1 | -4.74404600 | -4.20647100 | 1.80196200  |
| 6  | 3.19678100  | 0.60240500  | 0.49849200  |        |             |            |             | 1 | -7.14549200 | -1.50984200 | -0.55196600 |
| 6  | 3.30956800  | -0.69904400 | -0.04689100 | B-IM14 |             |            |             | 1 | -6.94276500 | -3.57602300 | 0.81860300  |
| 6  | 4.55492000  | -1.30848000 | -0.14354500 | 1      | -2.22911300 | 1.46021900 | 0.40935200  | 8 | -1.51082800 | -1.04047800 | 0.22399400  |
| 1  | 4.64701500  | -2.30880700 | -0.55980700 | 6      | -2.69290200 | 0.91411000 | -0.43824600 | 1 | -3.72695900 | 1.26284000  | -0.54808600 |
| 6  | 5.71642200  | -0.64671100 | 0.28041900  | 6      | -1.86384900 | 1.23223700 | -1.68890400 | 6 | 0.87562400  | -3.01299100 | -0.08269400 |
| 1  | 6.68165600  | -1.14941800 | 0.20197100  | 6      | -1.64336300 | 2.70529500 | -1.88044100 | 6 | 1.01177500  | -1.58640100 | -2.08062400 |
| 6  | 5.62873600  | 0.64299000  | 0.77355400  | 6      | -2.33098600 | 3.42555600 | -2.86318700 | 6 | 1.02042100  | -4.26644100 | -0.93768700 |
| 1  | 6.52699400  | 1.18080100  | 1.08833700  | 6      | -0.73678300 | 3.37979000 | -1.04928400 | 1 | -0.19790700 | -2.82729400 | 0.07478700  |
| 46 | 0.44802100  | -0.10902800 | 0.12778400  | 6      | -2.11755600 | 4.79563000 | -3.02116900 | 1 | 1.32768400  | -3.14100300 | 0.91101200  |
| 1  | -2.20286900 | 0.23182800  | -3.51931800 | 1      | -3.03783100 | 2.90567200 | -3.51847500 | 6 | 1.27826200  | -2.79862300 | -2.95263500 |
| 1  | -0.86210500 | 0.25936200  | -2.37039000 | 6      | -0.52061000 | 4.74581400 | -1.21329300 | 1 | -0.07436300 | -1.39052500 | -2.06582400 |
| 6  | -1.83390600 | 1.25146100  | 2.13732000  | 1      | -0.18897300 | 2.83844000 | -0.26829500 | 1 | 1.49843700  | -0.67664100 | -2.45976300 |
| 8  | -1.30642100 | 0.88843700  | 0.82238000  | 6      | -1.21018900 | 5.45860100 | -2.19622000 | 6 | 0.58469300  | -4.02248400 | -2.37451200 |
| 6  | -2.99792900 | 0.32360800  | 2.44562200  | 1      | -2.65968200 | 5.34516800 | -3.79502200 | 1 | 0.40592300  | -5.05478700 | -0.47622000 |
| 1  | -2.67755000 | -0.72584000 | 2.50378400  | 1      | 0.20230600  | 5.24746200 | -0.56505900 | 1 | 2.04897800  | -4.65584900 | -0.91063600 |

|    |             |             |             |        |             |             |             |   |             |             |             |
|----|-------------|-------------|-------------|--------|-------------|-------------|-------------|---|-------------|-------------|-------------|
| 1  | 0.91634700  | -2.58414000 | -3.96946900 | 6      | -1.27952000 | -0.10234900 | 3.29926900  | 1 | -0.91967300 | 4.47167100  | -1.48653800 |
| 1  | 2.36283100  | -2.96888200 | -3.05200600 | 1      | -0.78173100 | -1.00749300 | 2.91142900  | 1 | -2.36617400 | 3.84484200  | -0.73882800 |
| 1  | 0.76854300  | -4.91379200 | -2.99276500 | 1      | -1.34405300 | -0.20021700 | 4.39431900  | 1 | -1.14561100 | 5.08505200  | 0.98131800  |
| 1  | -0.50757600 | -3.85596100 | -2.39921400 | 1      | -2.30744100 | -0.08859000 | 2.90261500  | 1 | 0.36326800  | 4.27201600  | 0.58407300  |
| 7  | 1.42860800  | -1.75375300 | -0.65886400 | 6      | -1.24044300 | 2.40852900  | 3.35664600  | 7 | -0.96028500 | 1.27342600  | -0.16110300 |
| 7  | 2.33175300  | 0.61326400  | 0.43431500  | 1      | -1.31393500 | 2.43296900  | 4.45448800  | 7 | -1.14902100 | -1.42326200 | 0.00918200  |
| 8  | 1.84935000  | 2.82841100  | 0.86419000  | 1      | -0.70084100 | 3.30329600  | 3.01723100  | 8 | 0.04555500  | -3.35275100 | 0.33283400  |
| 6  | 2.67507100  | 1.93287500  | 0.74267900  | 1      | -2.25912400 | 2.45063600  | 2.94370400  | 6 | -1.03343800 | -2.78143400 | 0.30505700  |
| 6  | 4.10628700  | 2.17835500  | 0.93015700  | 6      | 0.89577000  | 1.12179200  | 3.46238400  | 6 | -2.30831200 | -3.45523600 | 0.57345500  |
| 1  | 4.36383200  | 3.18403700  | 1.26741800  | 1      | 1.44697200  | 2.03013100  | 3.18864300  | 1 | -2.24047700 | -4.53038500 | 0.75001300  |
| 6  | 5.05073100  | 1.24383100  | 0.66861500  | 1      | 0.86656400  | 1.04508800  | 4.56017000  | 6 | -3.49374300 | -2.79712600 | 0.61046400  |
| 1  | 6.11469700  | 1.46383400  | 0.80029200  | 1      | 1.45815700  | 0.25426600  | 3.08164900  | 1 | -4.42560700 | -3.33435600 | 0.81267900  |
| 6  | 4.67117100  | -0.04816600 | 0.18783000  |        |             |             |             | 6 | -3.55033900 | -1.38197500 | 0.39866100  |
| 6  | 3.27255200  | -0.31054100 | 0.06984300  |        |             |             |             | 6 | -2.31409700 | -0.73175500 | 0.12005800  |
| 6  | 2.86461100  | -1.56246800 | -0.45915100 | B-IM15 |             |             |             | 6 | -2.29374900 | 0.67640000  | -0.03966400 |
| 6  | 3.81600800  | -2.51632400 | -0.80481300 | 6      | -0.43123900 | 1.70647300  | 1.17130400  | 6 | -3.48113900 | 1.39560500  | 0.00570400  |
| 1  | 3.50483900  | -3.47461400 | -1.21538000 | 6      | -0.81982100 | 2.36807700  | -1.16355200 | 1 | -3.47881600 | 2.47687500  | -0.11785500 |
| 6  | 5.18568400  | -2.26846100 | -0.64211200 | 6      | -1.01749500 | 3.01882600  | 1.65180000  | 6 | -4.70577700 | 0.74452900  | 0.22167600  |
| 1  | 5.91093300  | -3.03856400 | -0.90974700 | 1      | 0.66313500  | 1.80820900  | 1.06296800  | 1 | -5.62825200 | 1.32703000  | 0.23932200  |
| 6  | 5.60157600  | -1.03976700 | -0.16010900 | 1      | -0.60618400 | 0.88034500  | 1.87362700  | 6 | -4.73187500 | -0.62421100 | 0.43348300  |
| 1  | 6.66602800  | -0.81908000 | -0.04287700 | 6      | -1.27027800 | 3.75687400  | -0.72645300 | 1 | -5.67809600 | -1.13739900 | 0.62509500  |
| 46 | 0.45022300  | -0.12832400 | 0.41994500  | 1      | 0.25730400  | 2.42134400  | -1.39483500 | 6 | 2.53306400  | -0.50761600 | -1.51435000 |
| 1  | -2.34461300 | 0.79160700  | -2.57869600 | 1      | -1.32585400 | 2.03933500  | -2.08195200 | 1 | 2.95358500  | -0.29531900 | -2.52666300 |
| 1  | -0.88148600 | 0.73762300  | -1.57998500 | 6      | -0.72968700 | 4.12325900  | 0.64714600  | 8 | 1.78479000  | -1.60328100 | -1.43634900 |
| 6  | -0.51289600 | 1.15411300  | 2.87091400  | 1      | -0.58829300 | 3.25662600  | 2.63629800  | 1 | 1.80766500  | 0.47746100  | -1.49932900 |
| 8  | -0.49949400 | 1.27772900  | 1.47405700  | 1      | -2.10299800 | 2.90913200  | 1.81434300  | 6 | 3.54950600  | -0.28339300 | -0.41972100 |



|        |             |             |             |    |             |             |             |        |             |             |             |
|--------|-------------|-------------|-------------|----|-------------|-------------|-------------|--------|-------------|-------------|-------------|
| 6      | 3.50936800  | -1.09252300 | 0.72043900  | 1  | -3.82858600 | -3.79345400 | 0.54894100  | 6      | 4.00179800  | 0.46897700  | 1.04520600  |
| 6      | 4.52185700  | 0.71482400  | -0.52891000 | 1  | -1.48324800 | -4.63751500 | 0.86481100  | 1      | 3.77564000  | 2.62615500  | 1.13037700  |
| 6      | 4.43655800  | -0.89677000 | 1.74180200  | 8  | 0.62144100  | -3.17916300 | 0.44773200  | 1      | 2.64705600  | 2.78619100  | -1.07188600 |
| 1      | 2.74697200  | -1.87585500 | 0.77599200  | 6  | -0.51390000 | 1.51726300  | 1.19634900  | 1      | 2.44583600  | 0.74085000  | -2.50297000 |
| 6      | 5.44691200  | 0.90982100  | 0.49535800  | 6  | -1.04149800 | 2.52946600  | -0.95418600 | 1      | 3.19404800  | -1.49316300 | -1.59939000 |
| 1      | 4.56017800  | 1.33985100  | -1.42766100 | 6  | -1.16843600 | 2.68066900  | 1.92443600  | 1      | 4.53311100  | 0.42123400  | 2.00028000  |
| 6      | 5.40424800  | 0.10358900  | 1.63321500  | 1  | 0.56883500  | 1.71325600  | 1.07884400  | 6      | 4.27687400  | -2.02352100 | 0.83586100  |
| 1      | 4.40804900  | -1.53413700 | 2.62885200  | 1  | -0.59742800 | 0.57899300  | 1.76086400  | 1      | 1.20684900  | -2.41634300 | 0.18886000  |
| 1      | 6.20826000  | 1.68819100  | 0.40323600  | 6  | -1.61040600 | 3.77168900  | -0.27431900 | 1      | 4.92954600  | -2.51437200 | 0.09717800  |
| 1      | 6.13175100  | 0.25184400  | 2.43485400  | 1  | 0.02390200  | 2.71298800  | -1.18782500 | 1      | 4.84720700  | -1.92162300 | 1.76795000  |
| 46     | 0.37402400  | -0.32484100 | -0.74955000 | 1  | -1.53676200 | 2.32696200  | -1.91512500 | 1      | 3.45573100  | -2.73065700 | 1.03388600  |
|        |             |             |             | 6  | -1.01487200 | 3.95708500  | 1.11255900  |        |             |             |             |
|        |             |             |             | 1  | -0.71667200 | 2.78739600  | 2.92263300  |        |             |             |             |
|        |             |             |             | 1  | -2.23891900 | 2.46206000  | 2.09004500  | B-IM17 |             |             |             |
| B-IM16 |             |             |             | 1  | -1.41483600 | 4.64940200  | -0.91007100 | 6      | -3.79455400 | 1.84406900  | -0.40305700 |
| 6      | -3.49384000 | 0.94272200  | -0.53854100 | 1  | -2.70774500 | 3.70133000  | -0.18901500 | 6      | -2.54145600 | 1.29371500  | -0.17248300 |
| 6      | -2.22110000 | 0.48837000  | -0.21240500 | 1  | -1.47464800 | 4.81648900  | 1.62389600  | 6      | -1.44640000 | 2.16726500  | 0.08556300  |
| 6      | -2.05230000 | -0.91265500 | 0.03830200  | 1  | 0.06117000  | 4.19512200  | 1.02090200  | 6      | -1.67927100 | 3.57640300  | 0.13386800  |
| 6      | -3.19585900 | -1.76038900 | 0.11780100  | 1  | -1.07884000 | 1.30885100  | -0.15121700 | 6      | -2.97226600 | 4.08913200  | -0.10802700 |
| 6      | -4.47858700 | -1.23642600 | -0.16597600 | 7  | 0.97957900  | -0.32328100 | -0.61376900 | 6      | -4.01380500 | 3.23311800  | -0.38097600 |
| 6      | -4.61107900 | 0.08584900  | -0.52944400 | 46 | -0.78753100 | -1.41788200 | 0.14364600  | 1      | -4.63812900 | 1.18822500  | -0.60502400 |
| 1      | -3.64061300 | 1.99616100  | -0.78065000 | 7  | 3.57492300  | 1.72139300  | 0.55058000  | 6      | -0.57741400 | 4.41731700  | 0.42792900  |
| 6      | -2.97091600 | -3.12342700 | 0.44793700  | 6  | 2.93198700  | 1.80984600  | -0.66837900 | 1      | -3.12443200 | 5.17046000  | -0.07404500 |
| 1      | -5.34702800 | -1.89703200 | -0.11142400 | 6  | 2.67821200  | 0.63439100  | -1.43675100 | 1      | -5.01599400 | 3.62089000  | -0.57188700 |
| 1      | -5.59397100 | 0.49162300  | -0.77829200 | 6  | 3.09582700  | -0.63721300 | -0.92083500 | 6      | 0.65197900  | 3.86621400  | 0.66470300  |
| 6      | -1.69687500 | -3.59670800 | 0.62119200  | 6  | 3.78107300  | -0.70282900 | 0.33737900  | 6      | 0.80736700  | 2.45856100  | 0.58506800  |
| 6      | -0.61703100 | -2.70365100 | 0.41018600  | 6  |             |             |             | 1      | -0.72372100 | 5.49889800  | 0.47034200  |

|    |             |             |             |   |             |             |             |        |             |             |             |
|----|-------------|-------------|-------------|---|-------------|-------------|-------------|--------|-------------|-------------|-------------|
| 1  | 1.51842000  | 4.48544600  | 0.90739300  | 1 | 6.10586400  | 0.26166300  | 2.04491800  | B-IM18 |             |             |             |
| 8  | 1.97909600  | 1.88305000  | 0.81681100  | 1 | 7.64809300  | 1.01022900  | 0.23727600  | 6      | 2.67750900  | -1.91495400 | 1.11459300  |
| 6  | -2.71774300 | -0.84481300 | -1.41373000 | 1 | 6.83232900  | 1.09987600  | -2.11796600 | 6      | 2.29874500  | -1.71139900 | -1.27489300 |
| 6  | -2.83830100 | -0.81973300 | 1.04997000  | 1 | 4.49613300  | 0.45058000  | -2.65155900 | 6      | 4.01569600  | -2.61120600 | 0.89573300  |
| 6  | -4.18384600 | -1.24318700 | -1.50075600 | 1 | 3.74224300  | -0.37792600 | 1.48589800  | 1      | 1.88160000  | -2.67973300 | 1.20000400  |
| 1  | -2.10039200 | -1.75799200 | -1.42557900 | 6 | 2.54142100  | -0.36828800 | -0.93946400 | 1      | 2.63954800  | -1.34267700 | 2.05118400  |
| 1  | -2.40749200 | -0.21977400 | -2.26294400 | 1 | 2.09261800  | 0.53035900  | -1.43090000 | 6      | 3.64215800  | -2.36610600 | -1.56804400 |
| 6  | -4.32175600 | -1.13283200 | 0.99618900  | 1 | 2.56483500  | -1.13365400 | -1.75610300 | 1      | 1.50270800  | -2.48159600 | -1.25986900 |
| 1  | -2.26840100 | -1.76084900 | 1.11028700  | 8 | 1.84300100  | -0.78251100 | 0.16313500  | 1      | 2.01784800  | -0.99894700 | -2.05964000 |
| 1  | -2.56641200 | -0.20657600 | 1.92145100  | 6 | 0.13627200  | -3.47435500 | 0.31965800  | 6      | 4.03416000  | -3.32133100 | -0.45061500 |
| 6  | -4.63891300 | -1.96063500 | -0.23956700 | 6 | 1.39756700  | -3.84980100 | -0.45652400 | 1      | 4.20677300  | -3.31863900 | 1.71783300  |
| 1  | -4.29316000 | -1.89989900 | -2.37756800 | 1 | 2.13145900  | -3.03802800 | -0.39335200 | 1      | 4.83502900  | -1.87216000 | 0.92972900  |
| 1  | -4.83829700 | -0.38109900 | -1.71027400 | 1 | 1.85950100  | -4.76884000 | -0.06254200 | 1      | 3.59761700  | -2.88773600 | -2.53692700 |
| 1  | -4.58721100 | -1.68093300 | 1.91323800  | 1 | 1.15281000  | -4.01913200 | -1.51545800 | 1      | 4.40929100  | -1.57825600 | -1.67420400 |
| 1  | -4.92838100 | -0.21117200 | 1.02032700  | 6 | -0.86223700 | -4.63446800 | 0.26898400  | 1      | 5.01968800  | -3.77229900 | -0.64389200 |
| 1  | -5.71076400 | -2.20416000 | -0.29143100 | 1 | -0.43379800 | -5.55526400 | 0.69374300  | 1      | 3.31569600  | -4.16130600 | -0.42718700 |
| 1  | -4.10573900 | -2.92482700 | -0.16468800 | 1 | -1.77372800 | -4.38915400 | 0.83570100  | 7      | 2.30085000  | -1.03465900 | 0.02103600  |
| 7  | -2.30215900 | -0.13361300 | -0.16594200 | 1 | -1.15674500 | -4.84322100 | -0.76999000 | 7      | 0.64966000  | 0.80838500  | -1.24275100 |
| 46 | -0.13021800 | -0.46320400 | 0.01175900  | 6 | 0.48172100  | -3.15936300 | 1.77422900  | 8      | -1.10665400 | 1.18070700  | -2.66490300 |
| 7  | -0.19168700 | 1.63819700  | 0.28063500  | 1 | 1.17932600  | -2.31204400 | 1.82116200  | 6      | -0.03304800 | 1.62622200  | -2.02444500 |
| 6  | 5.75200600  | 0.31207300  | 1.01110700  | 1 | -0.42680900 | -2.89838400 | 2.34059000  | 6      | 0.31801000  | 2.99054600  | -2.20519900 |
| 6  | 6.61843400  | 0.72984300  | 0.00138700  | 1 | 0.95205400  | -4.01946600 | 2.27640100  | 1      | -0.29054700 | 3.60741700  | -2.86661500 |
| 6  | 6.16054600  | 0.77892600  | -1.31717600 | 8 | -0.53422000 | -2.39522700 | -0.28577100 | 6      | 1.38051800  | 3.48324500  | -1.49816000 |
| 6  | 4.84946400  | 0.41530800  | -1.61529900 | 1 | 2.66907100  | 2.54389600  | 0.95303900  | 1      | 1.64940100  | 4.54075800  | -1.56818500 |
| 6  | 3.96992000  | 0.00105800  | -0.60646400 |   |             |             |             | 6      | 2.15863900  | 2.62979500  | -0.67072600 |
| 6  | 4.43773000  | -0.04975100 | 0.71026500  |   |             |             |             | 6      | 1.79036500  | 1.25385500  | -0.63253800 |

|    |             |             |             |       |             |             |             |    |             |             |             |
|----|-------------|-------------|-------------|-------|-------------|-------------|-------------|----|-------------|-------------|-------------|
| 6  | 2.60264500  | 0.32117100  | 0.09221000  | 1     | -0.14703100 | 2.33138100  | 3.99861700  | 6  | 4.76812200  | -2.17382900 | 0.79945600  |
| 6  | 3.62643300  | 0.83676700  | 0.88535900  | 1     | 0.74092900  | 0.78610900  | 4.07504200  | 1  | 5.80511900  | -2.28245000 | 1.12096200  |
| 1  | 4.23218700  | 0.15329800  | 1.48263500  | 6     | -1.09485400 | 2.04419500  | 1.42068900  | 6  | 4.19718000  | -0.89402400 | 0.72554300  |
| 6  | 3.92976900  | 2.20880200  | 0.90908700  | 1     | -1.75030400 | 1.61338800  | 0.64380200  | 1  | 4.81139800  | -0.03139800 | 0.97580500  |
| 1  | 4.75304800  | 2.55894100  | 1.53582600  | 1     | -1.67976100 | 2.80789900  | 1.95658000  | 6  | 2.87463900  | -0.72830300 | 0.33411000  |
| 6  | 3.23857900  | 3.09732100  | 0.11310200  | 1     | -0.25578300 | 2.55085100  | 0.91900800  | 8  | -1.94816500 | 0.11340100  | 0.03144400  |
| 1  | 3.50326100  | 4.15660200  | 0.08050900  | 6     | -1.76043200 | 0.26852800  | 3.05127700  | 6  | 2.61751600  | 1.18079200  | -1.17205300 |
| 6  | -2.26342500 | -1.76007100 | -0.94672100 | 1     | -1.40762600 | -0.55368000 | 3.69022300  | 6  | 2.39692000  | 1.55516300  | 1.25587300  |
| 1  | -2.22935500 | -2.81834800 | -0.61748700 | 1     | -2.33544700 | 0.97002000  | 3.67500800  | 6  | 3.98729300  | 1.83022300  | -1.16402500 |
| 8  | -1.44721300 | -1.40311900 | -1.86219200 | 1     | -2.45133200 | -0.15545300 | 2.30377600  | 1  | 1.85482800  | 1.94275700  | -1.40091100 |
| 1  | -1.23121700 | 0.21740600  | -2.46994800 | 6     | -0.58202900 | 0.95045600  | 2.35990700  | 1  | 2.52548300  | 0.39423500  | -1.93366100 |
| 1  | -1.14592700 | -1.76439900 | 1.06234900  | 8     | 0.21712600  | 0.01674200  | 1.67810700  | 6  | 3.70423900  | 2.33688100  | 1.27541100  |
| 6  | -3.49733100 | -1.04719600 | -0.56899800 |       |             |             |             | 1  | 1.55508500  | 2.25763500  | 1.15600100  |
| 6  | -3.84999000 | 0.20194300  | -1.10321200 |       |             |             |             | 1  | 2.23289200  | 1.00605800  | 2.19314700  |
| 6  | -4.34651900 | -1.65111900 | 0.37198800  | B-TS1 |             |             |             | 6  | 4.05565500  | 2.90549700  | -0.09107700 |
| 6  | -5.01869000 | 0.83204800  | -0.68931300 | 7     | 0.76829100  | -1.67339200 | -0.29823000 | 1  | 4.17558800  | 2.25492700  | -2.16137800 |
| 1  | -3.20247400 | 0.68738800  | -1.83519000 | 8     | -1.22202200 | -2.52964500 | -1.04982700 | 1  | 4.76982800  | 1.06873500  | -1.01171800 |
| 6  | -5.51310200 | -1.01748800 | 0.78462900  | 6     | -0.05716100 | -2.71463100 | -0.71354700 | 1  | 3.59000600  | 3.14616700  | 2.01271100  |
| 1  | -4.06958700 | -2.62304800 | 0.79187000  | 6     | 0.55909100  | -4.04192100 | -0.70353900 | 1  | 4.53329600  | 1.72185400  | 1.65635700  |
| 6  | -5.85065200 | 0.22956400  | 0.25670800  | 1     | -0.09422300 | -4.86163600 | -1.00811400 | 1  | 5.04789600  | 3.37979600  | -0.06800700 |
| 1  | -5.28403800 | 1.80559800  | -1.10753000 | 6     | 1.84700100  | -4.25056500 | -0.33316400 | 1  | 3.34378600  | 3.71015100  | -0.34696700 |
| 1  | -6.16171600 | -1.49502700 | 1.52230400  | 1     | 2.27222700  | -5.25884500 | -0.32453600 | 7  | 2.23123700  | 0.57437100  | 0.13969800  |
| 1  | -6.76459100 | 0.73209000  | 0.58125100  | 6     | 2.67892500  | -3.15085300 | 0.04677200  | 46 | 0.12491200  | 0.21253600  | 0.00760900  |
| 46 | -0.53619000 | -0.79633300 | 0.02565800  | 6     | 2.08126300  | -1.85781900 | 0.02036800  | 6  | -2.59656300 | -0.70218700 | 0.99229100  |
| 6  | 0.36085400  | 1.56289000  | 3.39708300  | 6     | 4.01884900  | -3.28312700 | 0.44649400  | 6  | -4.06209500 | -0.75636000 | 0.67138500  |
| 1  | 1.22313600  | 2.02589000  | 2.89578200  | 1     | 4.45835400  | -4.28357200 | 0.48054800  | 6  | -5.01542600 | -0.12566000 | 1.47562400  |

|   |             |             |             |  |  |  |  |    |             |             |             |
|---|-------------|-------------|-------------|--|--|--|--|----|-------------|-------------|-------------|
| 6 | -4.48122900 | -1.42404800 | -0.48791300 |  |  |  |  | 1  | 0.25083100  | -2.19639900 | 1.18168400  |
| 6 | -6.36953300 | -0.16893400 | 1.13981500  |  |  |  |  | 1  | -1.12789400 | -1.75619600 | 2.18614300  |
| 1 | -4.69283200 | 0.40256300  | 2.37855200  |  |  |  |  | 6  | -1.04543700 | -4.41371300 | -0.06548600 |
| 6 | -5.83095500 | -1.46462000 | -0.82492500 |  |  |  |  | 1  | -1.57751000 | -4.06180800 | -2.14551300 |
| 1 | -3.72576200 | -1.91106100 | -1.11065800 |  |  |  |  | 1  | -2.83200800 | -3.60630900 | -1.00124900 |
| 6 | -6.77879100 | -0.83790900 | -0.01200900 |  |  |  |  | 1  | -0.60820900 | -4.23686200 | 2.05292600  |
| 1 | -7.10640900 | 0.32375400  | 1.77913600  |  |  |  |  | 1  | -2.26693000 | -3.88532400 | 1.63530500  |
| 1 | -6.15062100 | -1.99168000 | -1.72748900 |  |  |  |  | 1  | -1.40967300 | -5.45127600 | -0.04033300 |
| 1 | -7.83823800 | -0.87252300 | -0.27796900 |  |  |  |  | 1  | 0.03277300  | -4.47667600 | -0.29945300 |
| 1 | -2.43520200 | -0.31394700 | 2.01616900  |  |  |  |  | 7  | -1.38679700 | -1.47269000 | 0.12356400  |
| 1 | -2.16479000 | -1.71319100 | 0.93698400  |  |  |  |  | 46 | -0.12554800 | 0.25275200  | -0.02967100 |
| 1 | -1.68393100 | 1.21815600  | 0.38491300  |  |  |  |  | 6  | 2.48881700  | -1.20857700 | -0.60734000 |
| 6 | -1.05206000 | 3.12843400  | -0.42945200 |  |  |  |  | 6  | 3.97311600  | -0.98385700 | -0.54162400 |
| 6 | -2.38753000 | 3.74511000  | -0.02497700 |  |  |  |  | 6  | 4.48838200  | 0.29060900  | -0.81476400 |
| 1 | -2.34746700 | 4.10575200  | 1.01209200  |  |  |  |  | 6  | 4.85502900  | -2.00744200 | -0.18466600 |
| 1 | -2.65192700 | 4.59283100  | -0.67348900 |  |  |  |  | 6  | 5.85654800  | 0.53317400  | -0.73077300 |
| 1 | -3.19574000 | 3.00215800  | -0.09507500 |  |  |  |  | 1  | 3.80235700  | 1.09734100  | -1.09390700 |
| 8 | -0.79341100 | 2.07258200  | 0.50470900  |  |  |  |  | 6  | 6.22724900  | -1.76835700 | -0.10676700 |
| 6 | -1.13533900 | 2.58016400  | -1.85002400 |  |  |  |  | 1  | 4.46140200  | -3.00436600 | 0.03507700  |
| 1 | -1.36343600 | 3.37571200  | -2.57468900 |  |  |  |  | 6  | 6.72993900  | -0.49714300 | -0.37749800 |
| 1 | -0.18249100 | 2.11696600  | -2.15183400 |  |  |  |  | 1  | 6.24574700  | 1.53096700  | -0.94728400 |
| 1 | -1.91432500 | 1.80907700  | -1.93087000 |  |  |  |  | 1  | 6.90595700  | -2.57819600 | 0.17123600  |
| 6 | 0.06041000  | 4.15901500  | -0.30993000 |  |  |  |  | 1  | 7.80402100  | -0.30768000 | -0.31441600 |
| 1 | -0.13030600 | 5.03356000  | -0.94894100 |  |  |  |  | 1  | 2.10525000  | -0.86977700 | -1.59135700 |
| 1 | 0.15644000  | 4.50809200  | 0.72829200  |  |  |  |  | 1  | 2.26044000  | -2.28580500 | -0.52338500 |
| 1 | 1.02907500  | 3.73621300  | -0.61528700 |  |  |  |  | 1  | 1.93781200  | 0.59138000  | 0.30571200  |

B-TS1<sup>iso</sup>

|       |             |            |             |   |             |             |             |       |             |             |             |
|-------|-------------|------------|-------------|---|-------------|-------------|-------------|-------|-------------|-------------|-------------|
| 6     | 1.35826500  | 2.66498300 | 1.08924900  | 1 | -0.42699100 | 2.91044400  | 2.74852700  | 1     | 1.50201300  | 0.58518600  | -1.82428500 |
| 6     | 2.63292100  | 3.48070700 | 0.89287000  | 1 | -1.94913300 | 2.64647100  | 1.90229400  | 6     | 3.30469300  | -0.34609900 | -0.42002300 |
| 1     | 2.61551000  | 3.98532800 | -0.08238100 | 1 | -0.88719800 | 4.61655800  | -1.18527900 | 6     | 3.07896200  | -1.12526300 | 0.72593200  |
| 1     | 2.73756000  | 4.24495100 | 1.67693400  | 1 | -2.29667800 | 3.89621200  | -0.44800600 | 6     | 4.23193700  | 0.70052200  | -0.38705600 |
| 1     | 3.52240200  | 2.83463000 | 0.93035400  | 1 | -1.01776900 | 4.92814100  | 1.34525200  | 6     | 3.77871200  | -0.83937100 | 1.89439900  |
| 8     | 1.33286800  | 1.73541500 | 0.00236500  | 1 | 0.47977000  | 4.17775500  | 0.80257100  | 1     | 2.34286200  | -1.93794200 | 0.67788600  |
| 6     | 1.40615000  | 1.92176500 | 2.42283700  | 7 | -0.85066900 | 1.27877500  | -0.26203500 | 6     | 4.92812200  | 0.98049300  | 0.78688100  |
| 1     | 1.42972500  | 2.62164000 | 3.27092400  | 7 | -0.99467300 | -1.38734800 | 0.06128300  | 1     | 4.40469700  | 1.29881400  | -1.28768600 |
| 1     | 0.51603000  | 1.28188200 | 2.54220100  | 8 | 0.25990900  | -3.23944100 | 0.53283400  | 6     | 4.69983100  | 0.21126600  | 1.92862800  |
| 1     | 2.29430000  | 1.27612000 | 2.49381900  | 6 | -0.84189700 | -2.70313300 | 0.47489000  | 1     | 3.60725700  | -1.44369400 | 2.78820800  |
| 6     | 0.13719600  | 3.56636400 | 1.03228100  | 6 | -2.08918500 | -3.38742800 | 0.82897000  | 1     | 5.65404000  | 1.79660800  | 0.81156100  |
| 1     | 0.17392500  | 4.32250800 | 1.83054900  | 1 | -1.99159600 | -4.43892200 | 1.10606000  | 1     | 5.24712500  | 0.42821400  | 2.84919800  |
| 1     | 0.06561400  | 4.06958600 | 0.06094900  | 6 | -3.29445200 | -2.76145200 | 0.81545300  | 46    | 0.44141800  | -0.30128200 | -0.96231300 |
| 1     | -0.78235900 | 2.97688800 | 1.16978600  | 1 | -4.20875600 | -3.30506200 | 1.07377600  |       |             |             |             |
|       |             |            |             | 6 | -3.39408400 | -1.37387400 | 0.47388100  |       |             |             |             |
|       |             |            |             | 6 | -2.17504800 | -0.72349900 | 0.13741800  | B-TS3 |             |             |             |
| B-TS2 |             |            |             | 6 | -2.17998000 | 0.66950100  | -0.13509800 | 6     | -2.00289800 | -1.80763200 | -1.24754900 |
| 6     | -0.26841400 | 1.56436600 | 1.09542700  | 6 | -3.38359800 | 1.35578600  | -0.19423700 | 6     | -1.08147700 | -1.97902700 | 1.01956100  |
| 6     | -0.76269500 | 2.49258500 | -1.12734900 | 1 | -3.40900300 | 2.41717200  | -0.43337200 | 6     | -3.08590800 | -2.81957100 | -0.91558000 |
| 6     | -0.86624800 | 2.79367300 | 1.74691500  | 6 | -4.59625500 | 0.69246300  | 0.06230900  | 1     | -1.13776900 | -2.33781300 | -1.68201600 |
| 1     | 0.81721800  | 1.70666200 | 0.95392300  | 1 | -5.53327900 | 1.24803700  | -0.00157600 | 1     | -2.33569000 | -1.07349500 | -1.99458000 |
| 1     | -0.39466400 | 0.65553400 | 1.69882400  | 6 | -4.59503600 | -0.64577500 | 0.41969500  | 6     | -2.13567600 | -3.00362800 | 1.40414600  |
| 6     | -1.20201600 | 3.81287200 | -0.50202700 | 1 | -5.53308800 | -1.15860400 | 0.64905700  | 1     | -0.18401900 | -2.50991700 | 0.65696400  |
| 1     | 0.29953100  | 2.58373900 | -1.39807200 | 6 | 2.53202000  | -0.64641200 | -1.66110000 | 1     | -0.76651800 | -1.36565200 | 1.87558700  |
| 1     | -1.30806700 | 2.27310400 | -2.05586900 | 1 | 2.96899000  | -0.23634900 | -2.60081800 | 6     | -2.62558900 | -3.76767400 | 0.18243500  |
| 6     | -0.61032300 | 4.01708000 | 0.88298200  | 8 | 1.79941700  | -1.69292200 | -1.73056700 | 1     | -3.32926300 | -3.37672600 | -1.83300300 |

|   |             |             |             |       |             |             |             |   |             |             |             |
|---|-------------|-------------|-------------|-------|-------------|-------------|-------------|---|-------------|-------------|-------------|
| 1 | -4.01846900 | -2.30859700 | -0.62857100 | 6     | 3.52710200  | -1.37516600 | 0.87008000  | 1 | -1.08913000 | 4.60682700  | -1.62253100 |
| 1 | -1.69229900 | -3.69162700 | 2.14008200  | 6     | 4.27657800  | 0.66701900  | -0.18999800 | 1 | 0.25095300  | 4.44973000  | -0.49183100 |
| 1 | -2.97514400 | -2.52016900 | 1.92776400  | 6     | 4.42409400  | -1.16026300 | 1.91260000  | 1 | -1.97577900 | 3.58181500  | 2.47426100  |
| 1 | -3.42634300 | -4.47107900 | 0.45524800  | 1     | 2.87900500  | -2.25491400 | 0.84945400  | 1 | -0.32816600 | 4.01107200  | 2.07972500  |
| 1 | -1.79789800 | -4.38745700 | -0.20624900 | 6     | 5.16806700  | 0.88285500  | 0.85670900  | 1 | -1.78887700 | 5.37597400  | 0.67604200  |
| 7 | -1.47979300 | -1.04866200 | -0.07583300 | 1     | 4.19734700  | 1.39066700  | -1.00677000 | 1 | -2.71529300 | 3.96880700  | 0.16332600  |
| 7 | -0.52324400 | 1.51201100  | -0.34377300 | 6     | 5.24513100  | -0.03133900 | 1.90862700  | 7 | -0.22403000 | 1.76031900  | 0.11412400  |
| 6 | 0.10353600  | 2.73220100  | -0.53898500 | 1     | 4.48766000  | -1.87822900 | 2.73383900  | 7 | 1.21898000  | -0.12188600 | -1.17625200 |
| 6 | -0.67936300 | 3.90090500  | -0.15372600 | 1     | 5.80424800  | 1.77071400  | 0.85500900  | 6 | 1.79294900  | -1.08008000 | -1.99696800 |
| 1 | -0.20022400 | 4.86975100  | -0.30359200 | 1     | 5.94734500  | 0.13716000  | 2.72843800  | 6 | 3.23700400  | -0.95040600 | -2.18273100 |
| 6 | -1.93121600 | 3.79364600  | 0.36363700  | 46    | 0.43641000  | -0.18951100 | -0.77579500 | 1 | 3.69637300  | -1.68607700 | -2.84580400 |
| 1 | -2.49467400 | 4.68873000  | 0.64442800  | 8     | 1.24198900  | 2.80616500  | -1.00589200 | 6 | 3.97449300  | -0.01001200 | -1.53617200 |
| 6 | -2.54185300 | 2.51436900  | 0.55519000  |       |             |             |             | 1 | 5.06081000  | 0.03043900  | -1.66276800 |
| 6 | -1.77252300 | 1.37598900  | 0.17582800  |       |             |             |             | 6 | 3.34745000  | 0.94528900  | -0.67520400 |
| 6 | -2.31920700 | 0.07425400  | 0.34189800  | B-TS4 |             |             |             | 6 | 1.93292100  | 0.86166700  | -0.56417200 |
| 6 | -3.59711000 | -0.06275800 | 0.87339300  | 8     | 1.12771900  | -1.98778200 | -2.49432500 | 6 | 1.23494300  | 1.81345100  | 0.21917900  |
| 1 | -4.03333300 | -1.05100900 | 1.00768600  | 8     | -1.88737100 | -3.04043800 | 0.58032500  | 6 | 1.94192500  | 2.75420000  | 0.95225400  |
| 6 | -4.35262100 | 1.05973300  | 1.24808800  | 6     | -0.68949700 | 2.58705100  | -1.04200100 | 1 | 1.41730800  | 3.47835600  | 1.57381800  |
| 1 | -5.35187500 | 0.92009900  | 1.66383100  | 6     | -0.99000900 | 2.05885100  | 1.35691200  | 6 | 3.34617000  | 2.79373500  | 0.89657900  |
| 6 | -3.82828800 | 2.33067600  | 1.08839600  | 6     | -0.75812600 | 4.06673300  | -0.72310000 | 1 | 3.88501400  | 3.53306000  | 1.49135000  |
| 1 | -4.40849000 | 3.21135300  | 1.37671600  | 1     | -1.69121200 | 2.22409700  | -1.32185500 | 6 | 4.03344000  | 1.91812800  | 0.07375700  |
| 6 | 2.50514800  | -0.71092200 | -1.31814400 | 1     | -0.02537900 | 2.36356000  | -1.88778500 | 1 | 5.12379800  | 1.96084300  | 0.00684800  |
| 1 | 2.87642500  | -0.34775500 | -2.30324500 | 6     | -1.22910800 | 3.53244600  | 1.66701500  | 6 | -0.71365100 | -2.95132000 | 0.01424500  |
| 8 | 1.72457700  | -1.74205200 | -1.30921800 | 1     | -1.96236400 | 1.55947800  | 1.23454300  | 1 | -0.50087700 | -3.69155900 | -0.79211300 |
| 1 | 1.68910800  | 0.64769800  | -1.29974100 | 1     | -0.48052300 | 1.53897700  | 2.18093700  | 6 | 0.49612100  | -2.72533400 | 0.88844200  |
| 6 | 3.45153300  | -0.46376700 | -0.18870800 | 6     | -1.70082600 | 4.30413700  | 0.44529000  | 6 | 1.77839300  | -3.06077900 | 0.44292400  |

|    |             |             |             |       |             |             |             |    |             |             |             |
|----|-------------|-------------|-------------|-------|-------------|-------------|-------------|----|-------------|-------------|-------------|
| 6  | 0.34216300  | -2.13497700 | 2.14924200  |       |             |             |             | 6  | -3.80155000 | -3.03403600 | -0.53021200 |
| 6  | 2.89358300  | -2.77518700 | 1.22919500  |       |             |             |             | 1  | -4.68975800 | -3.60958800 | -0.80453300 |
| 1  | 1.89797000  | -3.52186400 | -0.54137500 | B-TS5 |             |             |             | 6  | -3.86545000 | -1.61221500 | -0.54386300 |
| 6  | 1.45605100  | -1.84718100 | 2.93284900  | 8     | -0.42580800 | -3.55425700 | 0.50030700  | 6  | -2.68350600 | -0.90800000 | -0.17964000 |
| 1  | -0.66764600 | -1.90376800 | 2.50117600  | 1     | 0.40376500  | -2.99251900 | 1.00616200  | 6  | -2.72412300 | 0.51682300  | -0.11840800 |
| 6  | 2.73729600  | -2.15858400 | 2.47048800  | 8     | 1.44733300  | -2.37448400 | 1.47447400  | 6  | -3.86932300 | 1.18082600  | -0.52991800 |
| 1  | 3.89264100  | -3.03109700 | 0.86698300  | 6     | -1.38809900 | 1.05788800  | 1.85733300  | 1  | -3.89651800 | 2.26957300  | -0.51817500 |
| 1  | 1.32800000  | -1.38135300 | 3.91346200  | 6     | -1.34258200 | 2.59005700  | -0.05406600 | 6  | -5.01187300 | 0.47759900  | -0.95214800 |
| 1  | 3.61220600  | -1.92971800 | 3.08371600  | 6     | -2.24711100 | 2.03594600  | 2.63321200  | 1  | -5.89496200 | 1.03422900  | -1.27136000 |
| 46 | -0.64414100 | -0.31532200 | -0.43383400 | 1     | -0.32180000 | 1.24353200  | 2.07249300  | 6  | -5.02069900 | -0.89950200 | -0.93134200 |
| 1  | -0.70026600 | -2.01292300 | -0.84099000 | 1     | -1.58968600 | 0.01351700  | 2.12856900  | 1  | -5.91001600 | -1.46100600 | -1.22812800 |
| 6  | -3.75019500 | -0.63920000 | -0.23197100 | 6     | -2.05395900 | 3.66121300  | 0.76711000  | 6  | 2.14642400  | -2.10305600 | 0.44642300  |
| 6  | -4.78015400 | -1.45199900 | 0.54163500  | 1     | -0.25009600 | 2.73725600  | -0.01009400 | 1  | 2.17617500  | -2.85370300 | -0.37843200 |
| 1  | -4.87870200 | -1.07694300 | 1.56961400  | 1     | -1.61838100 | 2.65117100  | -1.11623800 | 6  | 3.39122100  | -1.31414600 | 0.57537200  |
| 1  | -5.76621300 | -1.39305700 | 0.05962700  | 6     | -1.87210200 | 3.45936400  | 2.26176800  | 6  | 3.45858800  | -0.21895500 | 1.44470300  |
| 1  | -4.48575300 | -2.50907800 | 0.58904900  | 1     | -2.11409200 | 1.85037600  | 3.70962500  | 6  | 4.52016400  | -1.68149500 | -0.16412200 |
| 6  | -3.56722600 | -1.19628200 | -1.63735700 | 1     | -3.31464600 | 1.84928200  | 2.41787500  | 6  | 4.64429900  | 0.49419500  | 1.57273200  |
| 1  | -4.50383700 | -1.16079800 | -2.21260000 | 1     | -1.66050800 | 4.63945300  | 0.45030000  | 1  | 2.56128900  | 0.07229600  | 1.99550700  |
| 1  | -2.80774900 | -0.62016000 | -2.19073400 | 1     | -3.13273800 | 3.69325000  | 0.54352500  | 6  | 5.71291700  | -0.97665100 | -0.02364400 |
| 1  | -3.23304600 | -2.24251700 | -1.59264300 | 1     | -2.46514600 | 4.19346200  | 2.82749700  | 1  | 4.45985600  | -2.53109100 | -0.85144400 |
| 6  | -4.15033800 | 0.82460900  | -0.27325000 | 1     | -0.81763800 | 3.63698400  | 2.53789100  | 6  | 5.77364100  | 0.11508400  | 0.84189700  |
| 1  | -4.26968400 | 1.23221200  | 0.74150600  | 7     | -1.55049400 | 1.18790000  | 0.37658700  | 1  | 4.69134300  | 1.35758800  | 2.24053900  |
| 1  | -3.39096300 | 1.42256100  | -0.79847100 | 7     | -1.49867500 | -1.55390200 | 0.08670000  | 1  | 6.59476300  | -1.27386700 | -0.59573800 |
| 1  | -5.10100900 | 0.96173200  | -0.80768100 | 6     | -1.47845300 | -2.89587200 | 0.15981100  | 1  | 6.70445200  | 0.67836800  | 0.94491100  |
| 8  | -2.50615700 | -0.73737600 | 0.49073000  | 6     | -2.64939200 | -3.65990800 | -0.16577100 | 46 | 0.13582400  | -0.18133700 | -0.22538100 |
| 1  | -2.30491400 | -1.85179700 | 0.67815000  | 1     | -2.56032800 | -4.74553000 | -0.11708600 | 1  | 1.35216400  | -1.24033900 | -0.49783100 |

|       |            |             |             |   |             |             |             |   |             |             |             |
|-------|------------|-------------|-------------|---|-------------|-------------|-------------|---|-------------|-------------|-------------|
| 6     | 1.92044500 | 1.65191400  | -1.74261700 | 1 | 3.59545500  | 3.31410500  | -1.55028300 | 1 | -3.62923500 | -0.84809300 | 2.58598200  |
| 6     | 3.04044100 | 0.69491400  | -2.14232400 | 1 | 5.52367200  | 4.15178900  | -0.23079300 | 1 | -3.17620700 | -2.47401000 | 2.12086400  |
| 1     | 2.66471500 | -0.33972800 | -2.18917300 | 6 | 0.02614400  | 2.18618500  | -0.14461200 | 1 | -3.91177000 | -1.83617400 | -1.60062400 |
| 1     | 3.46122700 | 0.94221000  | -3.12959600 | 6 | -1.09696300 | 2.29773000  | -1.08482700 | 1 | -3.22197800 | -3.04657600 | -0.52584300 |
| 1     | 3.85501100 | 0.73074300  | -1.40565300 | 8 | -0.94266500 | 2.24752700  | -2.30188500 | 1 | -5.02765500 | -1.74453000 | 0.66204400  |
| 6     | 2.48761400 | 3.06742400  | -1.61569400 | 6 | -2.48984000 | 2.38991600  | -0.52270000 | 1 | -4.19040500 | -0.24075800 | 0.27924100  |
| 1     | 2.94942500 | 3.40354500  | -2.55640100 | 6 | -3.55716600 | 2.27922400  | -1.42738500 | 7 | -1.07771800 | -1.39806700 | 0.31706500  |
| 1     | 1.69573700 | 3.78222000  | -1.34780500 | 6 | -2.78180800 | 2.56855600  | 0.83803200  | 7 | 1.50060300  | -1.63893100 | -0.51276700 |
| 1     | 3.25198400 | 3.10006500  | -0.82638300 | 6 | -4.87508900 | 2.33837800  | -0.98789600 | 8 | 3.25762900  | -0.47004300 | -1.33340600 |
| 6     | 0.82429000 | 1.62553300  | -2.80969300 | 1 | -3.31159700 | 2.14880700  | -2.48397900 | 6 | 2.77760300  | -1.57276400 | -0.99113700 |
| 1     | 0.37765400 | 0.61907400  | -2.87198600 | 6 | -4.10278300 | 2.63169700  | 1.28035400  | 6 | 3.50202400  | -2.82739000 | -1.05271900 |
| 1     | 0.02072000 | 2.33797200  | -2.57266400 | 1 | -1.97641500 | 2.67259500  | 1.56807700  | 1 | 4.51763300  | -2.79937900 | -1.44978100 |
| 1     | 1.21393900 | 1.88278400  | -3.80707000 | 6 | -5.15224600 | 2.51491500  | 0.36965000  | 6 | 2.93799000  | -3.98626700 | -0.60569300 |
| 8     | 1.40690400 | 1.33902800  | -0.47428300 | 1 | -5.69448000 | 2.25034700  | -1.70540800 | 1 | 3.50534000  | -4.92119100 | -0.63990600 |
|       |            |             |             | 1 | -4.31323700 | 2.77950800  | 2.34235200  | 6 | 1.60889600  | -4.01256900 | -0.07893300 |
|       |            |             |             | 1 | -6.18690100 | 2.56539000  | 0.71715200  | 6 | 0.91223500  | -2.77227100 | -0.06986600 |
|       |            |             |             | 1 | -0.11710000 | 2.52358100  | 0.88673700  | 6 | -0.41873400 | -2.69493700 | 0.42502400  |
| B-TS6 |            |             |             | 6 | -1.77223700 | -0.91124500 | 1.53689700  | 6 | -1.00770800 | -3.84573100 | 0.93067000  |
| 6     | 4.71702300 | 3.49350200  | 1.66099300  | 6 | -1.96380600 | -1.32313200 | -0.88277200 | 1 | -2.02448600 | -3.81639800 | 1.32069000  |
| 6     | 3.65447200 | 2.84937000  | 2.29775200  | 6 | -3.18500000 | -1.43201800 | 1.76430500  | 6 | -0.31340800 | -5.07046800 | 0.94601400  |
| 6     | 2.57450200 | 2.38252800  | 1.55605100  | 1 | -1.83272300 | 0.18510800  | 1.43179100  | 1 | -0.80397800 | -5.95589400 | 1.35421500  |
| 6     | 2.52934000 | 2.55852500  | 0.16481000  | 1 | -1.11461800 | -1.11208900 | 2.39473300  | 6 | 0.97035100  | -5.15551300 | 0.43801400  |
| 6     | 3.60929100 | 3.19062200  | -0.46423500 | 6 | -3.32506600 | -1.95828600 | -0.67736600 | 1 | 1.50645000  | -6.10830900 | 0.43962100  |
| 6     | 4.69172900 | 3.65897600  | 0.27750700  | 1 | -2.10235500 | -0.25511500 | -1.12349900 | 6 | 1.37496600  | 2.09329000  | -0.64513300 |
| 1     | 5.56761600 | 3.85557600  | 2.24289100  | 1 | -1.41362000 | -1.76595800 | -1.72484000 | 1 | 1.46717100  | 2.28423900  | -1.72327600 |
| 1     | 3.67404500 | 2.70127900  | 3.38005100  | 6 | -4.02868600 | -1.31093300 | 0.50501800  | 1 | 1.96595000  | 0.59165600  | -0.91669700 |
| 1     | 1.75777100 | 1.85215500  | 2.05628600  |   |             |             |             |   |             |             |             |



|                      |             |             |             |   |             |             |             |       |             |             |             |
|----------------------|-------------|-------------|-------------|---|-------------|-------------|-------------|-------|-------------|-------------|-------------|
| 46                   | 0.53460000  | 0.14626400  | -0.25631400 | 1 | 7.21059000  | -0.11257600 | 1.97580200  | 1     | -0.55822300 | -5.67446600 | -1.17307800 |
|                      |             |             |             | 1 | 5.73744400  | -0.87720500 | -2.00372300 | 6     | -1.48767000 | -3.88791700 | -0.34713900 |
|                      |             |             |             | 1 | 7.58612000  | -0.95367600 | -0.33849300 | 6     | -1.29221400 | -2.48751000 | -0.17386400 |
| B-TS6 <sup>iso</sup> |             |             |             | 1 | 2.19759800  | 1.71484500  | -0.91412300 | 6     | -2.30903700 | -1.70808000 | 0.44690500  |
| 6                    | -2.01815200 | 4.58502200  | -1.76373300 | 6 | -2.42778900 | 0.43246000  | 1.74873200  | 6     | -3.44831200 | -2.34254800 | 0.92450200  |
| 6                    | -1.07533400 | 3.78697300  | -2.41760700 | 6 | -2.76011500 | 0.40618600  | -0.68137900 | 1     | -4.23426400 | -1.76497600 | 1.40796600  |
| 6                    | -0.20055700 | 2.98918000  | -1.68922500 | 6 | -3.89397900 | 0.78172200  | 1.97692800  | 6     | -3.62050700 | -3.73117500 | 0.78994400  |
| 6                    | -0.24068100 | 2.96895900  | -0.27986600 | 1 | -1.86106500 | 1.37861100  | 1.72635800  | 1     | -4.52425900 | -4.19971300 | 1.18340700  |
| 6                    | -1.19140300 | 3.78550500  | 0.36173600  | 1 | -2.01247000 | -0.16513600 | 2.57246200  | 6     | -2.65929600 | -4.48901900 | 0.14590100  |
| 6                    | -2.06873700 | 4.58220200  | -0.37020200 | 6 | -4.25099800 | 0.61259100  | -0.49459600 | 1     | -2.79305900 | -5.56676600 | 0.01923500  |
| 1                    | -2.70536300 | 5.20870900  | -2.33947300 | 1 | -2.27790700 | 1.39057100  | -0.80791200 | 6     | 0.60012500  | 2.08171800  | 0.52107100  |
| 1                    | -1.02662500 | 3.78339600  | -3.50904500 | 1 | -2.52591200 | -0.18344600 | -1.57916300 | 1     | 0.53105700  | 2.20328900  | 1.60965800  |
| 1                    | 0.51493600  | 2.35241400  | -2.21758800 | 6 | -4.50915200 | 1.44275300  | 0.75309400  | 1     | 1.57548600  | -0.08261500 | -0.55954000 |
| 1                    | -1.22972900 | 3.79299300  | 1.45542900  | 1 | -3.94471900 | 1.45340000  | 2.84807800  | 46    | 0.11795500  | 0.07901300  | 0.01876400  |
| 1                    | -2.79615100 | 5.20845200  | 0.15243100  | 1 | -4.47985800 | -0.10373400 | 2.26616900  |       |             |             |             |
| 6                    | 1.78789800  | 1.43117000  | 0.06405800  | 1 | -4.65141700 | 1.11229200  | -1.38980500 |       |             |             |             |
| 6                    | 2.82242700  | 1.07605600  | 1.11113200  | 1 | -4.76803600 | -0.36033800 | -0.43338500 | B-TS7 |             |             |             |
| 8                    | 2.59571000  | 1.27190900  | 2.29211100  | 1 | -5.58532300 | 1.61506400  | 0.90394000  | 1     | -1.08184000 | -0.36670400 | 0.31513000  |
| 6                    | 4.12364800  | 0.51646300  | 0.65762600  | 1 | -4.05534100 | 2.44071200  | 0.61201700  | 6     | -2.24012200 | 0.84710100  | -0.99570300 |
| 6                    | 5.16499200  | 0.44679300  | 1.59716700  | 7 | -2.09891000 | -0.26395400 | 0.47702000  | 6     | -1.22719200 | -0.27840100 | -1.05968400 |
| 6                    | 4.34421500  | 0.04129700  | -0.64388300 | 7 | -0.15107300 | -1.87608800 | -0.57698900 | 6     | -1.74724900 | -1.63872600 | -1.36927800 |
| 6                    | 6.40372800  | -0.06961600 | 1.24061200  | 8 | 1.93269100  | -1.94383900 | -1.50453900 | 6     | -3.11758100 | -1.93498200 | -1.45796300 |
| 1                    | 4.96926000  | 0.80997600  | 2.60825700  | 6 | 0.89012800  | -2.53637700 | -1.19132600 | 6     | -0.83793300 | -2.69293200 | -1.57523400 |
| 6                    | 5.58289800  | -0.49019700 | -0.99455200 | 6 | 0.68648500  | -3.95920800 | -1.42785100 | 6     | -3.55677100 | -3.22763300 | -1.74015700 |
| 1                    | 3.54078800  | 0.03167200  | -1.38261200 | 1 | 1.49570200  | -4.49050500 | -1.93146900 | 1     | -3.86057400 | -1.14891900 | -1.30230000 |
| 6                    | 6.61431600  | -0.53994600 | -0.05821300 | 6 | -0.43901200 | -4.59880200 | -1.01026400 | 6     | -1.27573600 | -3.98251800 | -1.85542300 |

|   |             |             |             |    |            |             |             |       |             |             |             |
|---|-------------|-------------|-------------|----|------------|-------------|-------------|-------|-------------|-------------|-------------|
| 1 | 0.23532100  | -2.47617200 | -1.50932700 | 1  | 2.55519400 | -1.56264900 | 2.41380900  | 1     | -0.47264300 | -0.00826100 | -1.82759900 |
| 6 | -2.64256000 | -4.25993800 | -1.93740100 | 6  | 3.11397300 | 1.56634900  | 3.84685800  | 6     | -0.94960500 | -1.71766700 | 1.95157500  |
| 1 | -4.63002700 | -3.42778700 | -1.79807000 | 1  | 3.34058100 | 3.29890300  | 2.55042100  | 1     | -0.36287400 | -2.45209900 | 1.36355200  |
| 1 | -0.54441400 | -4.77900200 | -2.01575800 | 1  | 4.46887400 | 1.99187600  | 2.20463000  | 8     | -0.72105900 | -0.39428700 | 1.51484900  |
| 1 | -2.98939400 | -5.27289600 | -2.15488900 | 1  | 2.81149100 | -0.42107700 | 4.66535600  | 6     | -2.40455900 | -2.09762800 | 1.90056700  |
| 6 | -1.68556800 | 2.19639300  | -0.60857300 | 1  | 4.24834500 | -0.26114600 | 3.68407700  | 6     | -3.40102400 | -1.12534100 | 2.04497200  |
| 6 | -2.63225900 | 3.35306400  | -0.58111500 | 1  | 3.78732300 | 1.93785300  | 4.63354500  | 6     | -2.78299100 | -3.42826400 | 1.69702700  |
| 6 | -2.12547100 | 4.61605700  | -0.24105200 | 1  | 2.09468800 | 1.86148500  | 4.15303900  | 6     | -4.74813200 | -1.47831800 | 1.98190600  |
| 6 | -3.99762000 | 3.22830400  | -0.87797500 | 7  | 2.55487200 | 0.19768600  | 1.27501900  | 1     | -3.10690400 | -0.08384500 | 2.20071200  |
| 6 | -2.96013900 | 5.72639700  | -0.19739400 | 7  | 2.20515600 | 0.01719400  | -1.41434700 | 6     | -4.12858300 | -3.78322600 | 1.64101900  |
| 1 | -1.05983800 | 4.69549500  | -0.01622300 | 8  | 0.80081900 | 0.35793800  | -3.19689500 | 1     | -2.01202000 | -4.19096700 | 1.54989600  |
| 6 | -4.83484400 | 4.34038500  | -0.83270700 | 6  | 1.93654200 | 0.14750800  | -2.76841300 | 6     | -5.11644000 | -2.80851600 | 1.77952800  |
| 1 | -4.41714700 | 2.25661600  | -1.14767900 | 6  | 3.07929100 | -0.00179100 | -3.66655300 | 1     | -5.51697500 | -0.70928900 | 2.09388700  |
| 6 | -4.31813100 | 5.59036600  | -0.49294000 | 1  | 2.85316100 | 0.08798900  | -4.73036000 | 1     | -4.40759800 | -4.82516600 | 1.46514300  |
| 1 | -2.55408200 | 6.70566900  | 0.06649500  | 6  | 4.33214100 | -0.25774300 | -3.21488200 | 1     | -6.17227100 | -3.08468700 | 1.72614000  |
| 1 | -5.89648100 | 4.23181700  | -1.06536200 | 1  | 5.16465900 | -0.39009000 | -3.91265300 | 1     | -0.57560100 | -1.80110600 | 2.99074100  |
| 1 | -4.97579900 | 6.46221000  | -0.45958700 | 6  | 4.58781500 | -0.35441100 | -1.81191400 | 1     | -2.74589300 | 0.95974700  | -1.97393500 |
| 8 | -0.51333000 | 2.35738000  | -0.31260900 | 6  | 3.47474500 | -0.16739500 | -0.94339200 |       |             |             |             |
| 1 | -3.06113600 | 0.62148600  | -0.28791000 | 6  | 3.69483300 | -0.18578900 | 0.45820500  |       |             |             |             |
| 6 | 2.47182900  | 1.68402900  | 1.44724500  | 6  | 4.95253800 | -0.48404700 | 0.96289000  | B-TS8 |             |             |             |
| 6 | 2.37938800  | -0.48939500 | 2.57775400  | 1  | 5.11768100 | -0.51446600 | 2.03867600  | 1     | 1.81908300  | 0.32278200  | 0.92375900  |
| 6 | 3.42696700  | 2.20331500  | 2.50275800  | 6  | 6.03164700 | -0.73644500 | 0.10077600  | 6     | 2.03516500  | -0.96814800 | 1.17219600  |
| 1 | 1.43076300  | 1.91190900  | 1.73225000  | 1  | 7.00995400 | -0.98003800 | 0.51831900  | 6     | 0.93794300  | -1.17822100 | 2.19272600  |
| 1 | 2.63236700  | 2.13837900  | 0.46023900  | 6  | 5.85121500 | -0.64615900 | -1.26774600 | 6     | 0.36685600  | -2.57021000 | 2.33519800  |
| 6 | 3.19528000  | 0.05136900  | 3.74811100  | 1  | 6.68807400 | -0.81360000 | -1.95104900 | 6     | 0.82125700  | -3.67186300 | 1.60326200  |
| 1 | 1.31037900  | -0.36788200 | 2.81833900  | 46 | 0.78384500 | -0.12904800 | 0.05579700  | 6     | -0.70189300 | -2.76960300 | 3.22403000  |

|   |             |             |             |   |             |             |             |       |             |             |             |
|---|-------------|-------------|-------------|---|-------------|-------------|-------------|-------|-------------|-------------|-------------|
| 6 | 0.22358200  | -4.92614700 | 1.74382400  | 1 | -2.25018900 | -0.06007400 | -2.78518100 | 6     | -5.51268400 | 2.35665400  | -0.25069400 |
| 1 | 1.65810600  | -3.55568300 | 0.90924600  | 6 | -3.25842000 | -2.76163100 | -0.14091300 | 1     | -6.30498600 | 3.09974700  | -0.12687800 |
| 6 | -1.29806400 | -4.01831500 | 3.37173400  | 1 | -1.32366400 | -1.96758300 | 0.29538400  | 46    | -0.56109100 | 0.58960200  | -0.19951800 |
| 1 | -1.07296600 | -1.91916000 | 3.80546500  | 1 | -2.61221900 | -1.18527200 | 1.22920700  | 1     | 0.08852400  | -0.49841100 | 1.97764000  |
| 6 | -0.83896600 | -5.10612000 | 2.62604400  | 6 | -2.95650700 | -3.23350400 | -1.55416100 | 1     | 1.29868700  | -0.83303000 | 3.17501100  |
| 1 | 0.59773000  | -5.76977100 | 1.15845800  | 1 | -2.74322600 | -2.40268600 | -3.54880800 | 6     | 2.02264900  | 1.97126700  | -0.47298800 |
| 1 | -2.12769900 | -4.14468800 | 4.07207900  | 1 | -4.09296500 | -1.74116000 | -2.65072700 | 1     | 2.30509600  | 1.22537800  | -1.24683900 |
| 1 | -1.30505700 | -6.08795700 | 2.73694800  | 1 | -3.07721800 | -3.56662400 | 0.58759500  | 8     | 1.19504900  | 1.39365700  | 0.51510100  |
| 6 | 1.78541700  | -1.29343100 | -0.18938400 | 1 | -4.32249500 | -2.49910500 | -0.03230700 | 6     | 3.26116600  | 2.53438900  | 0.16083900  |
| 6 | 2.88333700  | -1.65551700 | -1.11932000 | 1 | -3.62571800 | -4.05651300 | -1.84585700 | 6     | 3.14232300  | 3.55412300  | 1.11482000  |
| 6 | 2.70657700  | -1.45533300 | -2.49821400 | 1 | -1.93205400 | -3.64678500 | -1.57993500 | 6     | 4.53031700  | 2.04233700  | -0.15905600 |
| 6 | 4.09788700  | -2.19372300 | -0.66600000 | 7 | -2.34008900 | -0.45359900 | -0.72455000 | 6     | 4.27845800  | 4.07632700  | 1.72651000  |
| 6 | 3.72467100  | -1.75838900 | -3.39472600 | 7 | -1.81680900 | 2.15229700  | -0.01349900 | 1     | 2.14310300  | 3.92641600  | 1.35599300  |
| 1 | 1.75898700  | -1.03745200 | -2.84543700 | 8 | -0.23815100 | 3.79507900  | 0.29517300  | 6     | 5.66932100  | 2.56895900  | 0.45198300  |
| 6 | 5.11517200  | -2.50186000 | -1.56510800 | 6 | -1.41637800 | 3.46279000  | 0.24354600  | 1     | 4.62495300  | 1.23823000  | -0.89772200 |
| 1 | 4.24354400  | -2.38643300 | 0.39937900  | 6 | -2.50247600 | 4.42285300  | 0.44234100  | 6     | 5.54446400  | 3.58612200  | 1.39654500  |
| 6 | 4.93399900  | -2.27991900 | -2.93024000 | 1 | -2.18580600 | 5.43672800  | 0.69348200  | 1     | 4.17974000  | 4.87563400  | 2.46546800  |
| 1 | 3.57965900  | -1.58414000 | -4.46334500 | 6 | -3.80842000 | 4.09277700  | 0.29717000  | 1     | 6.65709100  | 2.18011600  | 0.19186600  |
| 1 | 6.05455400  | -2.92175100 | -1.19871300 | 1 | -4.59631200 | 4.83946100  | 0.43567300  | 1     | 6.43468500  | 3.99867300  | 1.87791100  |
| 1 | 5.73457800  | -2.51805500 | -3.63440500 | 6 | -4.18222500 | 2.75777100  | -0.05283600 | 1     | 1.44301900  | 2.76934300  | -0.96530000 |
| 8 | 0.62398300  | -1.13145500 | -0.69192600 | 6 | -3.12708100 | 1.80874300  | -0.20247800 |       |             |             |             |
| 1 | 3.05567100  | -1.14076100 | 1.52840100  | 6 | -3.45797900 | 0.47958100  | -0.56358500 |       |             |             |             |
| 6 | -2.14434800 | -0.93403600 | -2.12755500 | 6 | -4.78672600 | 0.11750200  | -0.75646600 | B-TS9 |             |             |             |
| 6 | -2.35988100 | -1.59924500 | 0.24248500  | 1 | -5.04255200 | -0.90228000 | -1.03640600 | 1     | -2.03068100 | 0.68433900  | 0.26654700  |
| 6 | -3.05071700 | -2.08087000 | -2.54214400 | 6 | -5.81911200 | 1.05202000  | -0.59707400 | 6     | -2.65474500 | 0.16421200  | -0.77945200 |
| 1 | -1.09775700 | -1.27099300 | -2.18680600 | 1 | -6.85459600 | 0.74425500  | -0.75078500 | 6     | -1.90142600 | 0.89391400  | -1.88459900 |

|   |             |             |             |   |            |             |             |    |             |             |             |
|---|-------------|-------------|-------------|---|------------|-------------|-------------|----|-------------|-------------|-------------|
| 6 | -2.17606000 | 2.37279700  | -1.90944600 | 6 | 1.68240900 | -1.39960000 | -2.06793500 | 1  | 4.45133900  | -2.59038300 | -0.93926400 |
| 6 | -3.22685200 | 2.88727800  | -2.67957400 | 6 | 2.22290600 | -3.98549400 | -0.83080900 | 6  | 5.71330400  | -1.01303300 | -0.21150200 |
| 6 | -1.41304200 | 3.25787700  | -1.13545500 | 1 | 0.58102600 | -2.88483500 | -0.01111600 | 1  | 6.63044100  | -1.57070700 | -0.40746500 |
| 6 | -3.51423200 | 4.25196700  | -2.67934800 | 1 | 2.03578500 | -2.80605400 | 1.00047900  | 6  | 5.76101900  | 0.26975600  | 0.30479900  |
| 1 | -3.82635600 | 2.20604300  | -3.29300500 | 6 | 2.32135900 | -2.52308100 | -2.86135200 | 1  | 6.72032700  | 0.74754100  | 0.52078200  |
| 6 | -1.70093700 | 4.62167000  | -1.13506100 | 1 | 0.58666100 | -1.46454300 | -2.16765200 | 46 | 0.50904600  | -0.13144900 | 0.24543700  |
| 1 | -0.59669200 | 2.88087300  | -0.51133400 | 1 | 1.98858300 | -0.40571000 | -2.42349600 | 1  | -2.17259500 | 0.45135800  | -2.86019800 |
| 6 | -2.75084100 | 5.12443600  | -1.90411600 | 6 | 1.88829600 | -3.87208000 | -2.30991200 | 1  | -0.81756100 | 0.71991100  | -1.76286700 |
| 1 | -4.33595500 | 4.63547300  | -3.28972000 | 1 | 1.77993900 | -4.89809000 | -0.40339900 | 6  | -1.33581500 | 1.11956600  | 2.39936600  |
| 1 | -1.09170500 | 5.29270700  | -0.52345000 | 1 | 3.30772300 | -4.10252500 | -0.68834200 | 8  | -1.01221700 | 1.01758000  | 1.00915200  |
| 1 | -2.97281000 | 6.19462700  | -1.90306500 | 1 | 2.01947800 | -2.41298600 | -3.91373500 | 6  | -2.34023400 | 0.02662400  | 2.76182600  |
| 6 | -2.27545300 | -1.15183000 | -0.39683100 | 1 | 3.41936400 | -2.42695600 | -2.85641400 | 1  | -1.91638700 | -0.97115400 | 2.56733800  |
| 6 | -3.26751900 | -2.12849700 | 0.11828200  | 1 | 2.34484700 | -4.69753300 | -2.87594600 | 1  | -2.61184200 | 0.07255100  | 3.82669900  |
| 6 | -2.82740600 | -3.20287500 | 0.90887000  | 1 | 0.79684100 | -3.97669900 | -2.44309300 | 1  | -3.27108600 | 0.11916600  | 2.18143900  |
| 6 | -4.63654000 | -2.02728200 | -0.17431900 | 7 | 1.96639900 | -1.44816400 | -0.59846200 | 6  | -1.93060700 | 2.50805700  | 2.59501000  |
| 6 | -3.72916200 | -4.13685700 | 1.40559700  | 7 | 2.13783100 | 1.02917700  | 0.58626100  | 1  | -2.22632700 | 2.67433100  | 3.64177400  |
| 1 | -1.76159900 | -3.27989300 | 1.13434800  | 8 | 1.06207800 | 3.00737900  | 1.07070200  | 1  | -1.19397300 | 3.26825700  | 2.30390400  |
| 6 | -5.53933200 | -2.96427100 | 0.32064600  | 6 | 2.10562600 | 2.37046600  | 0.96418100  | 1  | -2.82211100 | 2.63881900  | 1.96373000  |
| 1 | -4.99757300 | -1.21767400 | -0.81184800 | 6 | 3.40469800 | 2.97830200  | 1.25135000  | 6  | -0.07937200 | 0.94963100  | 3.23962400  |
| 6 | -5.08938900 | -4.01953300 | 1.11404500  | 1 | 3.36431100 | 4.00812000  | 1.61046400  | 1  | 0.64212300  | 1.74650700  | 3.02855700  |
| 1 | -3.37308900 | -4.96141700 | 2.02754000  | 6 | 4.57688700 | 2.32482800  | 1.06815100  | 1  | -0.33129500 | 0.98355500  | 4.30980800  |
| 1 | -6.60112400 | -2.87374500 | 0.08095200  | 1 | 5.53336000 | 2.80959700  | 1.28621600  | 1  | 0.39895100  | -0.02275500 | 3.03980200  |
| 1 | -5.79905500 | -4.75347300 | 1.50300300  | 6 | 4.58280400 | 0.98876900  | 0.56106300  | 8  | 1.17196100  | -2.05799100 | -0.80453300 |
| 8 | -1.04748100 | -1.49715500 | -0.33428800 | 6 | 3.31391000 | 0.38576200  | 0.30944500  | 1  | -0.04226800 | 0.31704700  | 1.21983100  |
| 1 | -3.72957500 | 0.37694100  | -0.76165900 | 6 | 3.28535000 | -0.91256100 | -0.25582100 | 1  | -1.35391500 | -2.11516400 | -0.20441700 |
| 6 | 1.67747400  | -2.80465700 | -0.03836400 | 6 | 4.47184700 | -1.59367100 | -0.50428700 | 1  | 0.33617300  | -2.53853000 | -0.77003000 |

|        |             |             |             |    |             |             |             |        |             |            |             |
|--------|-------------|-------------|-------------|----|-------------|-------------|-------------|--------|-------------|------------|-------------|
|        |             |             |             | 1  | 1.55508500  | 2.25763500  | 1.15600100  | 6      | -1.05206000 | 3.12843400 | -0.42945200 |
|        |             |             |             | 1  | 2.23289200  | 1.00605800  | 2.19314700  | 6      | -2.38753000 | 3.74511000 | -0.02497700 |
| B-TS10 |             |             |             | 6  | 4.05565500  | 2.90549700  | -0.09107700 | 1      | -2.34746700 | 4.10575200 | 1.01209200  |
| 7      | 0.76829100  | -1.67339200 | -0.29823000 | 1  | 4.17558800  | 2.25492700  | -2.16137800 | 1      | -2.65192700 | 4.59283100 | -0.67348900 |
| 8      | -1.22202200 | -2.52964500 | -1.04982700 | 1  | 4.76982800  | 1.06873500  | -1.01171800 | 1      | -3.19574000 | 3.00215800 | -0.09507500 |
| 6      | -0.05716100 | -2.71463100 | -0.71354700 | 1  | 3.59000600  | 3.14616700  | 2.01271100  | 8      | -0.79341100 | 2.07258200 | 0.50470900  |
| 6      | 0.55909100  | -4.04192100 | -0.70353900 | 1  | 4.53329600  | 1.72185400  | 1.65635700  | 6      | -1.13533900 | 2.58016400 | -1.85002400 |
| 1      | -0.09422300 | -4.86163600 | -1.00811400 | 1  | 5.04789600  | 3.37979600  | -0.06800700 | 1      | -1.36343600 | 3.37571200 | -2.57468900 |
| 6      | 1.84700100  | -4.25056500 | -0.33316400 | 1  | 3.34378600  | 3.71015100  | -0.34696700 | 1      | -0.18249100 | 2.11696600 | -2.15183400 |
| 1      | 2.27222700  | -5.25884500 | -0.32453600 | 7  | 2.23123700  | 0.57437100  | 0.13969800  | 1      | -1.91432500 | 1.80907700 | -1.93087000 |
| 6      | 2.67892500  | -3.15085300 | 0.04677200  | 46 | 0.12491200  | 0.21253600  | 0.00760900  | 6      | 0.06041000  | 4.15901500 | -0.30993000 |
| 6      | 2.08126300  | -1.85781900 | 0.02036800  | 6  | -2.59656300 | -0.70218700 | 0.99229100  | 1      | -0.13030600 | 5.03356000 | -0.94894100 |
| 6      | 4.01884900  | -3.28312700 | 0.44649400  | 6  | -4.06209500 | -0.75636000 | 0.67138500  | 1      | 0.15644000  | 4.50809200 | 0.72829200  |
| 1      | 4.45835400  | -4.28357200 | 0.48054800  | 6  | -5.01542600 | -0.12566000 | 1.47562400  | 1      | 1.02907500  | 3.73621300 | -0.61528700 |
| 6      | 4.76812200  | -2.17382900 | 0.79945600  | 6  | -4.48122900 | -1.42404800 | -0.48791300 |        |             |            |             |
| 1      | 5.80511900  | -2.28245000 | 1.12096200  | 6  | -6.36953300 | -0.16893400 | 1.13981500  |        |             |            |             |
| 6      | 4.19718000  | -0.89402400 | 0.72554300  | 1  | -4.69283200 | 0.40256300  | 2.37855200  | B-TS12 |             |            |             |
| 1      | 4.81139800  | -0.03139800 | 0.97580500  | 6  | -5.83095500 | -1.46462000 | -0.82492500 | 6      | -2.58723500 | 2.03824700 | 1.09295600  |
| 6      | 2.87463900  | -0.72830300 | 0.33411000  | 1  | -3.72576200 | -1.91106100 | -1.11065800 | 6      | -2.28218000 | 1.71401900 | -1.29700800 |
| 8      | -1.94816500 | 0.11340100  | 0.03144400  | 6  | -6.77879100 | -0.83790900 | -0.01200900 | 6      | -3.86945700 | 2.83182700 | 0.87438300  |
| 6      | 2.61751600  | 1.18079200  | -1.17205300 | 1  | -7.10640900 | 0.32375400  | 1.77913600  | 1      | -1.72949800 | 2.73660300 | 1.13636300  |
| 6      | 2.39692000  | 1.55516300  | 1.25587300  | 1  | -6.15062100 | -1.99168000 | -1.72748900 | 1      | -2.57367700 | 1.49496800 | 2.04744800  |
| 6      | 3.98729300  | 1.83022300  | -1.16402500 | 1  | -7.83823800 | -0.87252300 | -0.27796900 | 6      | -3.57143300 | 2.47229200 | -1.58760700 |
| 1      | 1.85482800  | 1.94275700  | -1.40091100 | 1  | -2.43520200 | -0.31394700 | 2.01616900  | 1      | -1.42143000 | 2.41090500 | -1.33741100 |
| 1      | 2.52548300  | 0.39423500  | -1.93366100 | 1  | -2.16479000 | -1.71319100 | 0.93698400  | 1      | -2.08864700 | 0.94644900 | -2.05692100 |
| 6      | 3.70423900  | 2.33688100  | 1.27541100  | 1  | -1.68393100 | 1.21815600  | 0.38491300  | 6      | -3.85678000 | 3.49381700 | -0.49648100 |

|   |             |             |             |    |             |             |             |       |             |             |             |
|---|-------------|-------------|-------------|----|-------------|-------------|-------------|-------|-------------|-------------|-------------|
| 1 | -3.98874300 | 3.58077900  | 1.67296500  | 1  | 1.21745300  | -0.47002300 | -2.37188900 | 6     | 0.58008700  | -0.76470100 | 2.37047700  |
| 1 | -4.74275900 | 2.16017100  | 0.94830100  | 1  | 1.61691200  | 1.67173300  | 0.39962900  | 8     | -0.19269000 | 0.10479500  | 1.59164400  |
| 1 | -3.50365400 | 2.95647000  | -2.57450100 | 6  | 3.62974400  | 0.97062200  | -0.51918900 |       |             |             |             |
| 1 | -4.40480900 | 1.74995900  | -1.65119900 | 6  | 3.85597700  | -0.37522200 | -0.83102300 |       |             |             |             |
| 1 | -4.80439300 | 4.02073100  | -0.68778400 | 6  | 4.59516600  | 1.67653800  | 0.20611200  | A-IM0 |             |             |             |
| 1 | -3.06941400 | 4.26964100  | -0.51591500 | 6  | 5.02651300  | -1.00084200 | -0.41505600 | 6     | 4.12511600  | 0.72871500  | 0.09062100  |
| 7 | -2.31459100 | 1.09523000  | 0.02401200  | 1  | 3.10294400  | -0.93751300 | -1.38939600 | 6     | 2.75090100  | 0.53335700  | 0.01607400  |
| 7 | -0.75944800 | -0.89416300 | -1.14924700 | 6  | 5.76683900  | 1.04922900  | 0.62316900  | 6     | 1.88918800  | 1.65535900  | -0.04634000 |
| 8 | 1.00184800  | -1.42276500 | -2.52988500 | 1  | 4.41940100  | 2.72880000  | 0.45134300  | 6     | 2.45150800  | 2.96478300  | -0.02320500 |
| 6 | -0.12180100 | -1.76775600 | -1.91201100 | 6  | 5.98323700  | -0.29288000 | 0.31572500  | 6     | 3.84596000  | 3.12259800  | 0.05342800  |
| 6 | -0.57759000 | -3.10217500 | -2.07511000 | 1  | 5.19336100  | -2.05266300 | -0.65849000 | 6     | 4.67567000  | 2.01926200  | 0.10798500  |
| 1 | -0.01461500 | -3.77252900 | -2.72455400 | 1  | 6.51299500  | 1.60974200  | 1.19092200  | 1     | 4.79945000  | -0.12213200 | 0.13718100  |
| 6 | -1.66812200 | -3.50769400 | -1.35404400 | 1  | 6.89860400  | -0.78988900 | 0.64507400  | 6     | 1.54183600  | 4.06337200  | -0.07865700 |
| 1 | -2.00630700 | -4.54626700 | -1.40429000 | 46 | 0.54679200  | 0.61882700  | -0.19647800 | 1     | 4.25944600  | 4.13417900  | 0.06888000  |
| 6 | -2.38256500 | -2.59127300 | -0.53584200 | 6  | -0.30724600 | -1.10835100 | 3.56838800  | 1     | 5.75859900  | 2.13943000  | 0.16607100  |
| 6 | -1.93037200 | -1.24107400 | -0.53246500 | 1  | -1.24067800 | -1.57770800 | 3.22451600  | 6     | 0.20413700  | 3.84496400  | -0.15304300 |
| 6 | -2.67676900 | -0.23542900 | 0.16398600  | 1  | 0.19529700  | -1.80065200 | 4.26071600  | 6     | -0.34863300 | 2.50416300  | -0.18433000 |
| 6 | -3.71491600 | -0.66651700 | 0.98941800  | 1  | -0.57195400 | -0.19626300 | 4.12192400  | 1     | 1.94342000  | 5.08049600  | -0.06105000 |
| 1 | -4.27153300 | 0.07130000  | 1.57064300  | 6  | 0.92046400  | -2.04473400 | 1.60119600  | 1     | -0.51922900 | 4.66017200  | -0.19895500 |
| 6 | -4.09808600 | -2.01645500 | 1.05631500  | 1  | 1.54262100  | -1.80964300 | 0.71985500  | 8     | -1.58263300 | 2.32349700  | -0.26543000 |
| 1 | -4.93200200 | -2.29844200 | 1.70327500  | 1  | 1.48130300  | -2.76594100 | 2.21630700  | 6     | 2.36688300  | -1.56798600 | 1.27237700  |
| 6 | -3.47926300 | -2.96815900 | 0.27257900  | 1  | 0.00096100  | -2.53882000 | 1.24937100  | 6     | 2.49517100  | -1.60902800 | -1.20893200 |
| 1 | -3.81482500 | -4.00756900 | 0.26908200  | 6  | 1.86947200  | -0.09518700 | 2.84994600  | 6     | 3.71407800  | -2.26281400 | 1.36354100  |
| 6 | 2.36676900  | 1.66741000  | -0.91272700 | 1  | 1.64297600  | 0.85457300  | 3.35645000  | 1     | 1.57181100  | -2.32677300 | 1.30711200  |
| 1 | 2.44359100  | 2.77126000  | -0.80374400 | 1  | 2.43403800  | -0.73225900 | 3.54840000  | 1     | 2.19822000  | -0.87064000 | 2.10457200  |
| 8 | 1.62617400  | 1.24940800  | -1.90402900 | 1  | 2.53695400  | 0.12379000  | 1.99975400  | 6     | 3.84448800  | -2.30180900 | -1.13860800 |

|    |             |             |             |       |             |             |             |    |             |             |             |
|----|-------------|-------------|-------------|-------|-------------|-------------|-------------|----|-------------|-------------|-------------|
| 1  | 1.70871000  | -2.37204100 | -1.29965900 | 1     | -2.62526500 | -1.54737600 | 1.04098000  | 6  | 0.06812300  | 1.36406700  | -1.52415100 |
| 1  | 2.41111600  | -0.94111900 | -2.07721800 | 8     | -2.02134300 | -0.16246900 | -0.32600800 | 6  | 0.26834200  | 3.93793600  | -0.18350700 |
| 6  | 3.96769100  | -3.12283800 | 0.13539100  | 1     | -1.99718100 | 0.85555800  | -0.39639900 | 1  | 1.24506100  | 2.24831200  | 0.73882400  |
| 1  | 3.69900000  | -2.88179000 | 2.27346700  |       |             |             |             | 1  | -0.24742200 | 2.69393600  | 1.55413400  |
| 1  | 4.53353900  | -1.54370000 | 1.51885000  |       |             |             |             | 6  | 0.05673000  | 2.65840400  | -2.32541300 |
| 1  | 3.92429600  | -2.94831100 | -2.02564900 | A-IM1 |             |             |             | 1  | 1.10949600  | 0.99852300  | -1.42820300 |
| 1  | 4.67553300  | -1.58488400 | -1.22950500 | 7     | -1.45254200 | -1.06826000 | -0.38566500 | 1  | -0.48578400 | 0.56215800  | -2.02928800 |
| 1  | 4.95167200  | -3.61102700 | 0.19451900  | 8     | -1.05732600 | -3.22252100 | -1.07512000 | 6  | 0.82406100  | 3.74548900  | -1.58731900 |
| 1  | 3.22061700  | -3.93536200 | 0.10899000  | 6     | -1.90042700 | -2.26687000 | -0.75444400 | 1  | 0.87679800  | 4.65659600  | 0.38752500  |
| 7  | 2.12902100  | -0.79678000 | 0.00315800  | 6     | -3.29215400 | -2.55476400 | -0.77841400 | 1  | -0.74278000 | 4.37626600  | -0.24864400 |
| 46 | 0.02421400  | -0.51462800 | -0.12585600 | 1     | -3.60661600 | -3.55325100 | -1.08193600 | 1  | 0.48518700  | 2.47968500  | -3.32391000 |
| 17 | -0.47896900 | -2.82245000 | -0.06772500 | 6     | -4.17053500 | -1.58950200 | -0.37177200 | 1  | -0.98835800 | 2.97794300  | -2.48689700 |
| 7  | 0.53751000  | 1.45747500  | -0.12498300 | 1     | -5.24165500 | -1.80283200 | -0.32360200 | 1  | 0.80959100  | 4.69249900  | -2.14849800 |
| 6  | -6.25970200 | 1.11611600  | 0.41436700  | 6     | -3.71586700 | -0.28799500 | -0.02607500 | 1  | 1.88731200  | 3.44838700  | -1.51819200 |
| 6  | -6.95705700 | 0.11898600  | -0.26645900 | 6     | -2.31689600 | -0.03819500 | -0.12632500 | 7  | -0.47461400 | 1.56423700  | -0.18091300 |
| 6  | -6.31844000 | -1.07881100 | -0.59137400 | 6     | -4.58608600 | 0.73556600  | 0.40940500  | 46 | 0.52531900  | -1.03345400 | 0.41047500  |
| 6  | -4.98828900 | -1.27902000 | -0.23197400 | 1     | -5.65591600 | 0.52830600  | 0.48296200  | 17 | -0.16792400 | -0.26585300 | 2.51375300  |
| 6  | -4.28250300 | -0.28755800 | 0.46099200  | 6     | -4.07137200 | 1.97312900  | 0.73457300  | 1  | 2.93038500  | -2.27120400 | -2.29219300 |
| 6  | -4.92788500 | 0.91414300  | 0.77285100  | 1     | -4.73120200 | 2.76603500  | 1.09292100  | 1  | 2.62465100  | -3.21302500 | -0.81838000 |
| 1  | -6.75500500 | 2.05688400  | 0.66574200  | 6     | -2.70820900 | 2.25030700  | 0.54731400  | 6  | 3.20060700  | -1.17724300 | -0.45131200 |
| 1  | -8.00144600 | 0.27565500  | -0.54676700 | 1     | -2.34229800 | 3.25975600  | 0.74333600  | 6  | 2.74854300  | -0.99506400 | 0.87727500  |
| 1  | -6.86186200 | -1.86055500 | -1.12730300 | 6     | -1.81580600 | 1.29123500  | 0.06853800  | 6  | 4.13674400  | -0.27879000 | -0.96113800 |
| 1  | -4.47927500 | -2.21256600 | -0.48871600 | 8     | 1.14722700  | -1.83738300 | -1.37883300 | 6  | 3.20219700  | 0.07747400  | 1.65929400  |
| 1  | -4.37404900 | 1.69984800  | 1.29524300  | 1     | -0.13617700 | -2.82997400 | -1.21428500 | 1  | 2.17089500  | -1.81466700 | 1.36843200  |
| 6  | -2.84053200 | -0.49681500 | 0.80594000  | 6     | 2.48881600  | -2.20924700 | -1.28012900 | 6  | 4.61816600  | 0.76593900  | -0.16851500 |
| 1  | -2.54491800 | 0.12269300  | 1.67071000  | 6     | 0.21185900  | 2.60835700  | 0.55984800  | 1  | 4.48116900  | -0.38723500 | -1.99304800 |

|       |             |             |             |   |             |             |             |       |             |             |             |
|-------|-------------|-------------|-------------|---|-------------|-------------|-------------|-------|-------------|-------------|-------------|
| 6     | 4.14527900  | 0.95462600  | 1.13300300  | 6 | 2.15174200  | -1.48654400 | 2.38128600  | 1     | 3.12710600  | -2.99910100 | -0.88129200 |
| 1     | 2.79469300  | 0.21379500  | 2.66303700  | 1 | 3.04452700  | -1.50648300 | 3.00679500  | 1     | 4.45056200  | 1.10041800  | -0.59862800 |
| 1     | 5.35853700  | 1.45685500  | -0.57968700 | 6 | 1.51793100  | -2.62045300 | 1.96101800  | 1     | 4.79675700  | -1.32023800 | -0.12009400 |
| 1     | 4.51265400  | 1.78975800  | 1.73318500  | 1 | 1.89777000  | -3.60617000 | 2.24270300  | 46    | -0.21754300 | 1.64517400  | 0.07501800  |
|       |             |             |             | 6 | 0.37924100  | -2.53560600 | 1.11364100  | 17    | 1.47222000  | 3.22144700  | 0.52096700  |
|       |             |             |             | 6 | -0.11232200 | -1.23202900 | 0.82514800  |       |             |             |             |
| A-IM2 |             |             |             | 6 | -1.29615600 | -1.08405600 | 0.04102100  |       |             |             |             |
| 6     | -2.54397100 | 0.57569400  | 1.29912000  | 6 | -1.80036300 | -2.19807400 | -0.60792500 | A-IM3 |             |             |             |
| 6     | -2.84709700 | 0.49276900  | -1.13147100 | 1 | -2.63311800 | -2.09537900 | -1.30026000 | 6     | 0.25491300  | 2.80400700  | -0.00043900 |
| 6     | -3.87235900 | -0.12522200 | 1.50182600  | 6 | -1.25482300 | -3.47857300 | -0.39164100 | 6     | 0.24750600  | 1.41474200  | -0.00027900 |
| 1     | -2.69088500 | 1.66747800  | 1.29823000  | 1 | -1.68475200 | -4.33282500 | -0.91778500 | 6     | 1.49836600  | 0.73490300  | -0.00016000 |
| 1     | -1.82632100 | 0.35322500  | 2.09946100  | 6 | -0.21892600 | -3.65765000 | 0.49928600  | 6     | 2.71447500  | 1.48024000  | -0.00007800 |
| 6     | -4.25525400 | -0.06655400 | -0.95282700 | 1 | 0.17922600  | -4.65376900 | 0.70752200  | 6     | 2.66695500  | 2.89050200  | -0.00021900 |
| 1     | -2.91418700 | 1.58794900  | -1.20039400 | 6 | 0.41494500  | 0.28709800  | -2.73519400 | 6     | 1.45321500  | 3.54089000  | -0.00043100 |
| 1     | -2.37361000 | 0.14795500  | -2.06053400 | 1 | 0.36624500  | 1.39356300  | -2.91528900 | 1     | -0.68827200 | 3.34627200  | -0.00058700 |
| 6     | -4.84429900 | 0.27437300  | 0.40549000  | 8 | -0.48618100 | -0.44928700 | -3.08875400 | 6     | 3.93566100  | 0.75383500  | 0.00016600  |
| 1     | -4.25854200 | 0.13530700  | 2.49859900  | 1 | 2.05335500  | 1.64957300  | 1.76722100  | 1     | 3.60535800  | 3.44994900  | -0.00016300 |
| 1     | -3.72407100 | -1.21978900 | 1.50680400  | 1 | -0.85039900 | 2.74155600  | -0.80069600 | 1     | 1.41045600  | 4.63152300  | -0.00055900 |
| 1     | -4.87436600 | 0.34336900  | -1.76526500 | 6 | 1.64188500  | -0.16624200 | -2.05872600 | 6     | 3.92780700  | -0.61281200 | 0.00031600  |
| 1     | -4.28370200 | -1.15784900 | -1.09033200 | 6 | 1.83896300  | -1.52862300 | -1.79065400 | 6     | 2.68073700  | -1.29007300 | 0.00018900  |
| 1     | -5.82206700 | -0.21182000 | 0.53876300  | 6 | 2.59508900  | 0.77403800  | -1.64580400 | 1     | 4.87985300  | 1.30347600  | 0.00024200  |
| 1     | -5.03174800 | 1.36100800  | 0.47035500  | 6 | 2.97421400  | -1.93923400 | -1.10251100 | 1     | 4.83948700  | -1.20966300 | 0.00051300  |
| 7     | -1.89094500 | 0.23472100  | -0.01342300 | 1 | 1.07587200  | -2.24089800 | -2.11803100 | 8     | 2.68469200  | -2.60519400 | 0.00029000  |
| 7     | 0.55843400  | -0.10734100 | 1.22016800  | 6 | 3.72592600  | 0.36179700  | -0.94805500 | 6     | -1.79270600 | 0.75975100  | -1.23007500 |
| 8     | 2.38429200  | 0.83775600  | 2.24049500  | 1 | 2.42142200  | 1.83584800  | -1.83962400 | 6     | -1.79223600 | 0.75949500  | 1.23022600  |
| 6     | 1.67167100  | -0.22151900 | 1.93006600  | 6 | 3.91344100  | -0.99454700 | -0.67586400 | 6     | -2.70908100 | 1.97151300  | -1.25448300 |



|       |             |             |             |   |             |             |             |   |             |             |             |
|-------|-------------|-------------|-------------|---|-------------|-------------|-------------|---|-------------|-------------|-------------|
| 1     | -2.40579100 | -0.15593700 | -1.27552700 | 6 | 0.41347500  | -2.47245900 | 0.69649200  | 6 | -3.88239000 | 3.12488000  | 1.26238300  |
| 1     | -1.11269600 | 0.73366100  | -2.09384300 | 6 | 0.17326200  | -1.14350100 | 3.13064200  | 1 | -1.75151000 | 3.00179200  | 0.93460300  |
| 6     | -2.70853100 | 1.97127500  | 1.25534400  | 1 | 1.13589500  | 0.52298300  | 2.15280000  | 1 | -2.33579300 | 1.79684600  | 2.07181800  |
| 1     | -2.40531000 | -0.15621500 | 1.27568000  | 6 | -0.19931400 | -3.10383200 | 1.77404200  | 6 | -4.35654000 | 2.62177400  | -1.13327000 |
| 1     | -1.11185300 | 0.73313200  | 2.09370200  | 1 | 0.53302400  | -2.99997200 | -0.25525000 | 1 | -2.23286400 | 2.65435900  | -1.52296500 |
| 6     | -3.56788100 | 2.02330800  | 0.00062600  | 6 | -0.33301900 | -2.43886900 | 2.99428200  | 1 | -3.00851700 | 1.14165100  | -2.00562700 |
| 1     | -3.34094900 | 1.90177800  | -2.15315500 | 1 | 0.08243300  | -0.61961300 | 4.08549300  | 6 | -4.30158400 | 3.71273500  | -0.07606400 |
| 1     | -2.13667000 | 2.90623200  | -1.37602100 | 1 | -0.57227400 | -4.12590900 | 1.66401400  | 1 | -3.72283700 | 3.91932100  | 2.00737600  |
| 1     | -3.34002800 | 1.90130300  | 2.15425800  | 1 | -0.82065600 | -2.93113600 | 3.83897300  | 1 | -4.70812100 | 2.50960800  | 1.65643800  |
| 1     | -2.13599700 | 2.90592600  | 1.37687500  | 6 | 3.90426100  | -0.62239200 | -0.26278900 | 1 | -4.62843900 | 3.03206400  | -2.11779100 |
| 1     | -4.21238600 | 2.91517900  | 0.00082700  | 6 | 5.25394700  | -0.00041400 | -0.09724300 | 1 | -5.13831000 | 1.88283200  | -0.88044200 |
| 1     | -4.24756400 | 1.15301300  | 0.00070000  | 6 | 6.37420200  | -0.84412300 | -0.08618300 | 1 | -5.26770700 | 4.23204400  | 0.01176900  |
| 7     | -0.96204100 | 0.62058500  | -0.00011100 | 6 | 5.44018700  | 1.38300100  | 0.04353600  | 1 | -3.56902400 | 4.47803700  | -0.38819200 |
| 46    | -0.30781500 | -1.57606800 | -0.00005400 | 6 | 7.65263200  | -0.31993300 | 0.06290600  | 7 | -2.57735100 | 1.32475500  | 0.04959400  |
| 7     | 1.52027800  | -0.63952800 | -0.00006100 | 1 | 6.20522200  | -1.91756800 | -0.19753300 | 7 | -1.60627900 | -0.87883000 | -1.27930900 |
| 17    | -2.44538500 | -2.47849700 | -0.00035700 | 6 | 6.72233000  | 1.90774000  | 0.19110100  | 8 | -0.22685900 | -1.61125800 | -2.94030100 |
| 1     | 0.15870700  | -3.06122900 | 0.00010400  | 1 | 4.58235500  | 2.05994600  | 0.03811300  | 6 | -1.24882100 | -1.83184300 | -2.12006700 |
| 1     | 1.73428400  | -2.90010600 | 0.00019100  | 6 | 7.82870400  | 1.05873200  | 0.20159000  | 6 | -1.89358000 | -3.09314800 | -2.16162500 |
|       |             |             |             | 1 | 8.51940000  | -0.98506300 | 0.07175800  | 1 | -1.55566500 | -3.83536300 | -2.88471200 |
|       |             |             |             | 1 | 6.85875300  | 2.98604900  | 0.29948300  | 6 | -2.88009000 | -3.34455100 | -1.24440900 |
| A-IM4 |             |             |             | 1 | 8.83310400  | 1.47292300  | 0.31876000  | 1 | -3.35709100 | -4.32706000 | -1.20400200 |
| 1     | 0.10781100  | -0.71242700 | -2.74361900 | 8 | 3.78477900  | -1.82629200 | -0.40306900 | 6 | -3.30550200 | -2.33429400 | -0.33951800 |
| 6     | 2.70646800  | 0.30399800  | -0.25777000 | 1 | 2.83069400  | 1.03783400  | -1.07085200 | 6 | -2.68043800 | -1.06190300 | -0.45214800 |
| 6     | 1.40570400  | -0.44055600 | -0.39006100 | 1 | 2.73107700  | 0.92437800  | 0.65096900  | 6 | -3.13469600 | 0.04290200  | 0.33018300  |
| 6     | 0.89381900  | -1.15345400 | 0.80327300  | 6 | -2.59342500 | 2.31965600  | 1.13874300  | 6 | -4.05826700 | -0.21710700 | 1.33281100  |
| 6     | 0.78296800  | -0.50853900 | 2.05381600  | 6 | -3.01130100 | 1.92598400  | -1.23657500 | 1 | -4.38617300 | 0.58887300  | 1.98852300  |

|       |             |             |             |   |             |             |             |       |             |             |             |
|-------|-------------|-------------|-------------|---|-------------|-------------|-------------|-------|-------------|-------------|-------------|
| 6     | -4.60780000 | -1.50238500 | 1.51244100  | 6 | 6.58185600  | -0.71974200 | 0.40476300  | 1     | -3.85054400 | 4.90334400  | 1.13806800  |
| 1     | -5.33404100 | -1.65884000 | 2.31248500  | 6 | 5.51562600  | 1.33039800  | -0.30873900 | 1     | -2.24294200 | 4.68821400  | 0.44826100  |
| 6     | -4.27760400 | -2.53815700 | 0.66645200  | 6 | 7.77886900  | -0.03712700 | 0.58499300  | 7     | -2.36752300 | 1.38768500  | 0.00077000  |
| 1     | -4.74042500 | -3.52204000 | 0.77060200  | 1 | 6.49791700  | -1.79031700 | 0.60458900  | 7     | -1.88232600 | -1.14402100 | -0.88245500 |
| 46    | -0.32263200 | 0.69872600  | -0.53582600 | 6 | 6.71627400  | 2.01365400  | -0.12908400 | 8     | -0.47045400 | -2.42901300 | -2.12700700 |
| 17    | 0.71690900  | 2.71650200  | 0.09558500  | 1 | 4.63664800  | 1.87804800  | -0.65737400 | 6     | -1.52666300 | -2.32845900 | -1.50596400 |
| 1     | 1.45978300  | -1.12920900 | -1.24682500 | 6 | 7.84796000  | 1.33206800  | 0.31770400  | 6     | -2.48501000 | -3.41938100 | -1.35137900 |
|       |             |             |             | 1 | 8.66554200  | -0.57071000 | 0.93523500  | 1     | -2.19505900 | -4.37067400 | -1.80159800 |
|       |             |             |             | 1 | 6.76891100  | 3.08439400  | -0.33831300 | 6     | -3.66827400 | -3.26043600 | -0.70445400 |
| A-IM5 |             |             |             | 1 | 8.78852700  | 1.87003300  | 0.45869400  | 1     | -4.36909800 | -4.09527900 | -0.60983900 |
| 1     | 0.97362400  | -0.48503300 | -1.47283800 | 8 | 4.14843300  | -2.02611800 | 0.01276400  | 6     | -4.03239200 | -1.99422800 | -0.14638100 |
| 6     | 2.95848200  | -0.09529300 | -0.71980300 | 1 | 3.18604600  | 0.32978300  | -1.71174300 | 6     | -3.08157700 | -0.94187800 | -0.27565900 |
| 6     | 1.73677600  | -0.98326100 | -0.79166800 | 1 | 2.77702600  | 0.79225900  | -0.09445500 | 6     | -3.38537600 | 0.34360400  | 0.22076400  |
| 6     | 1.16030100  | -1.41416200 | 0.53380300  | 6 | -1.89460600 | 2.03895500  | 1.27241100  | 6     | -4.60413600 | 0.56762000  | 0.85072400  |
| 6     | 0.96429700  | -0.49773600 | 1.57868100  | 6 | -2.78231200 | 2.41226700  | -1.01670000 | 1     | -4.86182100 | 1.55114300  | 1.23519300  |
| 6     | 0.76436000  | -2.74164600 | 0.72780900  | 6 | -2.80441300 | 3.12855600  | 1.81784300  | 6     | -5.53320600 | -0.47399000 | 0.99859500  |
| 6     | 0.35202600  | -0.89270300 | 2.76727400  | 1 | -0.91995900 | 2.48535000  | 1.03067800  | 1     | -6.48116500 | -0.27584600 | 1.50114300  |
| 1     | 1.27080100  | 0.54616800  | 1.44921800  | 1 | -1.72144200 | 1.23098800  | 1.99704300  | 6     | -5.24991700 | -1.73535300 | 0.50282500  |
| 6     | 0.14492600  | -3.13565600 | 1.91234600  | 6 | -3.73949200 | 3.46201700  | -0.48351800 | 1     | -5.97277900 | -2.54851700 | 0.60813200  |
| 1     | 0.92429900  | -3.46259300 | -0.07705800 | 1 | -1.85261100 | 2.90081100  | -1.34472200 | 46    | -0.64819100 | 0.43156500  | -0.82164800 |
| 6     | -0.07158200 | -2.21175300 | 2.93390100  | 1 | -3.19390700 | 1.86294700  | -1.87427300 | 17    | 0.69267200  | 2.39247700  | -0.86989400 |
| 1     | 0.20512200  | -0.16417300 | 3.56933900  | 6 | -3.15776700 | 4.14536900  | 0.74387300  | 1     | 1.93885000  | -1.87536300 | -1.40088300 |
| 1     | -0.16835900 | -4.17489100 | 2.03927100  | 1 | -2.26195900 | 3.61181400  | 2.64459500  |       |             |             |             |
| 1     | -0.55702000 | -2.52064800 | 3.86261900  | 1 | -3.71181400 | 2.71006800  | 2.27833100  |       |             |             |             |
| 6     | 4.18037400  | -0.83255500 | -0.22312600 | 1 | -3.91290900 | 4.18931700  | -1.29082700 | A-IM6 |             |             |             |
| 6     | 5.43689900  | -0.04493200 | -0.04356800 | 1 | -4.72728200 | 3.02538300  | -0.26635200 | 6     | -2.99060700 | -2.22726400 | 0.74002800  |

|   |             |             |             |   |             |             |             |       |             |             |             |
|---|-------------|-------------|-------------|---|-------------|-------------|-------------|-------|-------------|-------------|-------------|
| 1 | -3.97459900 | -2.43497900 | 1.16566800  | 1 | -2.25229100 | -3.92906100 | 1.77349200  | 6     | 2.70234400  | 0.78540800  | -0.23162100 |
| 6 | -1.88907600 | -3.19519500 | 1.03387600  | 6 | 1.29748200  | 2.63353100  | -1.02400600 | 6     | 3.99589300  | 1.19175100  | 0.06087500  |
| 6 | -0.59444900 | -2.61110200 | 1.54903300  | 6 | 1.54570900  | 2.23439700  | 1.41441100  | 1     | 4.16423000  | 2.15484600  | 0.53670100  |
| 6 | -0.57657400 | -1.43810100 | 2.31399700  | 6 | 2.17745500  | 3.86172300  | -0.91099300 | 6     | 5.10776800  | 0.38621300  | -0.23956400 |
| 6 | 0.62575700  | -3.25160000 | 1.29477200  | 1 | 0.24130100  | 2.92996700  | -0.92791900 | 1     | 6.10888800  | 0.74015000  | 0.01226600  |
| 6 | 0.62264900  | -0.92108700 | 2.80336500  | 1 | 1.40871500  | 2.12031700  | -1.98957200 | 6     | 4.92875400  | -0.83255300 | -0.85608600 |
| 1 | -1.51501100 | -0.90969900 | 2.50757700  | 6 | 2.28156600  | 3.56169300  | 1.56004700  | 1     | 5.78196400  | -1.46794400 | -1.10529000 |
| 6 | 1.82873000  | -2.72966500 | 1.76822500  | 1 | 0.48715100  | 2.39157000  | 1.66608100  | 1     | -0.90169600 | -1.96724100 | -1.38011700 |
| 1 | 0.63109800  | -4.16591700 | 0.69188500  | 1 | 1.93644900  | 1.47450400  | 2.10410600  | 1     | -1.65861200 | -3.80644000 | 0.14167600  |
| 6 | 1.83285400  | -1.55681300 | 2.52478200  | 6 | 1.95616700  | 4.52985800  | 0.43549700  | 46    | -0.21876200 | 0.33844300  | -0.23330500 |
| 1 | 0.60235500  | -0.00584400 | 3.40115000  | 1 | 1.92375400  | 4.54033400  | -1.73912600 | 17    | -1.68482000 | 1.89253300  | 0.74003100  |
| 1 | 2.76968000  | -3.23987800 | 1.54243500  | 1 | 3.24081500  | 3.60081700  | -1.05261700 |       |             |             |             |
| 1 | 2.77611000  | -1.14221700 | 2.89290100  | 1 | 1.98580500  | 3.98419300  | 2.53249700  |       |             |             |             |
| 6 | -2.87401700 | -1.14644300 | -0.08070800 | 1 | 3.37275200  | 3.42852800  | 1.63211900  | A-IM7 |             |             |             |
| 6 | -3.99795600 | -0.21896800 | -0.33998900 | 1 | 2.55329100  | 5.44879100  | 0.53055700  | 6     | -3.00065700 | -2.24939000 | 0.65976700  |
| 6 | -4.01293400 | 0.53656100  | -1.52136100 | 1 | 0.89871300  | 4.83780800  | 0.51018000  | 1     | -3.97788700 | -2.46045700 | 1.09890400  |
| 6 | -5.06116700 | -0.06509400 | 0.56226100  | 7 | 1.53535800  | 1.60983000  | 0.05034800  | 6     | -1.88396300 | -3.20071700 | 0.95285900  |
| 6 | -5.06539400 | 1.40267100  | -1.80049100 | 7 | 1.22005300  | -0.92483000 | -1.05682100 | 6     | -0.62576600 | -2.59189100 | 1.52949600  |
| 1 | -3.17443700 | 0.43808100  | -2.21337100 | 8 | -0.18607500 | -2.59019700 | -1.79111300 | 6     | -0.65846700 | -1.41306000 | 2.28390800  |
| 6 | -6.11288300 | 0.80233000  | 0.28460400  | 6 | 1.01332500  | -2.12706300 | -1.60437100 | 6     | 0.61227900  | -3.21844600 | 1.33353100  |
| 1 | -5.04803500 | -0.60777000 | 1.51064400  | 6 | 2.10500200  | -2.95794200 | -2.00076700 | 6     | 0.51189700  | -0.87492000 | 2.82050500  |
| 6 | -6.12203500 | 1.53916900  | -0.90028100 | 1 | 1.86276600  | -3.91760600 | -2.45782500 | 1     | -1.61030000 | -0.89526700 | 2.43672000  |
| 1 | -5.05936000 | 1.98216600  | -2.72721100 | 6 | 3.38378700  | -2.54654700 | -1.77617700 | 6     | 1.78499900  | -2.67609200 | 1.85385700  |
| 1 | -6.92593900 | 0.91617400  | 1.00596700  | 1 | 4.23182200  | -3.17788000 | -2.05286400 | 1     | 0.65634500  | -4.13166800 | 0.73161700  |
| 1 | -6.94503000 | 2.22499800  | -1.11551600 | 6 | 3.63039300  | -1.28716900 | -1.16402900 | 6     | 1.74005100  | -1.49736700 | 2.60050700  |
| 8 | -1.75623000 | -0.93318700 | -0.78049900 | 6 | 2.50027300  | -0.48438500 | -0.83312300 | 1     | 0.45353200  | 0.04606200  | 3.40685700  |

|   |             |             |             |    |             |             |             |       |             |             |             |
|---|-------------|-------------|-------------|----|-------------|-------------|-------------|-------|-------------|-------------|-------------|
| 1 | 2.74218500  | -3.17115200 | 1.66765900  | 1  | 3.32610100  | 3.56460100  | -1.03390800 |       |             |             |             |
| 1 | 2.66111400  | -1.06726900 | 3.00475300  | 1  | 2.05102200  | 3.91068400  | 2.55404300  |       |             |             |             |
| 6 | -2.92878000 | -1.15380900 | -0.12875700 | 1  | 3.42872000  | 3.32839300  | 1.65611700  | A-IM8 |             |             |             |
| 6 | -4.03573600 | -0.21052900 | -0.34873200 | 1  | 2.67133300  | 5.39248000  | 0.58132700  | 6     | 0.32401500  | 2.77966800  | -0.00003500 |
| 6 | -4.08246100 | 0.56246200  | -1.51854000 | 1  | 1.00213500  | 4.82412600  | 0.53836300  | 6     | 0.29136600  | 1.39056000  | -0.00004600 |
| 6 | -5.06354400 | -0.05953200 | 0.59473800  | 7  | 1.56957500  | 1.58658200  | 0.03137800  | 6     | 1.51461700  | 0.68882900  | -0.00000700 |
| 6 | -5.13470800 | 1.44372300  | -1.74512500 | 7  | 1.21986300  | -0.94103400 | -1.03066200 | 6     | 2.76701400  | 1.35739100  | 0.00012500  |
| 1 | -3.27507200 | 0.46828900  | -2.24643500 | 8  | -0.23910200 | -2.57671000 | -1.70471900 | 6     | 2.75801400  | 2.76289500  | 0.00016900  |
| 6 | -6.11534000 | 0.82091800  | 0.36618700  | 6  | 0.94127500  | -2.16915000 | -1.55786800 | 6     | 1.55827500  | 3.45738100  | 0.00007800  |
| 1 | -5.02013400 | -0.61528600 | 1.53446500  | 6  | 2.05402200  | -3.01334500 | -1.93500600 | 1     | -0.59016200 | 3.36910300  | -0.00000400 |
| 6 | -6.15730000 | 1.57608700  | -0.80635700 | 1  | 1.79741800  | -3.97918600 | -2.37263400 | 6     | 3.93110600  | 0.51851300  | 0.00011000  |
| 1 | -5.15443800 | 2.03737100  | -2.66221800 | 6  | 3.33885200  | -2.62418800 | -1.72822600 | 1     | 3.70847200  | 3.30270600  | 0.00026700  |
| 1 | -6.90084600 | 0.93193900  | 1.11744800  | 1  | 4.17335800  | -3.27749400 | -1.99825900 | 1     | 1.55806100  | 4.54853800  | 0.00013000  |
| 1 | -6.97943700 | 2.27387600  | -0.98175000 | 6  | 3.62044600  | -1.35372400 | -1.14488200 | 6     | 3.83697100  | -0.84373700 | -0.00002000 |
| 8 | -1.80125900 | -0.86786400 | -0.85359300 | 6  | 2.50604800  | -0.52686900 | -0.82131500 | 6     | 2.53957100  | -1.50172800 | -0.00010300 |
| 1 | -2.25327100 | -3.96749700 | 1.65403000  | 6  | 2.73712900  | 0.74536100  | -0.24393700 | 1     | 4.91427100  | 0.99831800  | 0.00020000  |
| 6 | 1.36585700  | 2.63217500  | -1.03210100 | 6  | 4.03753900  | 1.14808600  | 0.02703100  | 1     | 4.72471600  | -1.47879700 | 0.00001000  |
| 6 | 1.57144000  | 2.19349500  | 1.40616600  | 1  | 4.22511900  | 2.11786300  | 0.48139500  | 8     | 2.29868100  | -2.71854700 | -0.00006200 |
| 6 | 2.26778300  | 3.84129700  | -0.89018500 | 6  | 5.13277200  | 0.32201500  | -0.27201300 | 6     | -1.76716700 | 0.70712100  | -1.23711500 |
| 1 | 0.31530400  | 2.94930200  | -0.94495700 | 1  | 6.14244100  | 0.66543600  | -0.04117000 | 6     | -1.76711400 | 0.70720300  | 1.23700700  |
| 1 | 1.48254700  | 2.12882500  | -2.00185500 | 6  | 4.92441400  | -0.91001000 | -0.85938000 | 6     | -2.61915000 | 1.96354500  | -1.25457400 |
| 6 | 2.34346700  | 3.49644000  | 1.57705600  | 1  | 5.76615800  | -1.56337000 | -1.10259900 | 1     | -2.41851700 | -0.17938000 | -1.26410200 |
| 1 | 0.51457800  | 2.37957600  | 1.64206300  | 1  | -1.24485400 | -1.69229800 | -1.18933100 | 1     | -1.08678400 | 0.64881400  | -2.09740500 |
| 1 | 1.93082000  | 1.41382500  | 2.09018400  | 1  | -1.60620400 | -3.76650300 | 0.04627100  | 6     | -2.61909200 | 1.96362400  | 1.25447200  |
| 6 | 2.05205800  | 4.49070500  | 0.46614600  | 46 | -0.16552400 | 0.35864000  | -0.26505000 | 1     | -2.41844900 | -0.17930300 | 1.26414200  |
| 1 | 2.02841000  | 4.53804300  | -1.70743500 | 17 | -1.65111200 | 1.93992600  | 0.65047900  | 1     | -1.08664400 | 0.64898200  | 2.09723600  |

|       |             |             |             |    |             |             |             |       |             |             |             |
|-------|-------------|-------------|-------------|----|-------------|-------------|-------------|-------|-------------|-------------|-------------|
| 6     | -3.47314600 | 2.06278900  | -0.00003700 | 1  | -5.14356800 | 2.19815100  | 0.98327700  | 1     | 2.66454200  | -3.11832800 | -0.58148800 |
| 1     | -3.25159200 | 1.91569700  | -2.15375200 | 6  | -3.05390800 | 1.97033900  | 0.49757200  | 6     | 3.34539100  | -1.07917700 | -0.40289400 |
| 1     | -1.99807800 | 2.86326200  | -1.38550200 | 1  | -2.84112700 | 3.02621400  | 0.67539800  | 6     | 2.88264500  | -0.77156800 | 0.89511700  |
| 1     | -3.25147700 | 1.91582400  | 2.15369000  | 6  | -2.02014100 | 1.13987600  | 0.05858200  | 6     | 4.29648100  | -0.24289100 | -0.98316100 |
| 1     | -1.99798400 | 2.86332600  | 1.38529300  | 8  | 1.31179500  | -1.73888900 | -1.37135800 | 6     | 3.33126300  | 0.36441300  | 1.57647200  |
| 1     | -4.06174600 | 2.99190700  | -0.00005500 | 1  | 0.52069200  | -2.52929900 | -1.30052500 | 1     | 2.27152700  | -1.52323600 | 1.44775600  |
| 1     | -4.20472200 | 1.23623000  | 0.00000500  | 6  | 2.64393600  | -2.17251200 | -1.15651400 | 6     | 4.77153100  | 0.87460000  | -0.29033300 |
| 7     | -0.92725200 | 0.55070000  | -0.00008100 | 6  | -0.22445500 | 2.75445800  | 0.57979600  | 1     | 4.65382700  | -0.45238300 | -1.99477700 |
| 46    | -0.29279200 | -1.49435700 | -0.00004400 | 6  | -0.09867500 | 1.44685700  | -1.46322300 | 6     | 4.28204500  | 1.18876200  | 0.97831000  |
| 7     | 1.46878700  | -0.65684000 | -0.00027700 | 6  | -0.32400100 | 4.05907800  | -0.20250400 | 1     | 2.91950800  | 0.59237000  | 2.56178100  |
| 17    | -2.40604800 | -2.48928000 | 0.00027700  | 1  | 0.84046300  | 2.55072400  | 0.81055600  | 1     | 5.51740600  | 1.52105400  | -0.75889000 |
|       |             |             |             | 1  | -0.73449500 | 2.80079300  | 1.55154200  | 1     | 4.64280700  | 2.07788900  | 1.49955000  |
|       |             |             |             | 6  | -0.24681500 | 2.70561000  | -2.30836300 |       |             |             |             |
| A-TS1 |             |             |             | 1  | 0.97923600  | 1.23235300  | -1.31070000 |       |             |             |             |
| 7     | -1.31159900 | -1.14962200 | -0.36657500 | 1  | -0.51772000 | 0.56655000  | -1.96733000 | A-TS2 |             |             |             |
| 8     | -0.59228700 | -3.21478600 | -1.04859200 | 6  | 0.32078300  | 3.91081500  | -1.57325600 | 6     | -2.48485600 | 2.22683900  | 0.82212600  |
| 6     | -1.54937900 | -2.43456700 | -0.74702200 | 1  | 0.14688800  | 4.87355500  | 0.36988300  | 6     | -1.97111800 | 1.40287600  | -1.40444200 |
| 6     | -2.91400700 | -2.88874300 | -0.77354300 | 1  | -1.38380800 | 4.34220100  | -0.32573000 | 6     | -3.68802700 | 3.01049000  | 0.31191900  |
| 1     | -3.08554600 | -3.92517400 | -1.06630900 | 1  | 0.25288100  | 2.56171900  | -3.27904200 | 1     | -1.59391600 | 2.88360600  | 0.81058500  |
| 6     | -3.92037600 | -2.05890500 | -0.38199600 | 1  | -1.31682900 | 2.86778300  | -2.52891800 | 1     | -2.59266900 | 1.89950000  | 1.86492400  |
| 1     | -4.95157700 | -2.42154100 | -0.34071000 | 1  | 0.19851300  | 4.83004100  | -2.16659700 | 6     | -3.18067100 | 2.13161900  | -1.97705400 |
| 6     | -3.66392700 | -0.69783700 | -0.04151500 | 1  | 1.41104900  | 3.77255800  | -1.44738300 | 1     | -1.07375600 | 2.04768800  | -1.48983600 |
| 6     | -2.31390600 | -0.25265200 | -0.12225900 | 7  | -0.72720000 | 1.60895900  | -0.15575200 | 1     | -1.74544900 | 0.49001400  | -1.97053400 |
| 6     | -4.68125200 | 0.19511000  | 0.35043600  | 46 | 0.59503600  | -0.90167600 | 0.44320800  | 6     | -3.50391000 | 3.36989800  | -1.15544100 |
| 1     | -5.71200600 | -0.16395100 | 0.39836400  | 17 | -0.13570700 | -0.14779300 | 2.50739600  | 1     | -3.83166400 | 3.91370700  | 0.92520700  |
| 6     | -4.36496800 | 1.50404100  | 0.66036100  | 1  | 3.12866300  | -2.36704300 | -2.12750400 | 1     | -4.60699100 | 2.40995800  | 0.42863700  |

|   |             |             |             |       |             |             |             |   |             |             |             |
|---|-------------|-------------|-------------|-------|-------------|-------------|-------------|---|-------------|-------------|-------------|
| 1 | -2.99242700 | 2.39245600  | -3.03031500 | 6     | 3.79753300  | 0.68479000  | -0.26158300 | 1 | 1.95446500  | -1.78742000 | -2.01595400 |
| 1 | -4.04563100 | 1.44450800  | -1.97651700 | 6     | 4.07096700  | -0.68515700 | -0.35294500 | 6 | 1.89468800  | -4.13771000 | 0.55044700  |
| 1 | -4.39472600 | 3.88235100  | -1.55011600 | 6     | 4.74517100  | 1.53899400  | 0.31415100  | 1 | 1.64111900  | -3.47917300 | 2.60483600  |
| 1 | -2.67223500 | 4.09223500  | -1.25010200 | 6     | 5.27852400  | -1.18658000 | 0.11990000  | 1 | 3.05205200  | -2.79792000 | 1.81441200  |
| 7 | -2.16514900 | 1.06896000  | 0.00485200  | 1     | 3.32895900  | -1.36005900 | -0.78547800 | 1 | 2.10271800  | -4.28395200 | -1.60141400 |
| 7 | -0.67223000 | -1.21152900 | -0.57805600 | 6     | 5.95248000  | 1.03469300  | 0.79006200  | 1 | 3.40810200  | -3.42323200 | -0.82496600 |
| 8 | 1.13511900  | -2.10995100 | -1.68311200 | 1     | 4.53072900  | 2.60969000  | 0.38746800  | 1 | 2.48873600  | -5.02992800 | 0.79882900  |
| 6 | -0.05370200 | -2.25575200 | -1.10838400 | 6     | 6.22117400  | -0.32965500 | 0.69266200  | 1 | 0.84494800  | -4.47435000 | 0.48542400  |
| 6 | -0.60464500 | -3.56217100 | -1.06835000 | 1     | 5.48550600  | -2.25651900 | 0.04761900  | 7 | 1.50356600  | -1.25809000 | -0.03385000 |
| 1 | -0.04699000 | -4.37899600 | -1.52652600 | 1     | 6.68622800  | 1.70894200  | 1.23705800  | 7 | 1.14487900  | 1.53117000  | -0.06889700 |
| 6 | -1.78712500 | -3.74793700 | -0.40520500 | 1     | 7.16657300  | -0.72880400 | 1.06707300  | 6 | 0.93662700  | 2.86594800  | -0.03813900 |
| 1 | -2.20958400 | -4.75094700 | -0.30168100 | 46    | 0.67332300  | 0.39932500  | 0.12018200  | 6 | 2.05413800  | 3.76872400  | -0.00493700 |
| 6 | -2.49386100 | -2.64464800 | 0.14437300  | 17    | -0.01872300 | 0.29716300  | 2.34512500  | 1 | 1.81875100  | 4.83319200  | -0.01298700 |
| 6 | -1.92626300 | -1.35207000 | -0.04525800 |       |             |             |             | 6 | 3.32739200  | 3.29922900  | 0.05400500  |
| 6 | -2.65597000 | -0.18449200 | 0.35035700  |       |             |             |             | 1 | 4.17991900  | 3.98259500  | 0.08908900  |
| 6 | -3.81136500 | -0.37758300 | 1.10627600  | A-TS3 |             |             |             | 6 | 3.56389800  | 1.89745100  | 0.08170200  |
| 1 | -4.36189600 | 0.49323900  | 1.46687400  | 8     | -0.22937300 | 3.39719400  | -0.06063300 | 6 | 2.42867100  | 1.03341300  | 0.01738500  |
| 6 | -4.31555200 | -1.66029700 | 1.37717100  | 1     | -1.16282900 | 2.93253100  | 0.45847200  | 6 | 2.65107100  | -0.37301800 | 0.02701400  |
| 1 | -5.23459000 | -1.75542800 | 1.95960300  | 8     | -2.19917300 | 2.43525900  | 0.89767600  | 6 | 3.95202100  | -0.85652400 | 0.09706100  |
| 6 | -3.70087900 | -2.78361500 | 0.86576900  | 6     | 1.15928100  | -1.87378500 | 1.28390700  | 1 | 4.12340200  | -1.93018900 | 0.10605700  |
| 1 | -4.12350600 | -3.77988400 | 1.01322400  | 6     | 1.56027600  | -2.28476200 | -1.11880500 | 6 | 5.06123900  | 0.00046600  | 0.15596500  |
| 6 | 2.52470800  | 1.26338000  | -0.77796500 | 6     | 2.00064300  | -3.08450200 | 1.64240900  | 1 | 6.06686200  | -0.42026500 | 0.20779100  |
| 1 | 2.56038100  | 2.37015600  | -0.87806000 | 1     | 0.10171200  | -2.17567400 | 1.20978700  | 6 | 4.86557900  | 1.36406900  | 0.15004300  |
| 8 | 1.78488100  | 0.63991300  | -1.64807500 | 1     | 1.21964800  | -1.08008800 | 2.04230500  | 1 | 5.71147500  | 2.05459500  | 0.19331700  |
| 1 | 1.38529800  | -1.15748500 | -1.73454800 | 6     | 2.31637900  | -3.56622300 | -0.79446900 | 6 | -2.69976600 | 1.81579600  | -0.09168700 |
| 1 | 1.75373200  | 1.50592000  | 0.52303300  | 1     | 0.51193400  | -2.54469100 | -1.32854000 | 1 | -2.64343800 | 2.28791700  | -1.09743900 |

|       |             |             |             |   |             |             |             |   |             |             |             |
|-------|-------------|-------------|-------------|---|-------------|-------------|-------------|---|-------------|-------------|-------------|
| 6     | -3.80097100 | 0.86472700  | 0.09080300  | 1 | -2.02501300 | 2.42017100  | 2.81750000  | 1 | 3.42362000  | -3.21711400 | 1.51225600  |
| 6     | -4.18287200 | 0.46638700  | 1.37866300  | 1 | -3.94416500 | 3.99026300  | 2.72367600  | 1 | 1.93927500  | -4.16101000 | 1.53680600  |
| 6     | -4.46741500 | 0.34530900  | -1.02611500 | 6 | 1.07381200  | 2.11619300  | 0.21714700  | 1 | 0.24573600  | -1.97380200 | 4.15941300  |
| 6     | -5.22688500 | -0.43515600 | 1.54277600  | 6 | 2.30530400  | 1.43581800  | 0.75980700  | 1 | -0.05660900 | -3.32381100 | 3.06043900  |
| 1     | -3.64541400 | 0.87804500  | 2.23539300  | 8 | 2.31771300  | 1.01642300  | 1.90705700  | 1 | 2.35029700  | -3.31899800 | 3.81168700  |
| 6     | -5.51336000 | -0.55460100 | -0.85937300 | 6 | 3.49299700  | 1.27730500  | -0.12240100 | 1 | 2.52632000  | -1.66718000 | 3.21438400  |
| 1     | -4.14307000 | 0.63777100  | -2.02877100 | 6 | 4.60345600  | 0.59509300  | 0.40096300  | 7 | 0.35459800  | -1.88074300 | 0.74019700  |
| 6     | -5.89212200 | -0.94603100 | 0.42501800  | 6 | 3.55406500  | 1.76256500  | -1.43740100 | 7 | -2.01462300 | -0.73461200 | -0.18902500 |
| 1     | -5.52683800 | -0.74739900 | 2.54557900  | 6 | 5.74211000  | 0.39979400  | -0.37001200 | 8 | -3.33756900 | 1.11428400  | -0.55970000 |
| 1     | -6.02773200 | -0.96346200 | -1.73134000 | 1 | 4.54123700  | 0.22272100  | 1.42620000  | 6 | -3.18049800 | -0.20639600 | -0.52092800 |
| 1     | -6.70938800 | -1.65906400 | 0.55734200  | 6 | 4.69680400  | 1.57027900  | -2.20845500 | 6 | -4.31268500 | -0.97768800 | -0.88769400 |
| 46    | -0.27730200 | 0.03212800  | -0.40536900 | 1 | 2.70675200  | 2.29083400  | -1.88013900 | 1 | -5.24484200 | -0.46085100 | -1.11444800 |
| 1     | -1.57088900 | 0.94333200  | -0.66093200 | 6 | 5.79074200  | 0.88787900  | -1.67758300 | 6 | -4.15719900 | -2.32832700 | -1.01517300 |
| 17    | -1.76954100 | -1.73279300 | -0.75049900 | 1 | 6.59838100  | -0.13570100 | 0.04596700  | 1 | -4.98602100 | -2.95340300 | -1.35738200 |
|       |             |             |             | 1 | 4.72961500  | 1.94744600  | -3.23237800 | 6 | -2.90904700 | -2.93779500 | -0.72573400 |
|       |             |             |             | 1 | 6.68403200  | 0.73237700  | -2.28691100 | 6 | -1.86336700 | -2.09929000 | -0.23893900 |
| A-TS4 |             |             |             | 1 | 1.26536400  | 3.02409000  | -0.37070300 | 6 | -0.61504700 | -2.69017300 | 0.13798700  |
| 6     | -3.40131500 | 4.78706100  | 0.79089500  | 6 | 1.76348000  | -2.22062100 | 0.56875800  | 6 | -0.41359000 | -4.03495100 | -0.15827400 |
| 6     | -2.48434100 | 4.73282900  | -0.26078300 | 6 | 0.04787600  | -1.39519400 | 2.09008000  | 1 | 0.55213100  | -4.48769400 | 0.06886800  |
| 6     | -1.40656800 | 3.85573400  | -0.20868100 | 6 | 2.33323400  | -3.13649100 | 1.64804100  | 6 | -1.42572500 | -4.83856200 | -0.70826900 |
| 6     | -1.21859500 | 3.00978300  | 0.90300300  | 1 | 2.32635300  | -1.27034300 | 0.58811700  | 1 | -1.22160500 | -5.89253600 | -0.90822700 |
| 6     | -2.15342300 | 3.07702800  | 1.95265600  | 1 | 1.89682500  | -2.62671900 | -0.44381700 | 6 | -2.67602700 | -4.31367000 | -0.94750400 |
| 6     | -3.22984600 | 3.95616600  | 1.89810700  | 6 | 0.49797500  | -2.37367600 | 3.16482300  | 1 | -3.48967500 | -4.93402500 | -1.32987900 |
| 1     | -4.25086100 | 5.47140800  | 0.74292900  | 1 | 0.58594300  | -0.44439200 | 2.24072400  | 6 | -0.12431300 | 2.04025400  | 0.98053200  |
| 1     | -2.61689700 | 5.37373600  | -1.13513900 | 1 | -1.02770000 | -1.17512700 | 2.15252700  | 1 | -0.04849300 | 1.48670600  | 1.92252500  |
| 1     | -0.71451500 | 3.80131000  | -1.05426300 | 6 | 1.99452300  | -2.62011100 | 3.03906700  | 1 | -2.49299800 | 1.54821200  | -0.34281100 |

|       |             |             |             |   |             |             |             |       |             |             |             |
|-------|-------------|-------------|-------------|---|-------------|-------------|-------------|-------|-------------|-------------|-------------|
| 1     | 0.86041700  | 1.48284800  | -1.32713300 | 6 | -6.49244500 | -1.55406900 | -1.55641100 | 8     | -0.04569800 | 2.72675500  | -1.25210000 |
| 46    | -0.15238600 | 0.56517300  | -0.61079000 | 1 | -4.34541400 | -1.48927100 | -1.46944900 | 6     | 1.19990300  | 2.62446600  | -1.07386000 |
| 17    | 0.10159700  | -0.73356400 | -2.59798300 | 6 | -7.68917800 | -0.93533100 | -1.19609000 | 6     | 2.11586100  | 3.72387300  | -1.23552800 |
|       |             |             |             | 1 | -8.60546600 | 0.73604700  | -0.17724000 | 1     | 1.69495600  | 4.68781000  | -1.52248900 |
|       |             |             |             | 1 | -6.50765800 | -2.48307700 | -2.13067200 | 6     | 3.45142600  | 3.54543300  | -1.02235900 |
|       |             |             |             | 1 | -8.64322900 | -1.38014200 | -1.48929800 | 1     | 4.14373700  | 4.38477800  | -1.13085300 |
| A-TS5 |             |             |             | 8 | -3.98550900 | 1.89105500  | 0.62557100  | 6     | 3.97461900  | 2.26459500  | -0.67484600 |
| 1     | -0.58240900 | 1.53093000  | -0.73495900 | 1 | -2.63219400 | 0.20048100  | -1.54080400 | 6     | 3.03795700  | 1.20077900  | -0.54805000 |
| 6     | -2.67158100 | 0.20436300  | -0.43833400 | 1 | -2.69553800 | -0.86298600 | -0.18455000 | 6     | 3.47499200  | -0.11998000 | -0.29209800 |
| 6     | -1.46178000 | 0.90158100  | 0.13957600  | 6 | 2.32765400  | -1.89755500 | 1.00628100  | 6     | 4.83273700  | -0.34463300 | -0.10369500 |
| 6     | -1.09763500 | 0.64663500  | 1.57092900  | 6 | 2.60304300  | -2.11385000 | -1.44685500 | 1     | 5.20383000  | -1.34672200 | 0.09819800  |
| 6     | -1.44932800 | -0.52745700 | 2.25581600  | 6 | 3.36081700  | -2.98756500 | 1.23544300  | 6     | 5.76050400  | 0.71047700  | -0.18013800 |
| 6     | -0.37382500 | 1.62871100  | 2.27358200  | 1 | 1.32701200  | -2.35545900 | 0.99442200  | 1     | 6.81938800  | 0.49933300  | -0.02164700 |
| 6     | -1.07527600 | -0.71595200 | 3.58441000  | 1 | 2.33024200  | -1.13996300 | 1.80367600  | 6     | 5.34174100  | 1.99313300  | -0.47478800 |
| 1     | -1.99586200 | -1.31629500 | 1.73527300  | 6 | 3.64912500  | -3.19623400 | -1.24655100 | 1     | 6.06252700  | 2.80985500  | -0.56186100 |
| 6     | 0.00716100  | 1.43536200  | 3.59662200  | 1 | 1.61674700  | -2.58449000 | -1.57444200 | 46    | 0.46979700  | -0.15731800 | -0.46446900 |
| 1     | -0.11203300 | 2.56020700  | 1.76126200  | 1 | 2.79578100  | -1.50632400 | -2.34231200 | 17    | -0.67018700 | -2.26774700 | -0.61538300 |
| 6     | -0.34112800 | 0.25787800  | 4.26124400  | 6 | 3.40888500  | -3.94590200 | 0.05504800  | 1     | -1.71056400 | 1.98001800  | 0.11265700  |
| 1     | -1.36210700 | -1.63789100 | 4.09634800  | 1 | 3.07988700  | -3.52002100 | 2.15677500  |       |             |             |             |
| 1     | 0.56843100  | 2.21457600  | 4.11810700  | 1 | 4.35755200  | -2.56505900 | 1.43994700  |       |             |             |             |
| 1     | -0.05007900 | 0.10543500  | 5.30313300  | 1 | 3.58778700  | -3.88114500 | -2.10597900 | A-TS6 |             |             |             |
| 6     | -3.97030400 | 0.85922100  | -0.02171800 | 1 | 4.66989600  | -2.78194900 | -1.27908700 | 6     | -2.39320800 | 0.91195100  | 0.39634500  |
| 6     | -5.24321200 | 0.20252200  | -0.44505800 | 1 | 4.17397700  | -4.72123200 | 0.20974400  | 1     | -3.21559700 | 1.44819800  | 0.87753400  |
| 6     | -6.45351100 | 0.81543300  | -0.08834200 | 1 | 2.44220700  | -4.47518600 | -0.01309800 | 6     | -1.06725200 | 1.51187200  | 0.49884400  |
| 6     | -5.27437400 | -0.99034700 | -1.18314700 | 7 | 2.45247800  | -1.16779200 | -0.29723700 | 6     | -0.99924000 | 2.98467500  | 0.66365500  |
| 6     | -7.66794800 | 0.25161300  | -0.46009900 | 7 | 1.70427400  | 1.42742600  | -0.69474200 | 6     | -1.85516900 | 3.82254300  | -0.06965500 |
| 1     | -6.40590500 | 1.74298800  | 0.48645700  |   |             |             |             |       |             |             |             |



|   |             |             |             |   |             |             |             |       |             |             |             |
|---|-------------|-------------|-------------|---|-------------|-------------|-------------|-------|-------------|-------------|-------------|
| 6 | -0.08776300 | 3.57271700  | 1.55534200  | 1 | 1.99571400  | 1.29688000  | -2.45329800 | 1     | 5.35039000  | -3.13146700 | -0.31959800 |
| 6 | -1.80265300 | 5.20396600  | 0.08643300  | 1 | 2.74518900  | -0.28305000 | -2.62173800 | 6     | 3.84681600  | -3.22106000 | 1.20969300  |
| 1 | -2.55954500 | 3.36911000  | -0.77324100 | 6 | 3.62697200  | 2.04023800  | 0.35547900  | 1     | 4.26078200  | -4.10386400 | 1.70278800  |
| 6 | -0.03536100 | 4.95517400  | 1.71352000  | 1 | 1.56001300  | 2.19323100  | -0.19076500 | 1     | -1.33977700 | -0.56505500 | 2.03467500  |
| 1 | 0.57144400  | 2.92966300  | 2.14640000  | 1 | 1.83082700  | 1.13509500  | 1.20516600  | 1     | -0.40106700 | 1.31214000  | -0.83235500 |
| 6 | -0.89145400 | 5.77466100  | 0.97732800  | 6 | 4.10878900  | 2.50786400  | -1.00695700 | 46    | 0.06033400  | -0.20200000 | -1.05283700 |
| 1 | -2.47299300 | 5.84287100  | -0.49307400 | 1 | 4.30015700  | 1.68832700  | -3.01091200 | 17    | 0.77128900  | -2.18089900 | -2.16122800 |
| 1 | 0.67148900  | 5.39623200  | 2.42019200  | 1 | 4.91325000  | 0.65781000  | -1.73328200 |       |             |             |             |
| 1 | -0.84981500 | 6.85949100  | 1.09864800  | 1 | 3.58387700  | 2.87312400  | 1.07425000  |       |             |             |             |
| 6 | -2.69614400 | -0.17882800 | -0.40799100 | 1 | 4.32554100  | 1.29915200  | 0.78191800  | A-TS7 |             |             |             |
| 6 | -4.03254400 | -0.82381700 | -0.36008800 | 1 | 5.11411100  | 2.95048200  | -0.94721300 | 6     | -2.99748600 | -2.24225000 | 0.66931900  |
| 6 | -4.43974000 | -1.63660300 | -1.42910200 | 1 | 3.44150200  | 3.31137400  | -1.36670000 | 1     | -3.97969600 | -2.45064100 | 1.09851700  |
| 6 | -4.90039500 | -0.65967300 | 0.73090200  | 7 | 2.18997100  | 0.25479200  | -0.67227800 | 6     | -1.88884900 | -3.19908700 | 0.97484900  |
| 6 | -5.68853900 | -2.25056900 | -1.41457000 | 7 | 0.87308100  | -1.01789800 | 1.45390600  | 6     | -0.62250200 | -2.59457900 | 1.53700900  |
| 1 | -3.75510000 | -1.77511700 | -2.26739700 | 8 | -1.03873200 | -1.21286300 | 2.69898100  | 6     | -0.64490100 | -1.41549700 | 2.29159400  |
| 6 | -6.14911700 | -1.27383300 | 0.74278100  | 6 | 0.19479700  | -1.62701900 | 2.39810700  | 6     | 0.61217400  | -3.22415100 | 1.33001900  |
| 1 | -4.58547900 | -0.06338700 | 1.59076600  | 6 | 0.70014300  | -2.72997200 | 3.13793900  | 6     | 0.53146800  | -0.88061500 | 2.81768400  |
| 6 | -6.54919200 | -2.06903800 | -0.33171900 | 1 | 0.09584500  | -3.16263300 | 3.93561500  | 1     | -1.59416000 | -0.89516800 | 2.45171700  |
| 1 | -5.99344500 | -2.87772000 | -2.25567800 | 6 | 1.92156700  | -3.22929500 | 2.77869800  | 6     | 1.79130600  | -2.68505300 | 1.83990500  |
| 1 | -6.81065800 | -1.14036300 | 1.60197300  | 1 | 2.33999200  | -4.09673800 | 3.29562800  | 1     | 0.64835700  | -4.13845200 | 0.72896900  |
| 1 | -7.52859100 | -2.55322500 | -0.32054800 | 6 | 2.64794900  | -2.65799700 | 1.69881900  | 6     | 1.75618700  | -1.50633900 | 2.58694400  |
| 8 | -1.88536800 | -0.66718700 | -1.29352400 | 6 | 2.08170900  | -1.50813700 | 1.06996800  | 1     | 0.48073700  | 0.04056600  | 3.40446300  |
| 1 | -0.32402300 | 1.00581000  | 1.13326400  | 6 | 2.76433900  | -0.92171000 | -0.04463800 | 1     | 2.74538800  | -3.18332000 | 1.64606400  |
| 6 | 2.74726000  | 0.62668200  | -2.00596700 | 6 | 3.90135900  | -1.54438500 | -0.52712000 | 1     | 2.68188800  | -1.07879100 | 2.98330700  |
| 6 | 2.24141600  | 1.43931200  | 0.23468600  | 1 | 4.38711000  | -1.17356900 | -1.42640500 | 6     | -2.91128500 | -1.14811400 | -0.12297100 |
| 6 | 4.09247800  | 1.34568600  | -1.98585700 | 6 | 4.44768100  | -2.68096600 | 0.09674300  | 6     | -4.01938800 | -0.20489000 | -0.34988400 |

|   |             |             |             |       |             |             |             |   |             |             |             |
|---|-------------|-------------|-------------|-------|-------------|-------------|-------------|---|-------------|-------------|-------------|
| 6 | -4.05628700 | 0.56873700  | -1.51952600 | 1     | 1.02992400  | 4.82903200  | 0.53935500  | 6 | -0.62955200 | -3.70135800 | 2.35444800  |
| 6 | -5.05469000 | -0.05265000 | 0.58507900  | 7     | 1.57329600  | 1.58723900  | 0.03383900  | 6 | -1.34772200 | -2.79761000 | 1.57748100  |
| 6 | -5.10569600 | 1.45124400  | -1.75464200 | 7     | 1.19867900  | -0.93702300 | -1.03337600 | 6 | -1.02008300 | -1.43759700 | 1.58637700  |
| 1 | -3.24227200 | 0.47338500  | -2.23998200 | 8     | -0.27886600 | -2.55732600 | -1.69968800 | 6 | 0.04200700  | -1.00452400 | 2.39666900  |
| 6 | -6.10360300 | 0.82934800  | 0.34866400  | 6     | 0.91282600  | -2.15738900 | -1.55927300 | 6 | 0.75884100  | -1.90563600 | 3.17564000  |
| 1 | -5.01973900 | -0.60856400 | 1.52508200  | 6     | 2.00830900  | -3.01261200 | -1.94767700 | 1 | 0.99216000  | -3.97586600 | 3.75461200  |
| 6 | -6.13561000 | 1.58478700  | -0.82400200 | 1     | 1.74025700  | -3.97504400 | -2.38559100 | 1 | -0.88572200 | -4.76254500 | 2.32424000  |
| 1 | -5.11752100 | 2.04515300  | -2.67178600 | 6     | 3.29828900  | -2.63349700 | -1.74807000 | 1 | -2.14530700 | -3.16013600 | 0.92584800  |
| 1 | -6.89484200 | 0.94127100  | 1.09383700  | 1     | 4.12532700  | -3.29302500 | -2.02523900 | 1 | 0.31186200  | 0.05777600  | 2.39783500  |
| 1 | -6.95552500 | 2.28362600  | -1.00575300 | 6     | 3.59380000  | -1.36779200 | -1.16273200 | 1 | 1.58307300  | -1.55091300 | 3.79938600  |
| 8 | -1.78372200 | -0.87187000 | -0.83802800 | 6     | 2.48915300  | -0.53204700 | -0.83043000 | 6 | -1.71854900 | -0.43693800 | 0.74874100  |
| 1 | -2.26310900 | -3.94912400 | 1.69162500  | 6     | 2.73132000  | 0.73741200  | -0.24988600 | 6 | -3.04121600 | -0.56600400 | 0.31795900  |
| 6 | 1.36794400  | 2.63226500  | -1.02921000 | 6     | 4.03660800  | 1.12609800  | 0.01665600  | 6 | -3.84789500 | 0.57271600  | -0.00818800 |
| 6 | 1.58858700  | 2.19615200  | 1.40691200  | 1     | 4.23500300  | 2.09224200  | 0.47431000  | 8 | -3.41334000 | 1.75169500  | 0.00079200  |
| 6 | 2.27902800  | 3.83555200  | -0.89625800 | 6     | 5.12353600  | 0.29107200  | -0.29031400 | 6 | -5.29479600 | 0.37233500  | -0.30967000 |
| 1 | 0.31994200  | 2.95586700  | -0.93391800 | 1     | 6.13697100  | 0.62514400  | -0.06213800 | 6 | -6.12287100 | 1.50608200  | -0.34486400 |
| 1 | 1.47281300  | 2.12735900  | -1.99957000 | 6     | 4.90356200  | -0.93635100 | -0.88177300 | 6 | -5.86606700 | -0.88222400 | -0.57757700 |
| 6 | 2.36993500  | 3.49440400  | 1.57088400  | 1     | 5.73890800  | -1.59542500 | -1.13126800 | 6 | -7.47925500 | 1.39014500  | -0.62459100 |
| 1 | 0.53405400  | 2.38881600  | 1.64903500  | 1     | -1.18426900 | -1.72028200 | -1.20728400 | 1 | -5.66680500 | 2.47736900  | -0.14574900 |
| 1 | 1.94684700  | 1.41544700  | 2.09046400  | 1     | -1.62119400 | -3.78578600 | 0.07844200  | 6 | -7.22254600 | -0.99712200 | -0.86866200 |
| 6 | 2.07716700  | 4.48881600  | 0.46040100  | 46    | -0.17585200 | 0.36626700  | -0.25334900 | 1 | -5.24917700 | -1.78231600 | -0.58293300 |
| 1 | 2.03952600  | 4.53261500  | -1.71319800 | 17    | -1.64604100 | 1.94878500  | 0.67896900  | 6 | -8.03450200 | 0.13663300  | -0.88790700 |
| 1 | 3.33452600  | 3.55093100  | -1.04615600 |       |             |             |             | 1 | -8.11042600 | 2.28179700  | -0.64120200 |
| 1 | 2.08743900  | 3.91211600  | 2.54931800  |       |             |             |             | 1 | -7.64836300 | -1.97943400 | -1.08497400 |
| 1 | 3.45480700  | 3.31980800  | 1.64213300  | A-TS8 |             |             |             | 1 | -9.09972300 | 0.04354600  | -1.11229600 |
| 1 | 2.70294000  | 5.38683600  | 0.56965100  | 6     | 0.42593300  | -3.26148000 | 3.15254000  | 8 | -1.12970200 | 2.06695000  | -1.05885600 |

|   |             |             |             |       |             |             |             |   |             |             |             |
|---|-------------|-------------|-------------|-------|-------------|-------------|-------------|---|-------------|-------------|-------------|
| 6 | 3.72708200  | -1.42504800 | -0.43070300 | 1     | 5.08033000  | 0.37148700  | 1.03976400  | 6 | -2.74237700 | -0.75033000 | 0.36672800  |
| 6 | 3.25528100  | 0.29467000  | -2.11826100 | 6     | 4.31523400  | 2.15342600  | 1.98747700  | 6 | -3.79309700 | -0.86356400 | -0.63059400 |
| 6 | 5.18704200  | -1.48619500 | -0.86606000 | 1     | 5.19805100  | 2.25829800  | 2.62116300  | 8 | -3.61720500 | -1.48815400 | -1.67738400 |
| 1 | 3.15355400  | -2.20579600 | -0.95746900 | 6     | 3.30001400  | 3.08213000  | 2.05721200  | 6 | -5.09714500 | -0.16622000 | -0.38494000 |
| 1 | 3.60306700  | -1.63608600 | 0.64147700  | 1     | 3.36082700  | 3.93108800  | 2.74203200  | 6 | -6.17871100 | -0.48880100 | -1.21628000 |
| 6 | 4.72842100  | 0.36460800  | -2.47365400 | 46    | 0.70579100  | -0.47768500 | -0.79038900 | 6 | -5.27811200 | 0.80342600  | 0.61149700  |
| 1 | 2.74559700  | -0.43331000 | -2.77209500 | 1     | -3.48393200 | -1.56081200 | 0.26660300  | 6 | -7.41422000 | 0.12603400  | -1.04537000 |
| 1 | 2.74224600  | 1.25653600  | -2.25635800 | 1     | -0.90775300 | -0.50837900 | -0.51627100 | 1 | -6.01237200 | -1.23285100 | -1.99848100 |
| 6 | 5.37101100  | -1.00163400 | -2.29538100 | 1     | -1.42968100 | 0.59571200  | 0.98089200  | 6 | -6.51235800 | 1.42837200  | 0.77673700  |
| 1 | 5.52891700  | -2.52683300 | -0.75825000 | 1     | -2.03700600 | 2.11557400  | -0.60871600 | 1 | -4.44130200 | 1.09579100  | 1.25010700  |
| 1 | 5.83654100  | -0.89484700 | -0.20010800 | 17    | 0.59175600  | -2.74744300 | -1.30850900 | 6 | -7.58495400 | 1.08671600  | -0.04649900 |
| 1 | 4.83210600  | 0.72452100  | -3.50840200 |       |             |             |             | 1 | -8.25116900 | -0.13975200 | -1.69581700 |
| 1 | 5.23262600  | 1.11316600  | -1.83584900 |       |             |             |             | 1 | -6.63814700 | 2.18874700  | 1.55136800  |
| 1 | 6.43786600  | -0.97927000 | -2.56349600 | A-TS9 |             |             |             | 1 | -8.55411900 | 1.57359500  | 0.08701700  |
| 1 | 4.89487100  | -1.71451600 | -2.99142700 | 6     | 0.93859200  | -2.27331100 | 3.63068500  | 8 | -1.87334000 | 1.59597300  | -0.47271000 |
| 7 | 3.02486600  | -0.15416500 | -0.71740700 | 6     | 0.36198200  | -1.01834100 | 3.42485600  | 6 | 3.27444400  | -0.92109600 | 0.46175300  |
| 7 | 0.91022500  | 1.53200400  | -0.30031300 | 6     | -0.45071700 | -0.79783600 | 2.31620700  | 6 | 3.48270900  | -0.20122000 | -1.90351000 |
| 6 | -0.12028300 | 2.37500400  | -0.27984500 | 6     | -0.69794000 | -1.82101500 | 1.38656500  | 6 | 4.78233300  | -1.06373200 | 0.56327100  |
| 6 | -0.09652800 | 3.52823800  | 0.55230200  | 6     | -0.11771600 | -3.07666500 | 1.60860100  | 1 | 2.84203200  | -1.89549100 | 0.18669600  |
| 1 | -0.97013000 | 4.18198000  | 0.56648500  | 6     | 0.69203700  | -3.30047000 | 2.72038100  | 1 | 2.81102900  | -0.61642100 | 1.41151000  |
| 6 | 1.01240000  | 3.77946200  | 1.31987000  | 1     | 1.57365400  | -2.44998200 | 4.50206300  | 6 | 4.99105300  | -0.38422000 | -1.84173000 |
| 1 | 1.03838300  | 4.64473400  | 1.98720800  | 1     | 0.54342300  | -0.20771700 | 4.13497000  | 1 | 3.03069400  | -1.12539800 | -2.29356400 |
| 6 | 2.14495600  | 2.92317000  | 1.25707500  | 1     | -0.89373100 | 0.19121900  | 2.16105400  | 1 | 3.18720500  | 0.61493500  | -2.57722900 |
| 6 | 2.06173600  | 1.80729700  | 0.37803900  | 1     | -0.29043200 | -3.87659000 | 0.88540300  | 6 | 5.37738400  | -1.41487000 | -0.79186100 |
| 6 | 3.15394500  | 0.89642000  | 0.25144500  | 1     | 1.13407000  | -4.28748800 | 2.87566900  | 1 | 4.99018400  | -1.85651600 | 1.29784100  |
| 6 | 4.24703100  | 1.07161500  | 1.08527800  | 6     | -1.56957800 | -1.58807300 | 0.18931100  | 1 | 5.24823300  | -0.15471600 | 0.97779600  |

|    |             |             |             |
|----|-------------|-------------|-------------|
| 1  | 5.32254800  | -0.70705200 | -2.84035400 |
| 1  | 5.51192500  | 0.57002700  | -1.66336000 |
| 1  | 6.47087100  | -1.51728200 | -0.72854000 |
| 1  | 4.99241600  | -2.40199000 | -1.10234700 |
| 7  | 2.81021700  | 0.04469800  | -0.58946300 |
| 7  | 0.42323300  | 1.46915700  | -0.24003300 |
| 6  | -0.74306100 | 2.12816500  | -0.12507300 |
| 6  | -0.77522700 | 3.48183100  | 0.33523800  |
| 1  | -1.75554600 | 3.95016900  | 0.42516200  |
| 6  | 0.38307400  | 4.13551200  | 0.62719100  |
| 1  | 0.37255600  | 5.17323200  | 0.96989000  |
| 6  | 1.63016300  | 3.47046900  | 0.47601800  |
| 6  | 1.60693200  | 2.10991000  | 0.04397600  |
| 6  | 2.84113500  | 1.42937900  | -0.14795700 |
| 6  | 4.03027900  | 2.11030000  | 0.07974900  |
| 1  | 4.97973700  | 1.60425700  | -0.07488600 |
| 6  | 4.04627000  | 3.44521500  | 0.51540000  |
| 1  | 5.00242600  | 3.94008400  | 0.69350900  |
| 6  | 2.85970900  | 4.11589600  | 0.71437500  |
| 1  | 2.85015700  | 5.15598400  | 1.04887700  |
| 46 | 0.68988500  | -0.52923500 | -0.77734900 |
| 1  | -0.96635600 | -1.08231100 | -0.74461900 |
| 1  | -2.98693400 | -0.43228400 | 1.38541300  |
| 1  | -1.76343600 | -2.50922800 | -0.38608700 |
| 1  | -2.16384000 | 0.60001500  | -0.13331900 |
| 17 | 1.13837700  | -2.68991100 | -1.59581300 |
